# Supplementary material for: Predominance of the SARS-CoV-2 Lineage P.1 and Its Sublineage P.1.2 in Patients from the Metropolitan Region of Porto Alegre, Southern Brazil in March 2021
Source: Pathogens. 2021 Aug 5;10(8):988. doi: 10.3390/pathogens10080988 (PMC8402156; doi:10.3390/pathogens10080988)

Sequencing depth of coverage for Sample: hCoV-19\_Brazil\_RS-HBM-39468\_2021

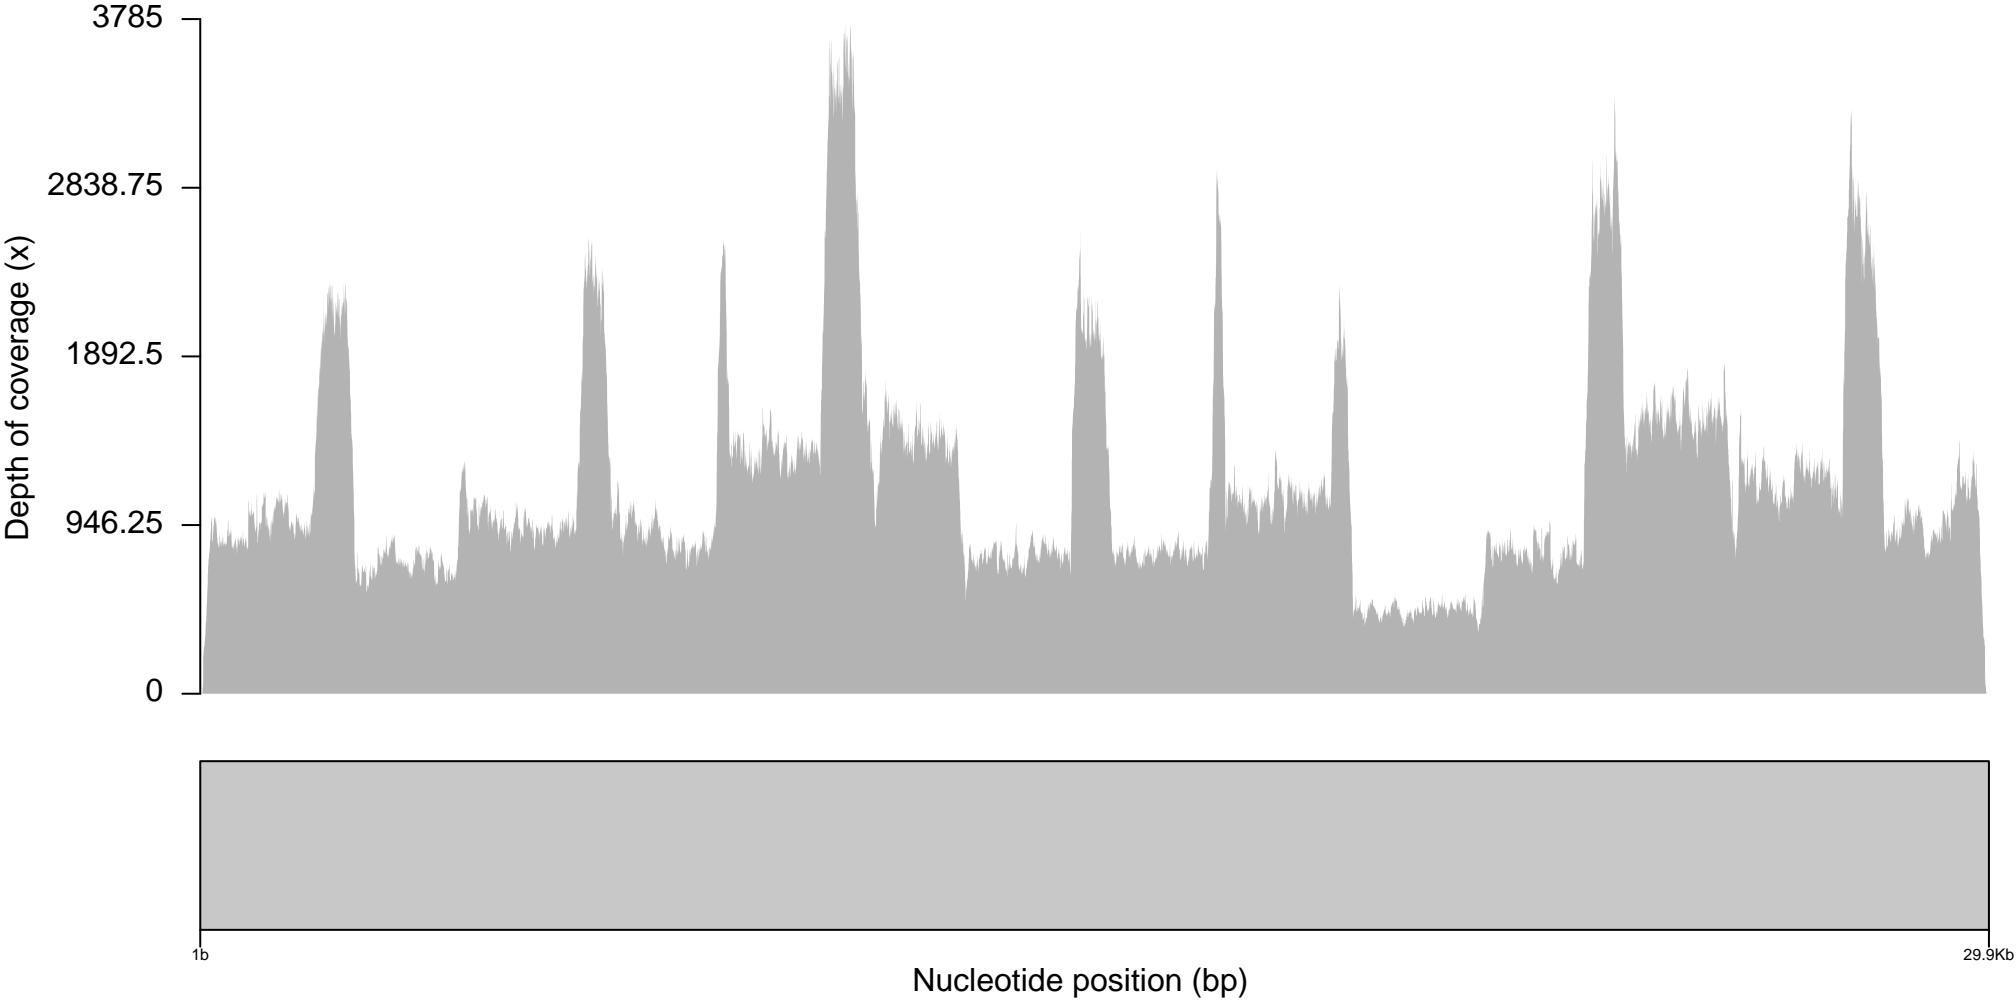

Sequencing depth of coverage for Sample: hCoV-19\_Brazil\_RS-HBM-39469\_2021

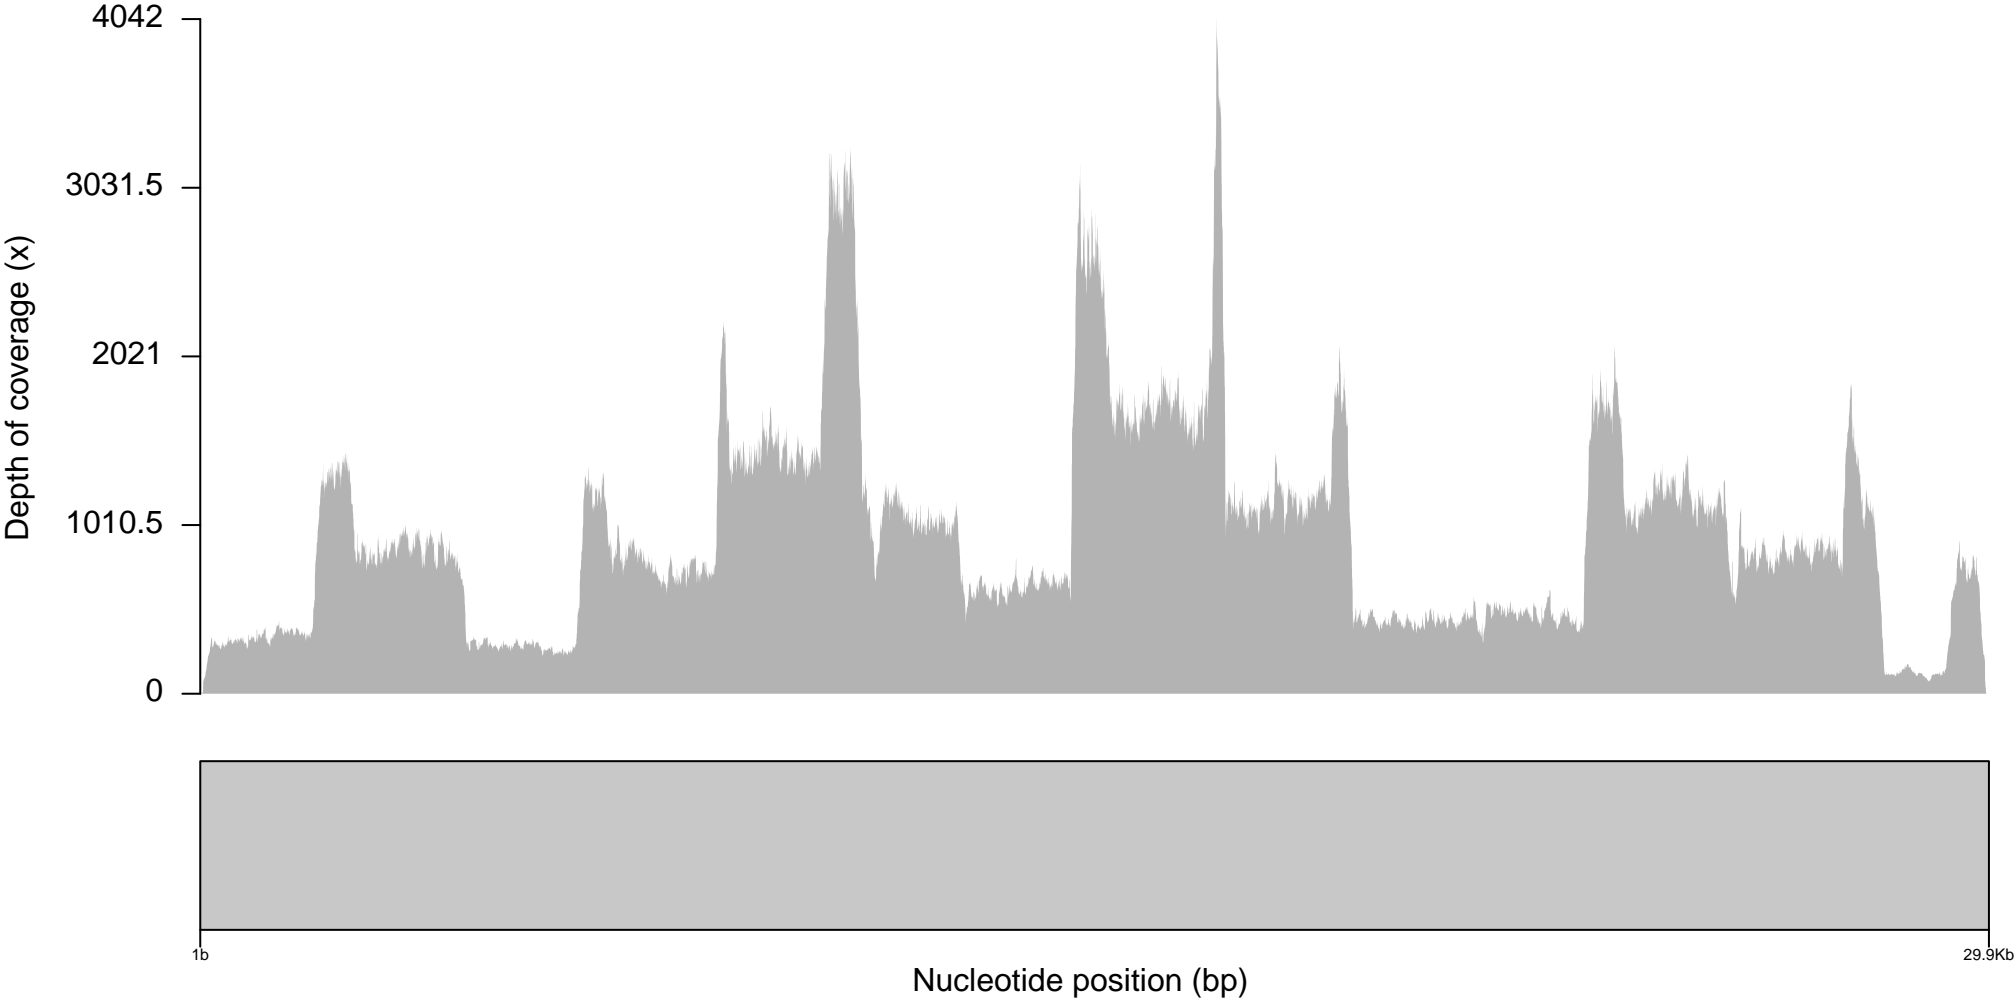

Sequencing depth of coverage for Sample: hCoV-19\_Brazil\_RS-HBM-39470\_2021

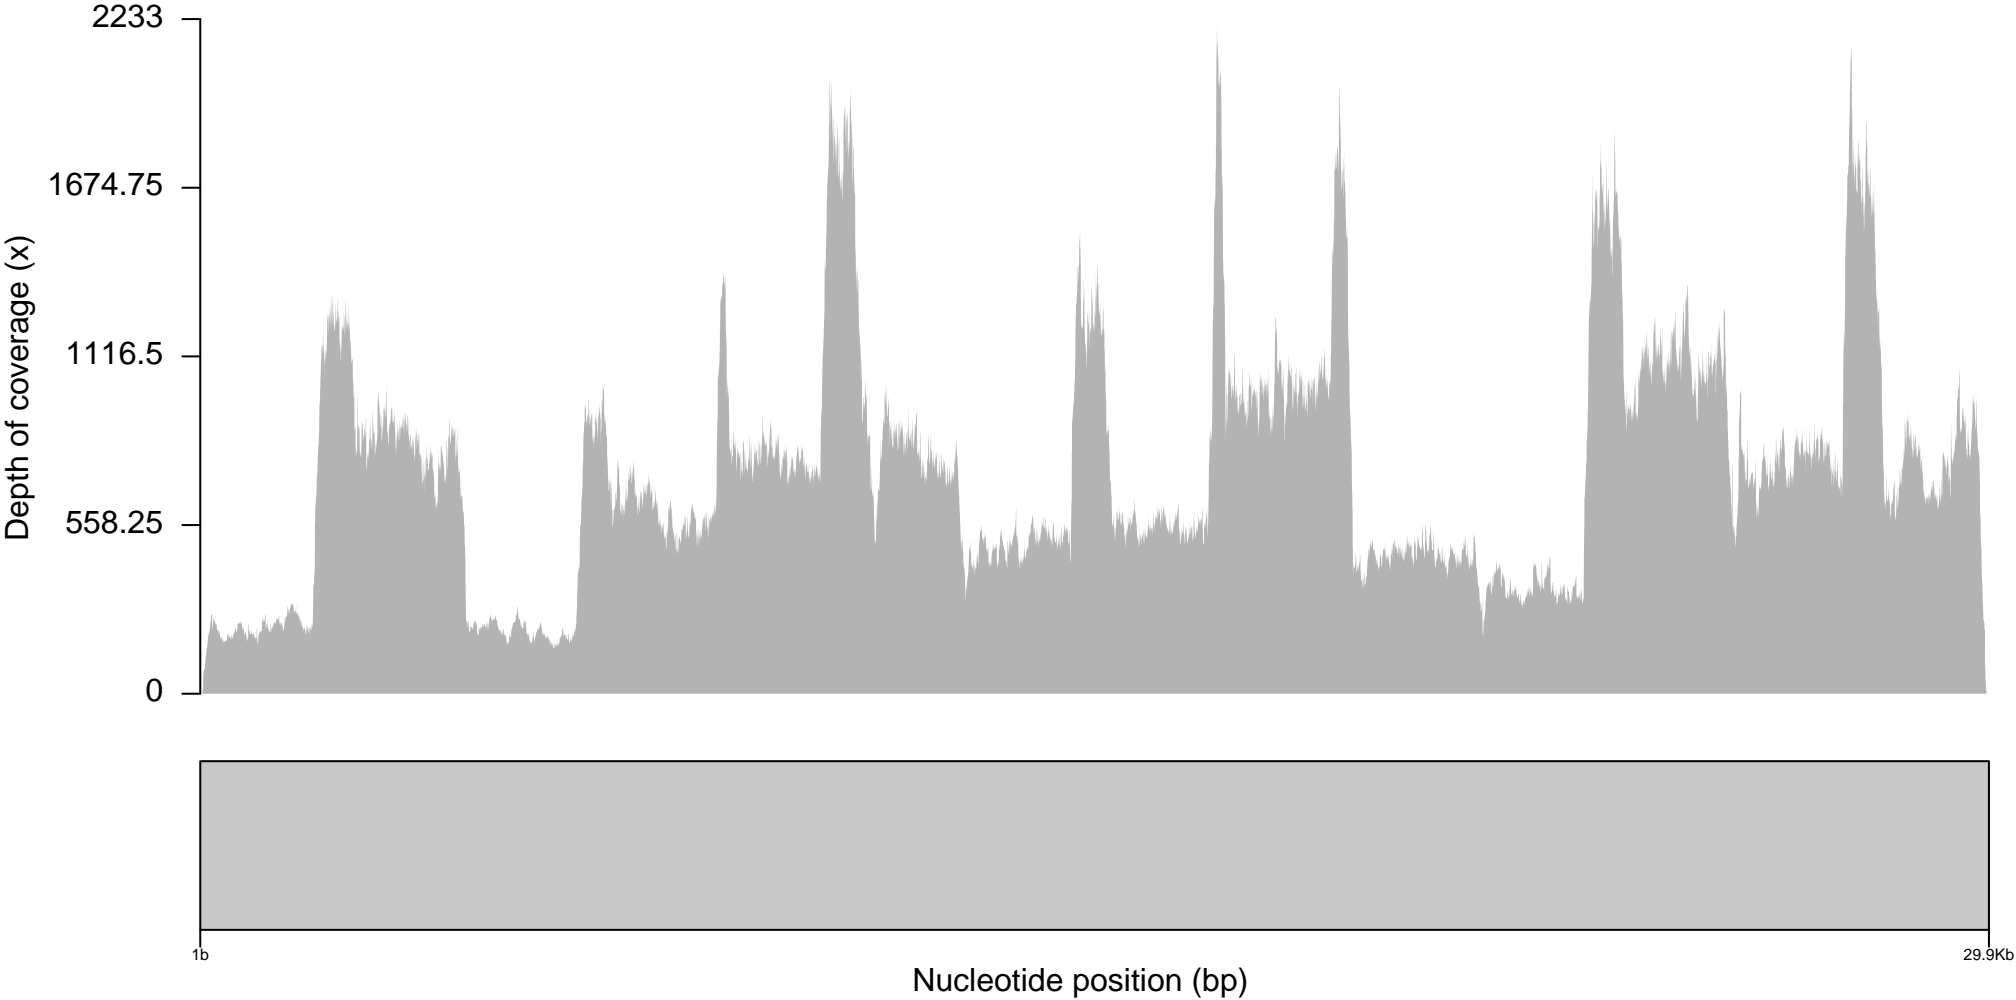

Sequencing depth of coverage for Sample: hCoV-19\_Brazil\_RS-HBM-39471\_2021

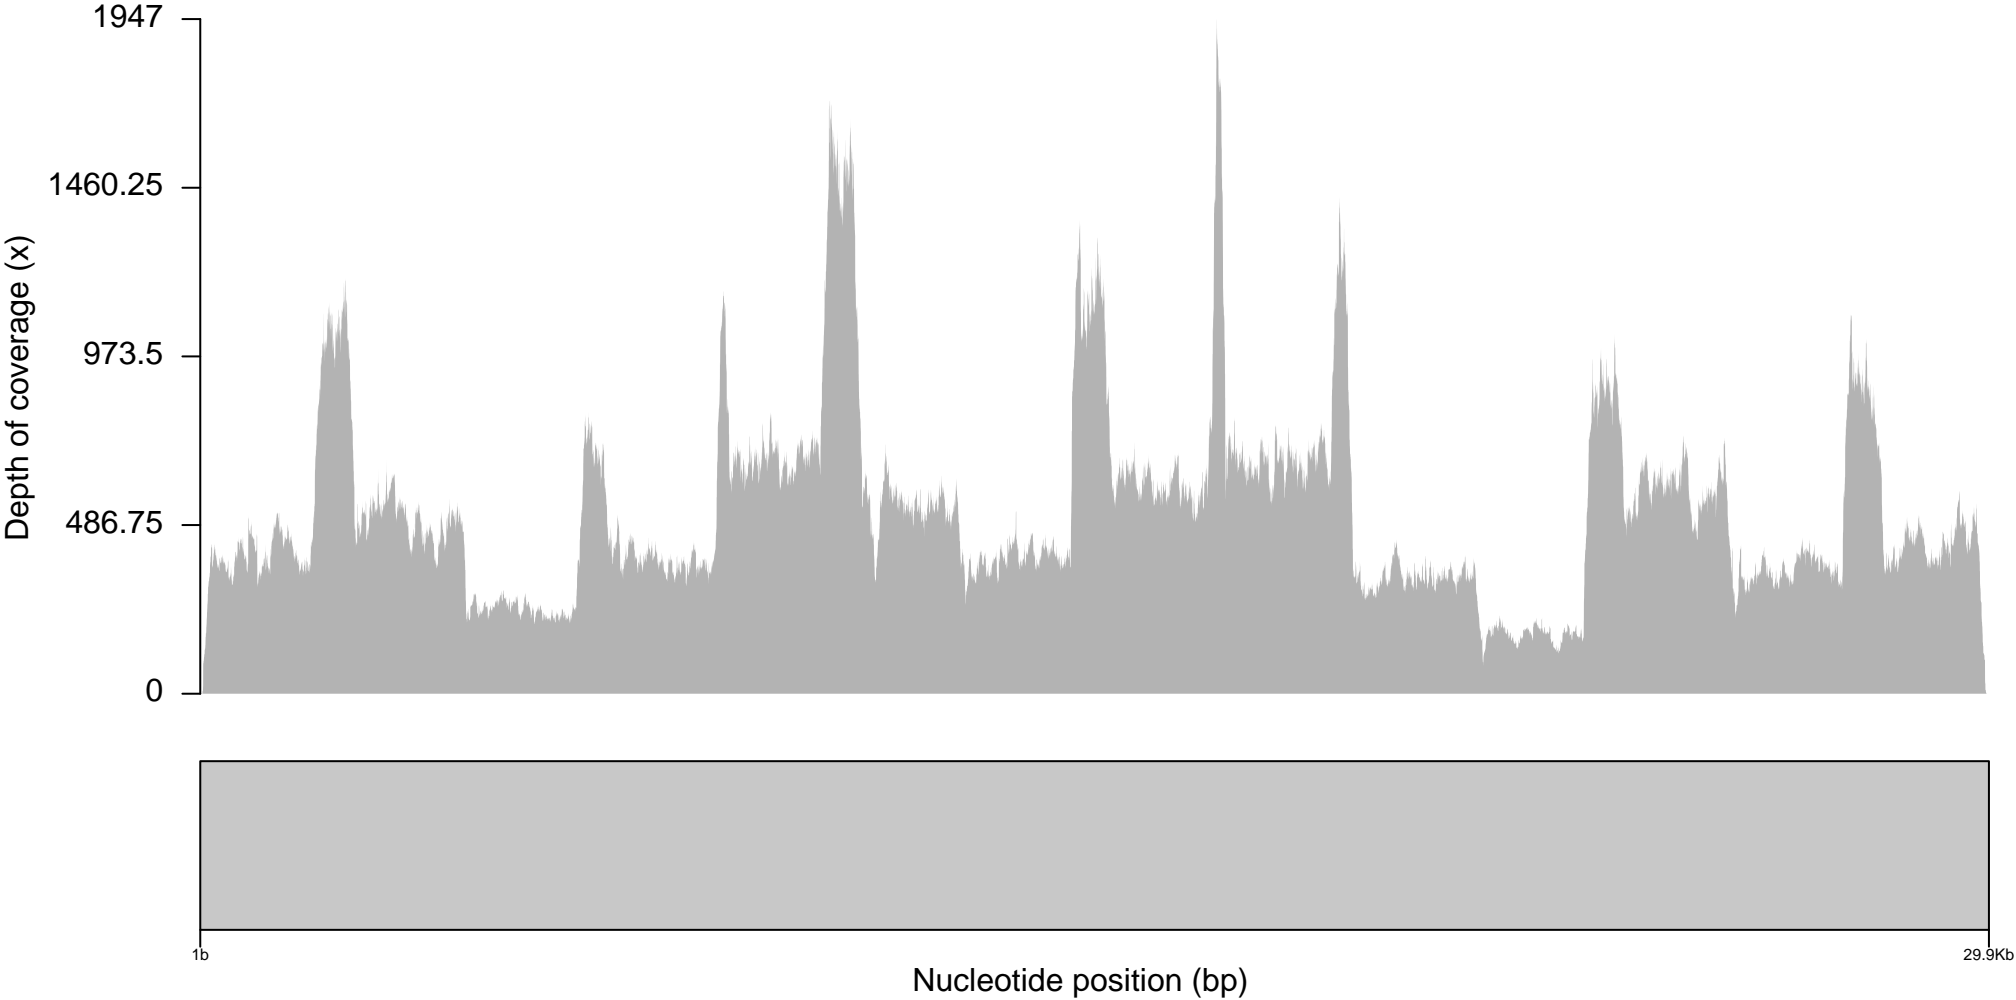

Sequencing depth of coverage for Sample: hCoV-19\_Brazil\_RS-HBM-39472\_2021

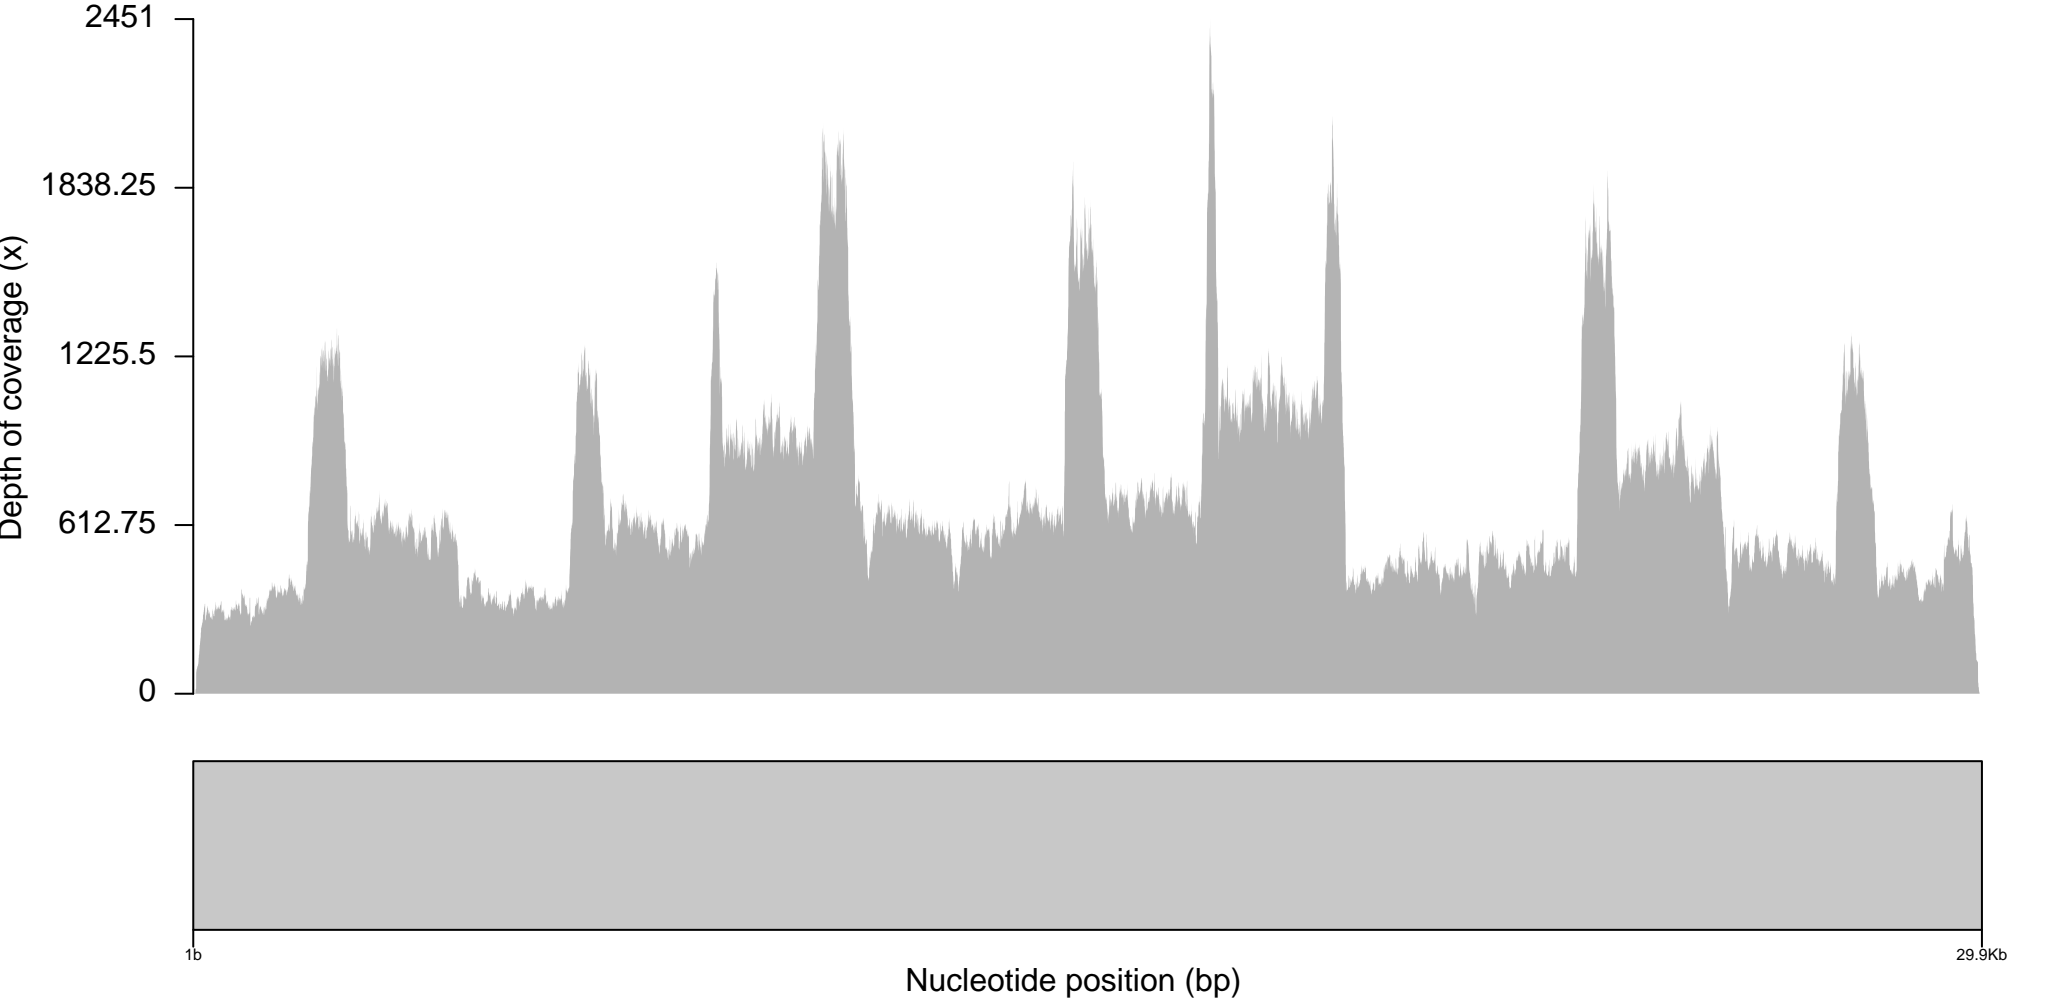

Sequencing depth of coverage for Sample: hCoV-19\_Brazil\_RS-HBM-39473\_2021

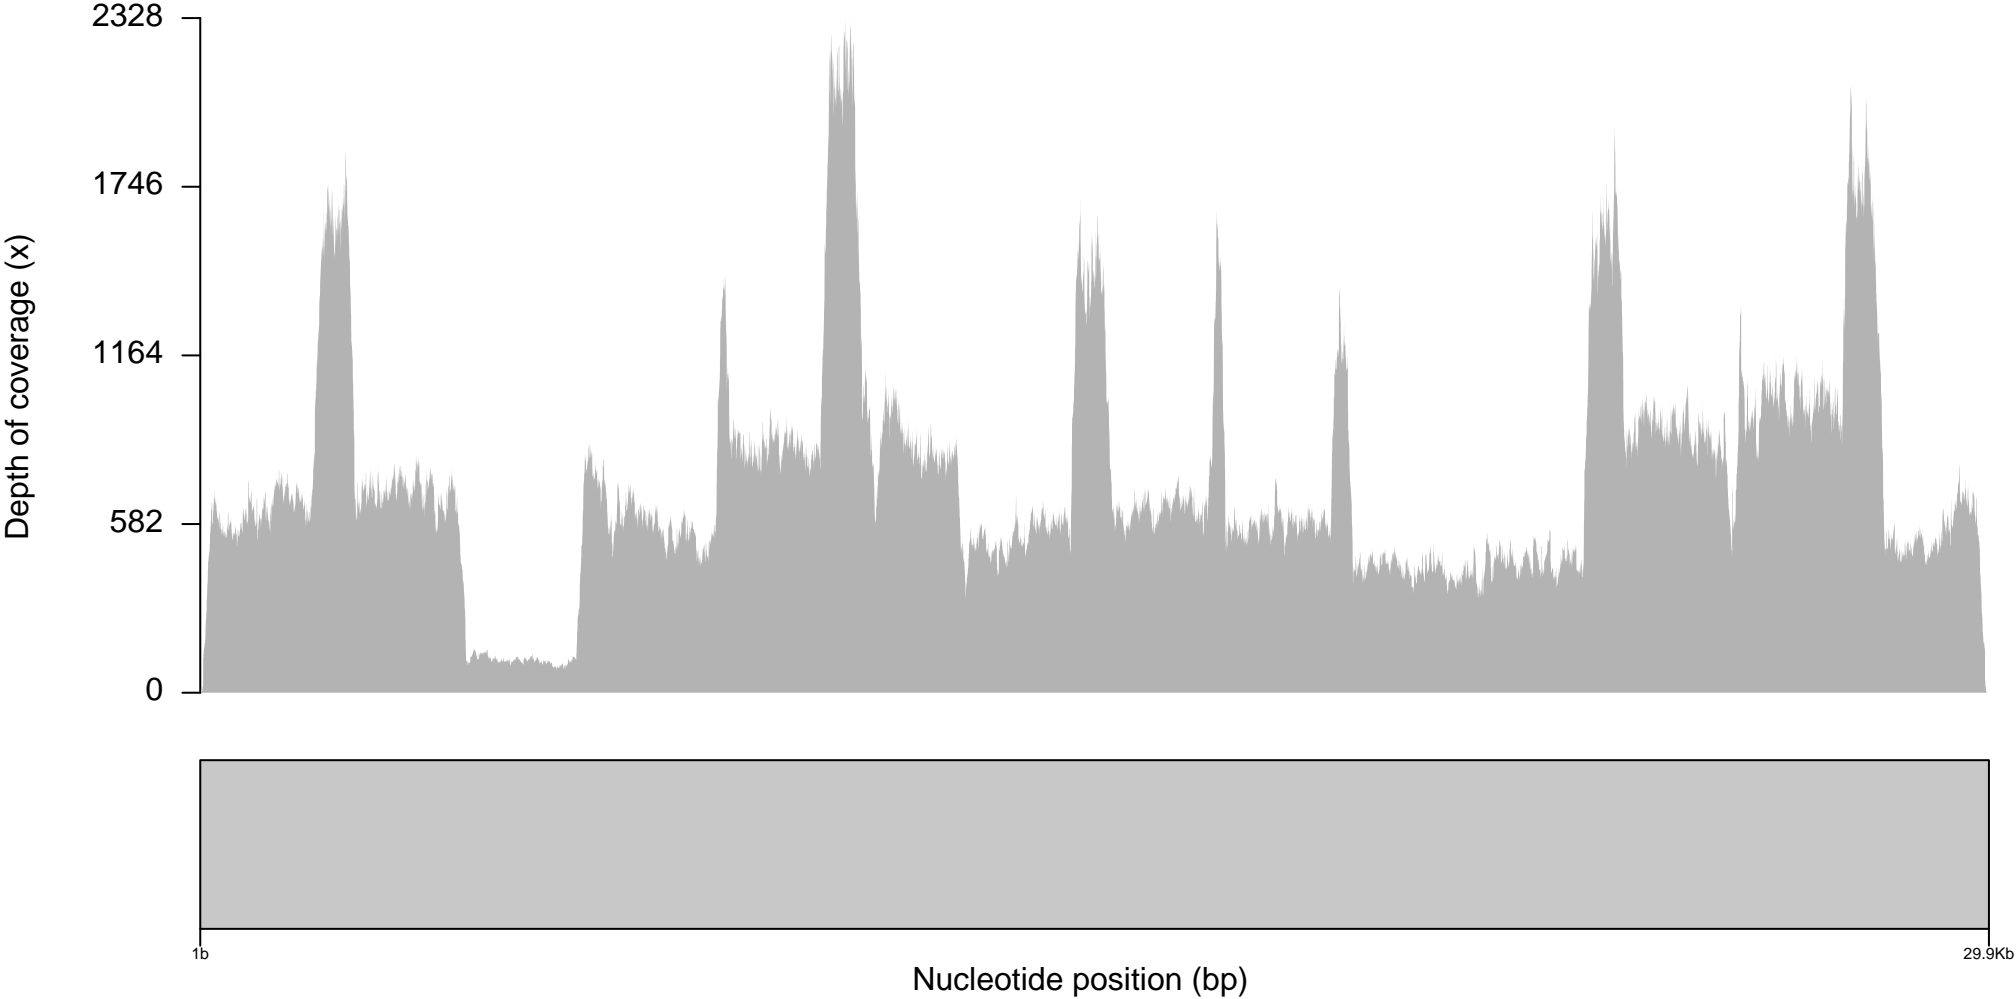

Sequencing depth of coverage for Sample: hCoV-19\_Brazil\_RS-HBM-39474\_2021

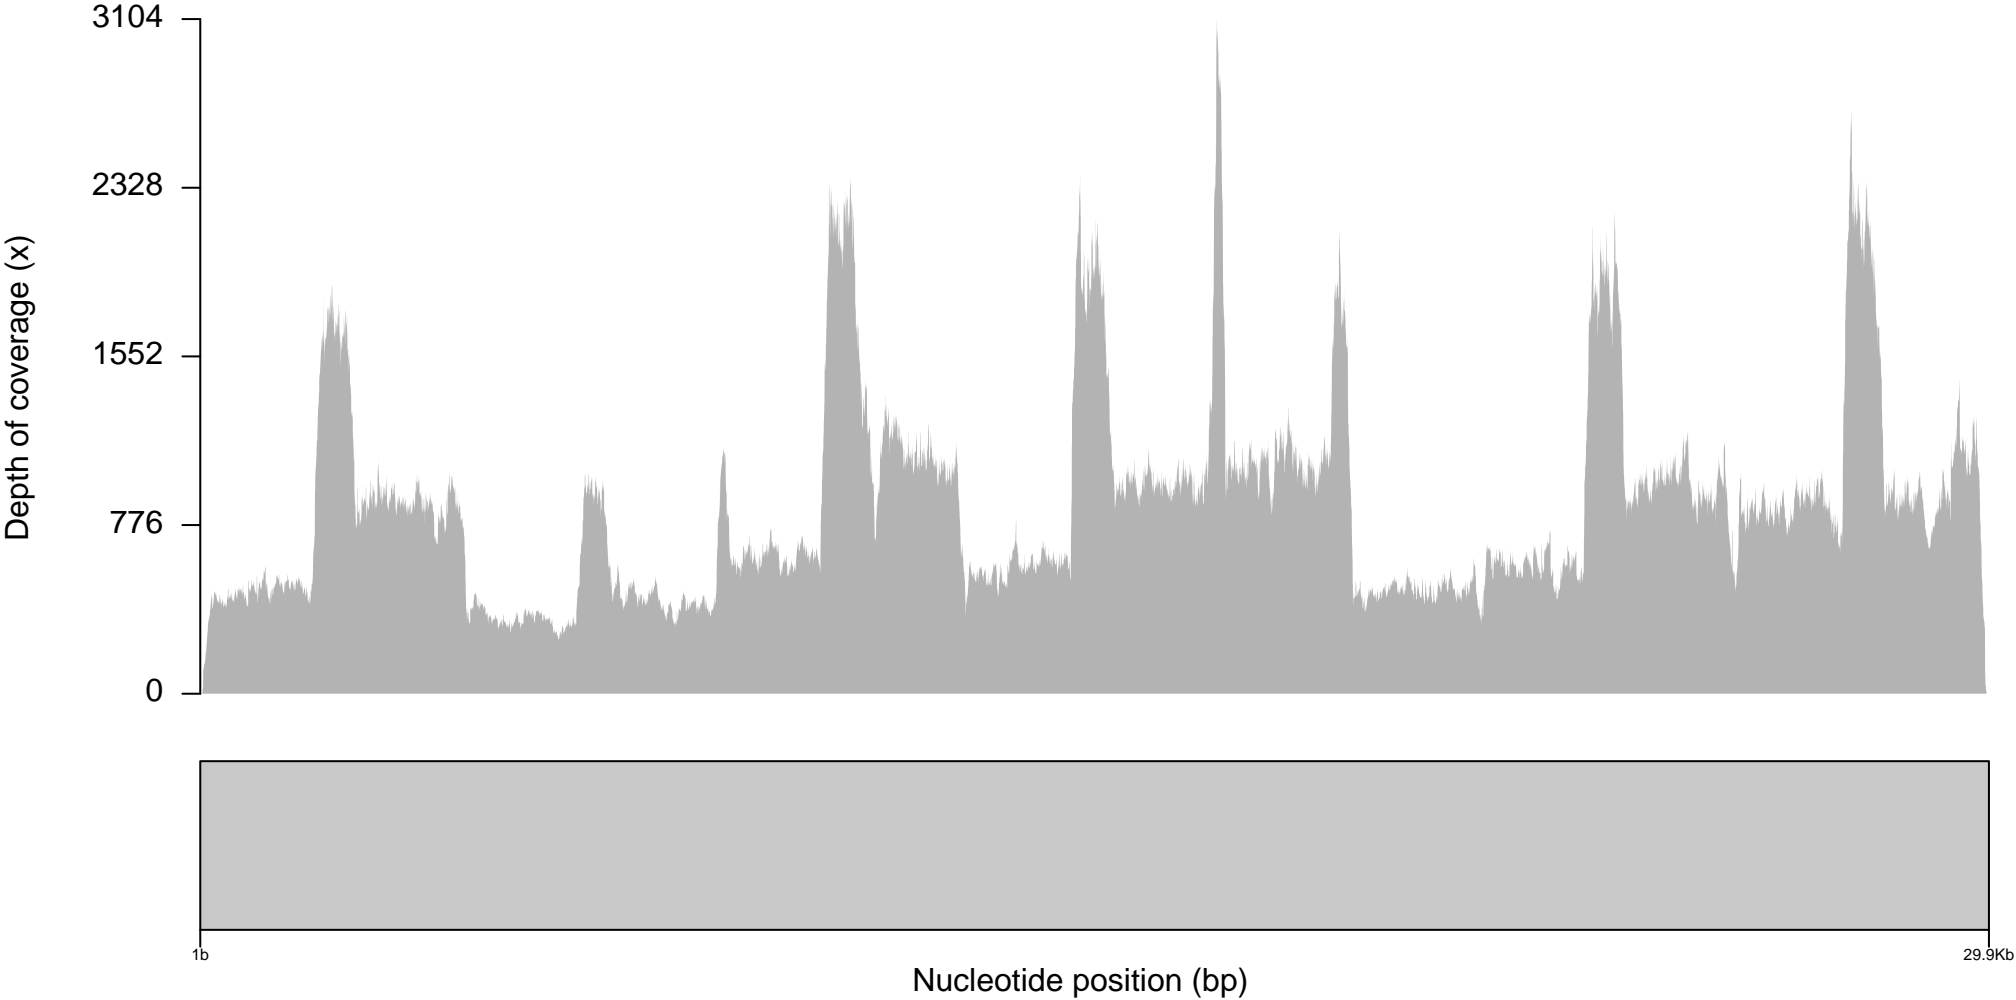

Sequencing depth of coverage for Sample: hCoV-19\_Brazil\_RS-HBM-39475\_2021

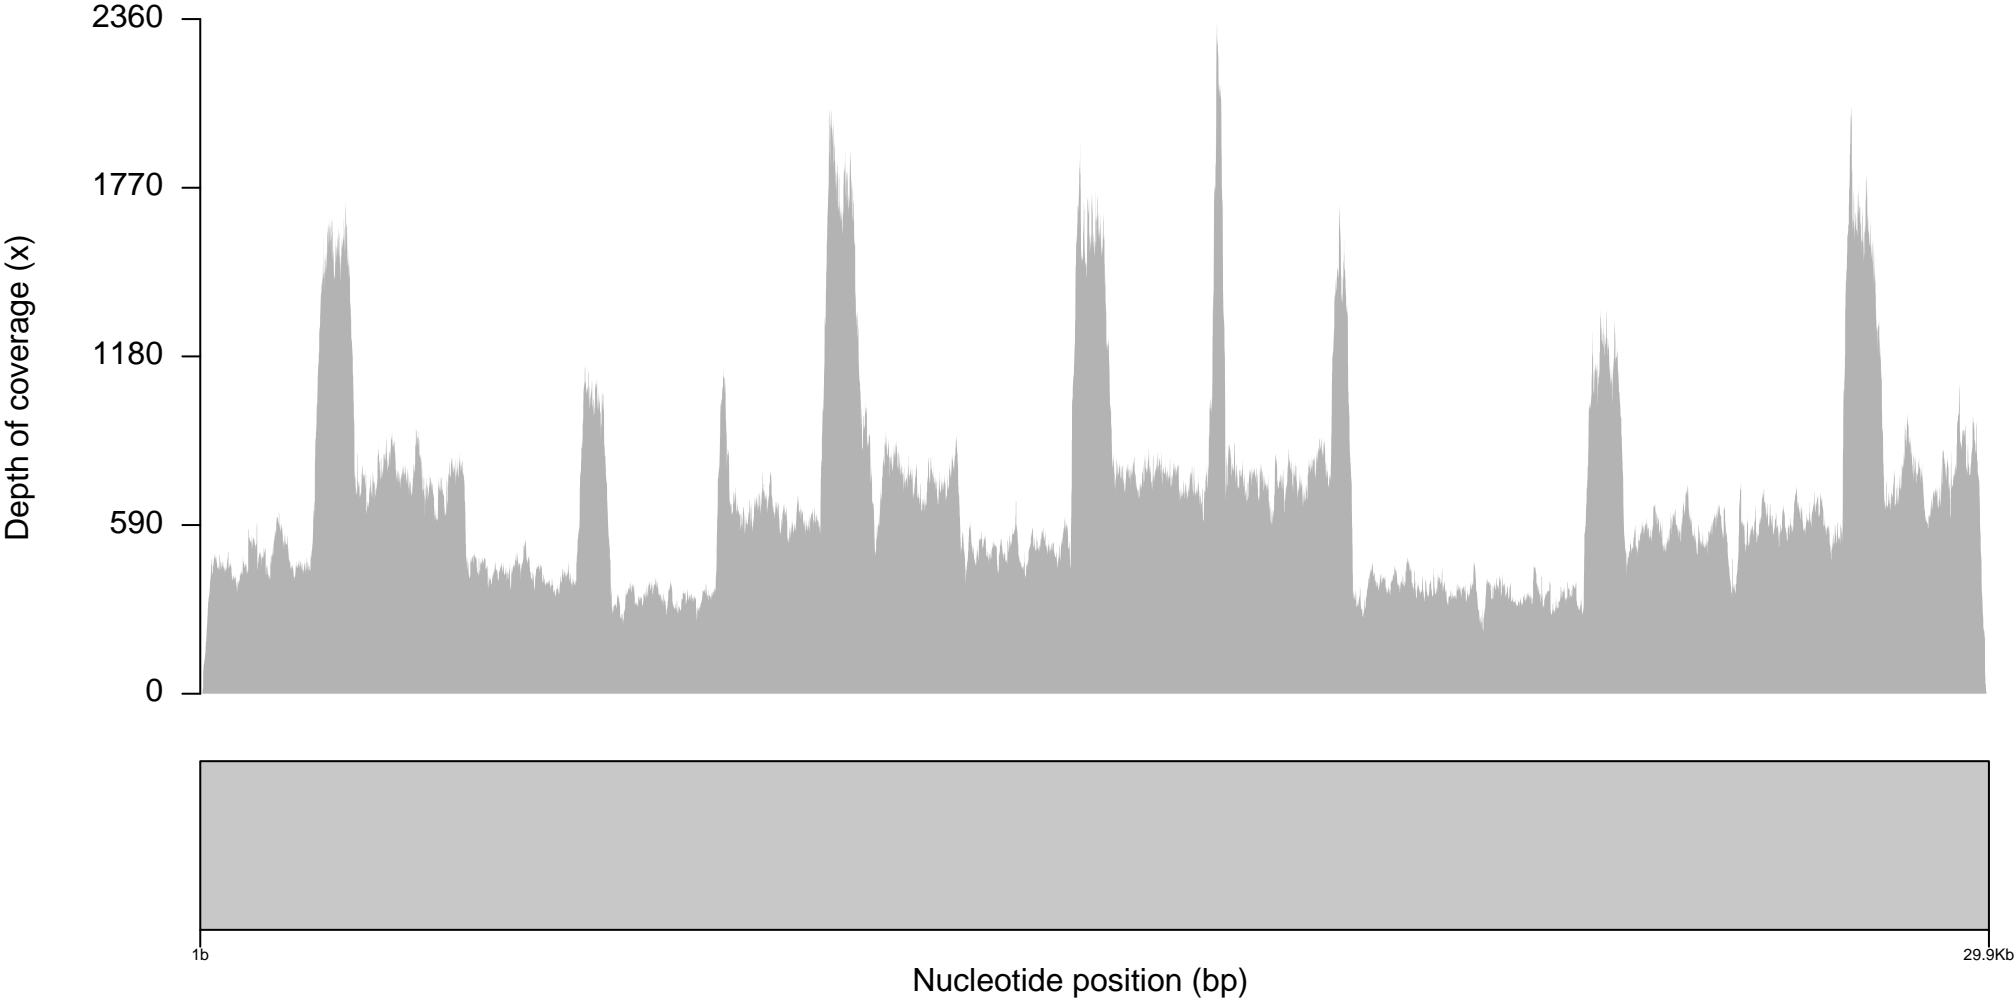

Sequencing depth of coverage for Sample: hCoV-19\_Brazil\_RS-HBM-39476\_2021

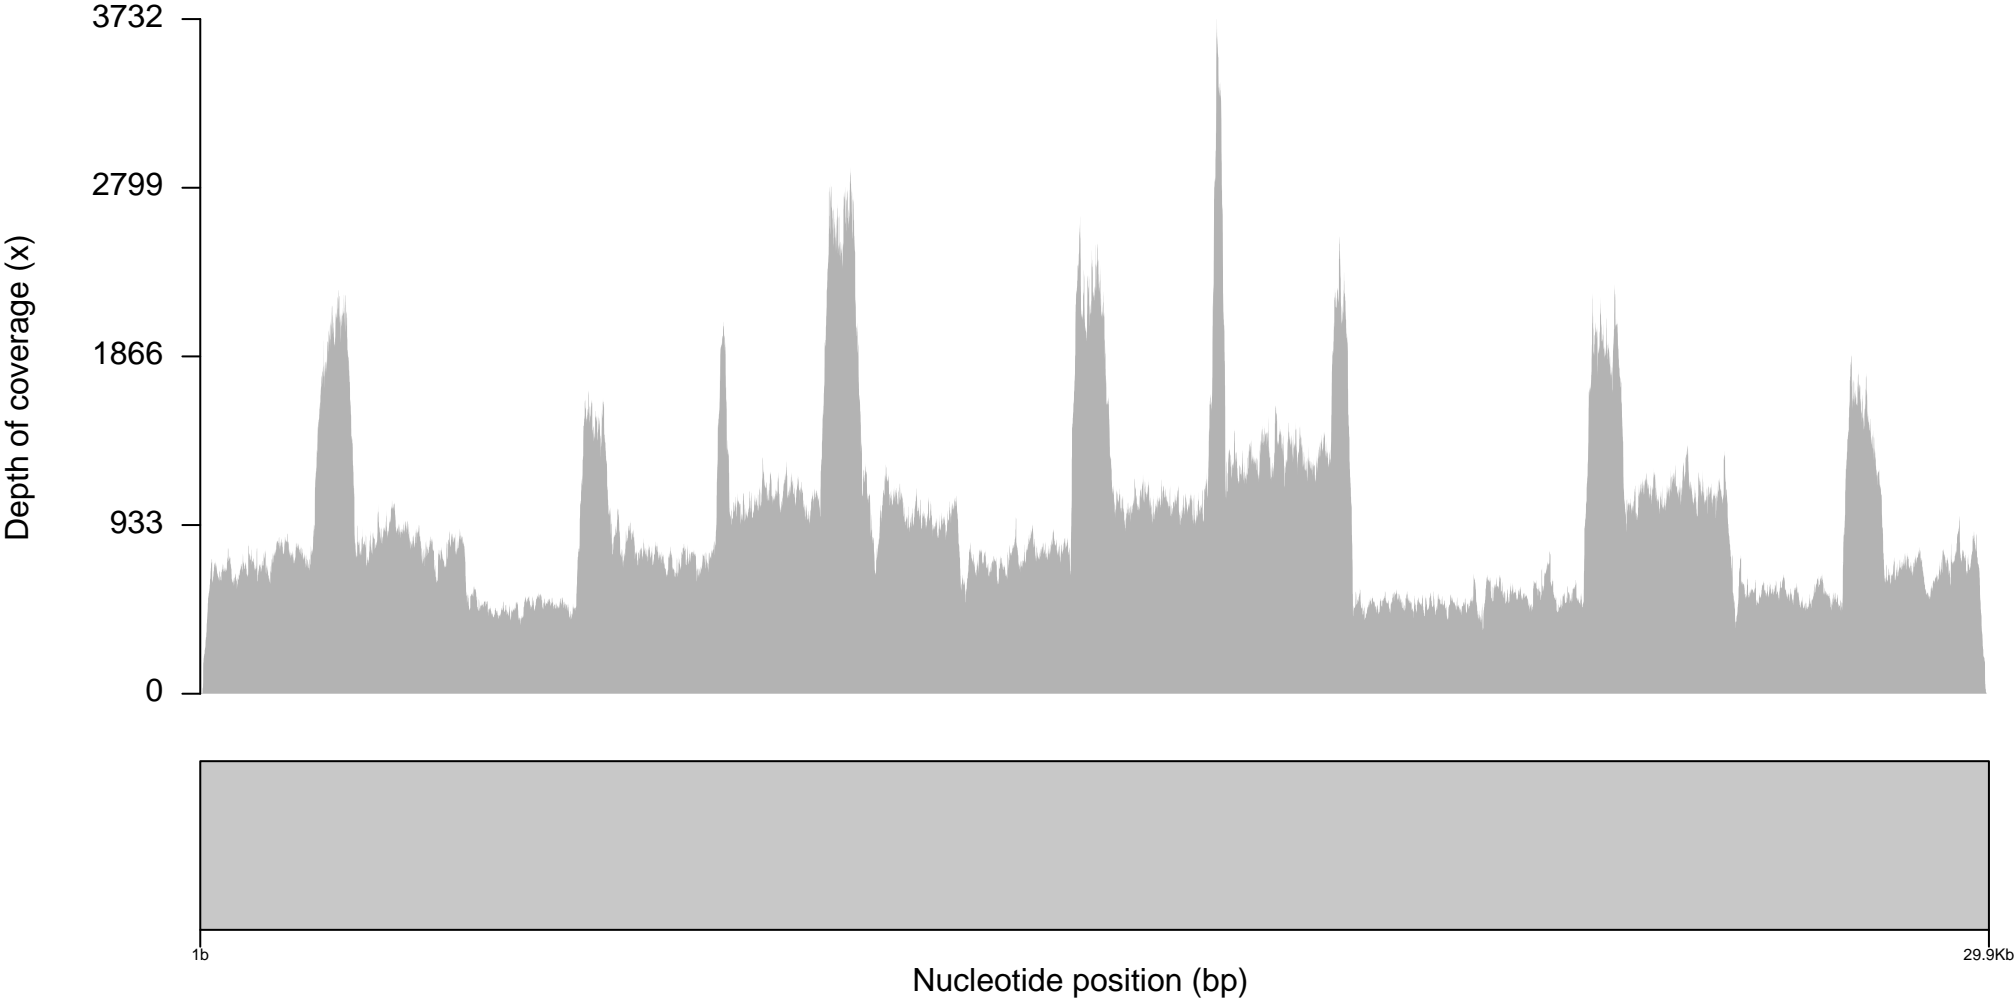

Sequencing depth of coverage for Sample: hCoV-19\_Brazil\_RS-HBM-39477\_2021

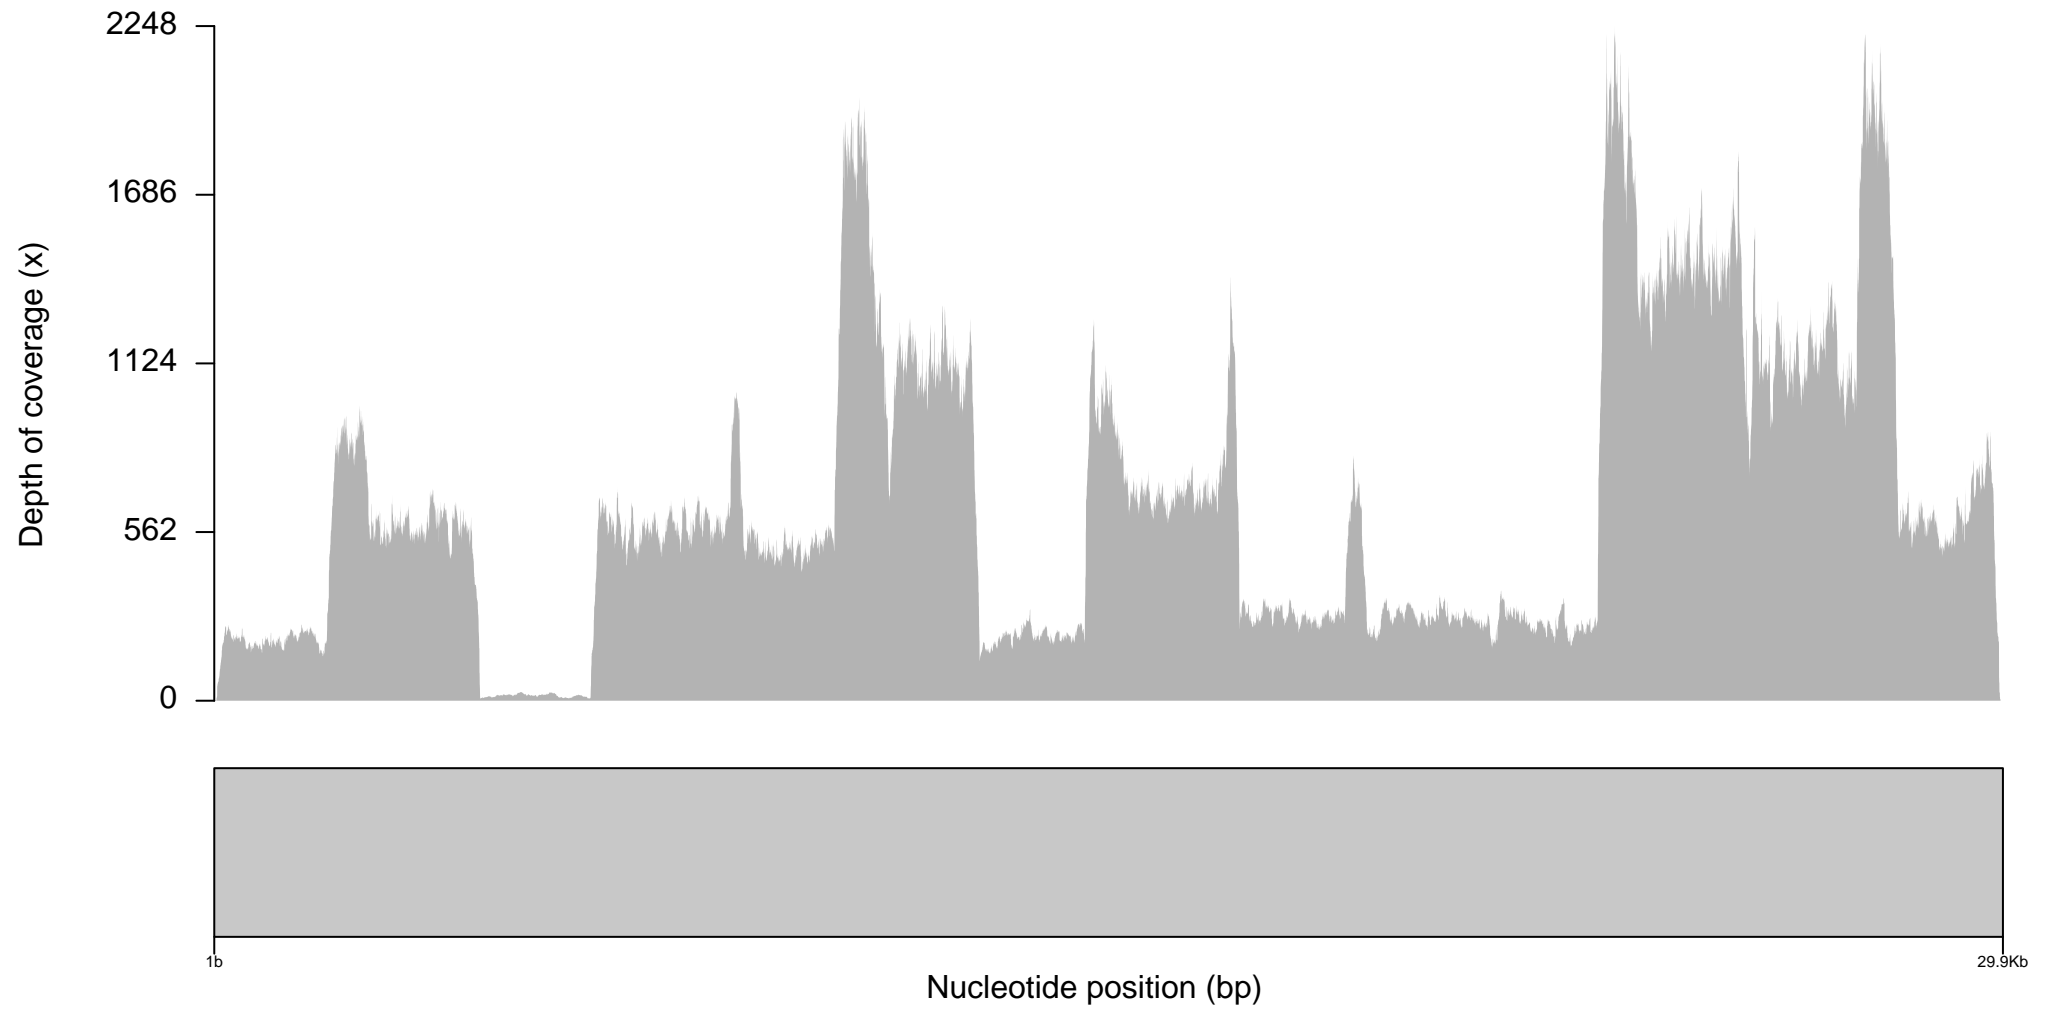

Sequencing depth of coverage for Sample: hCoV-19\_Brazil\_RS-HBM-39478\_2021

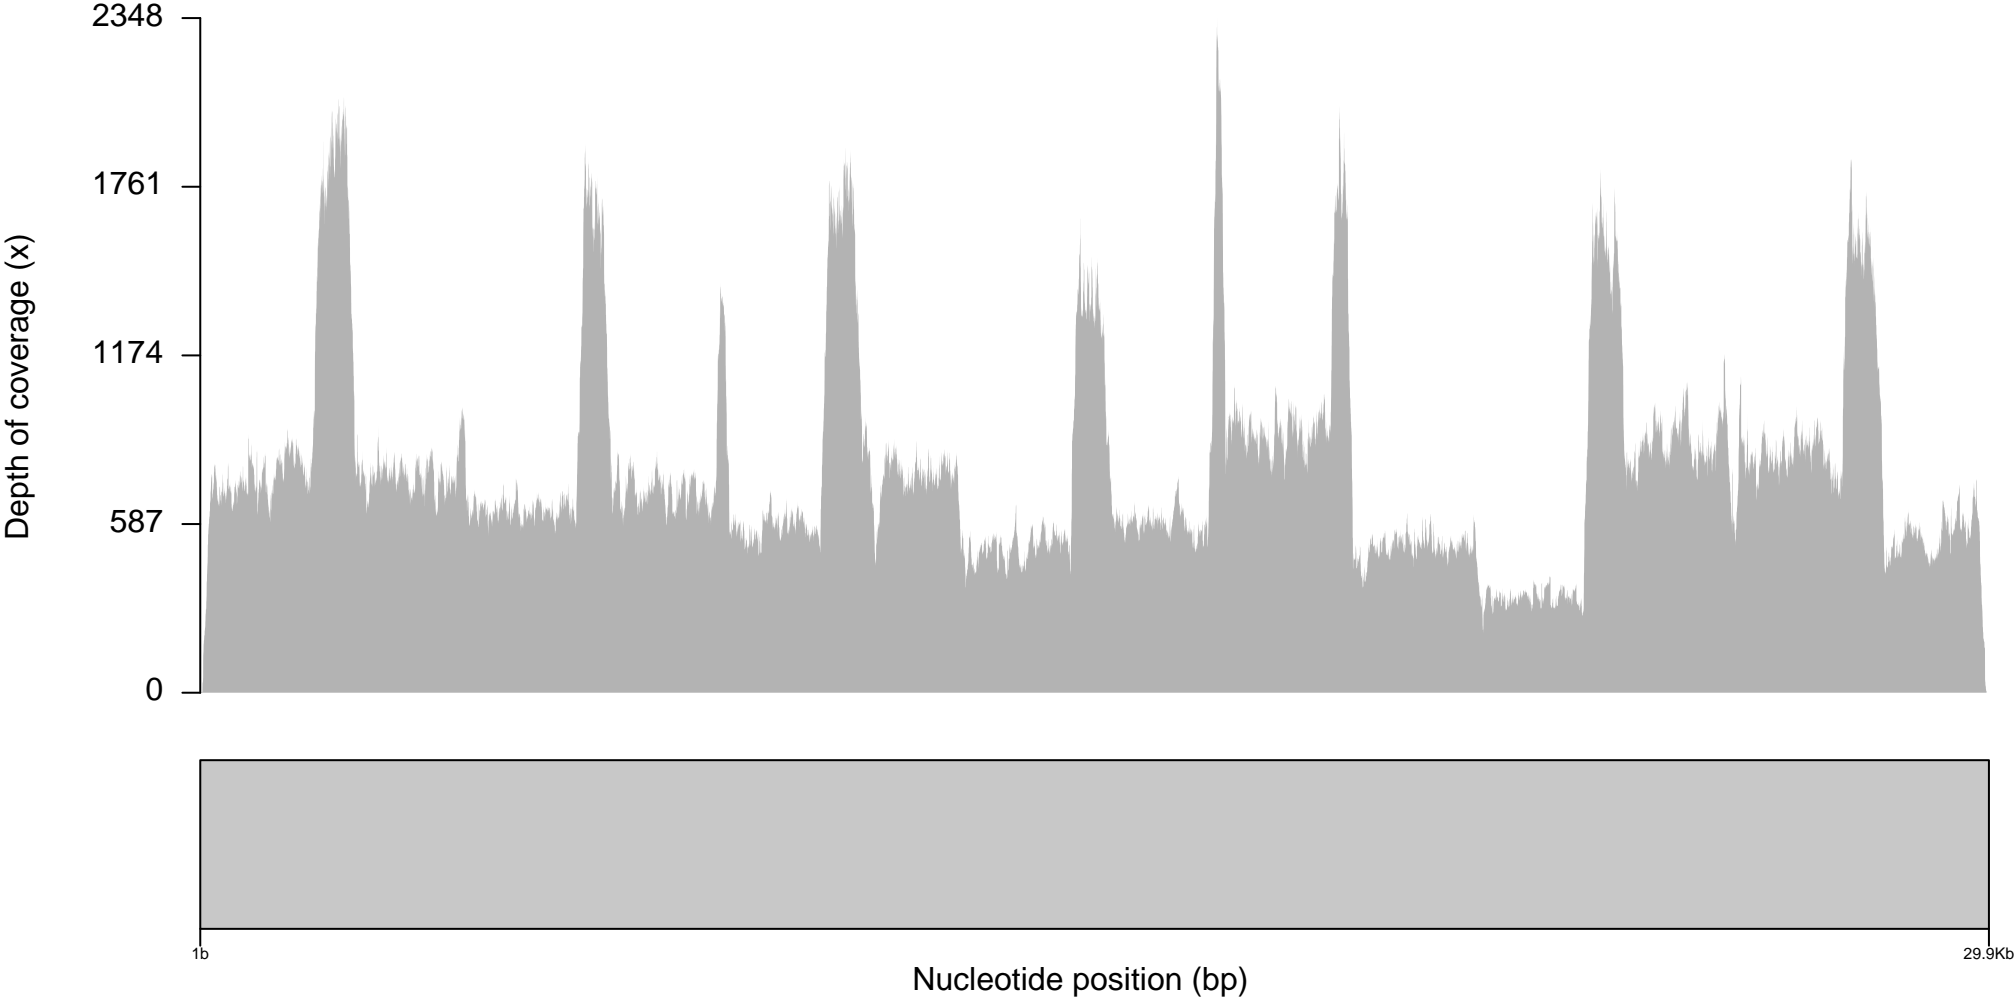

Sequencing depth of coverage for Sample: hCoV-19\_Brazil\_RS-HBM-39479\_2021

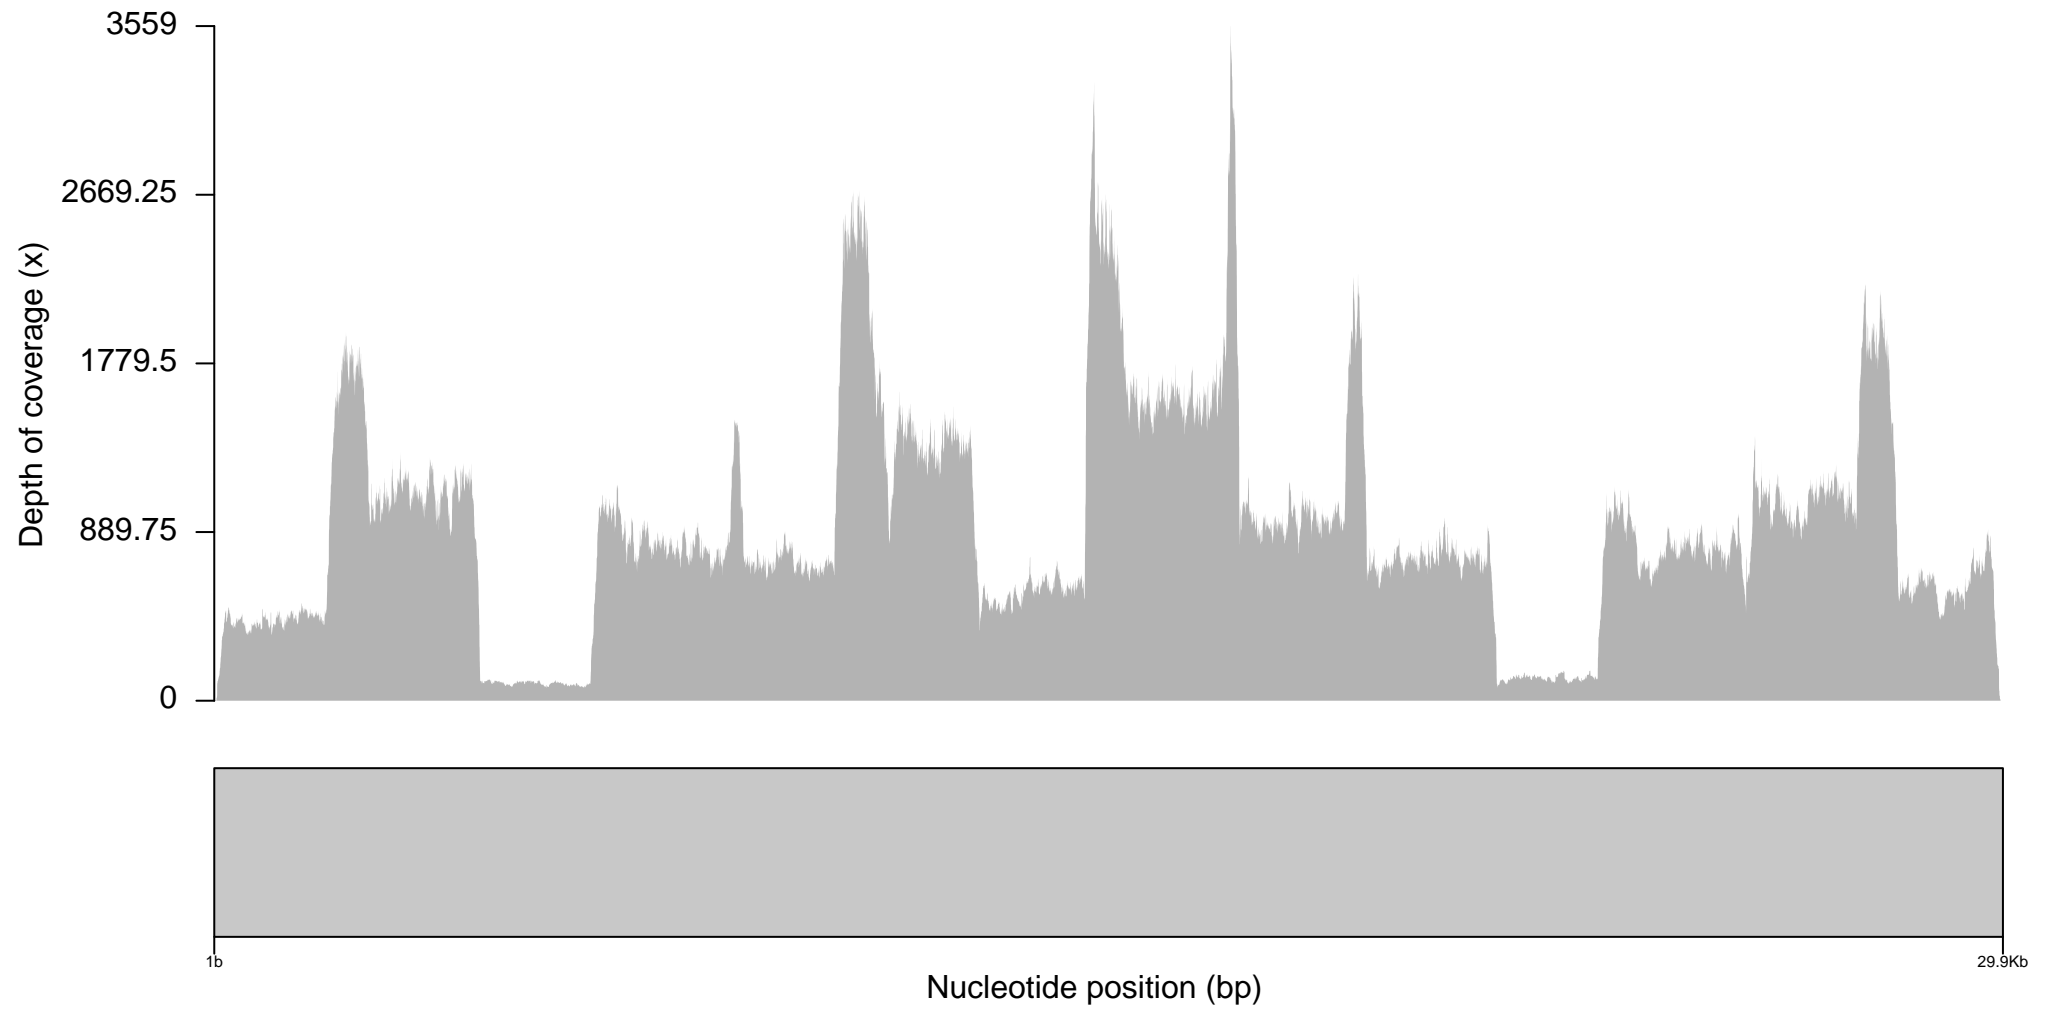

Sequencing depth of coverage for Sample: hCoV-19\_Brazil\_RS-HBM-39480\_2021

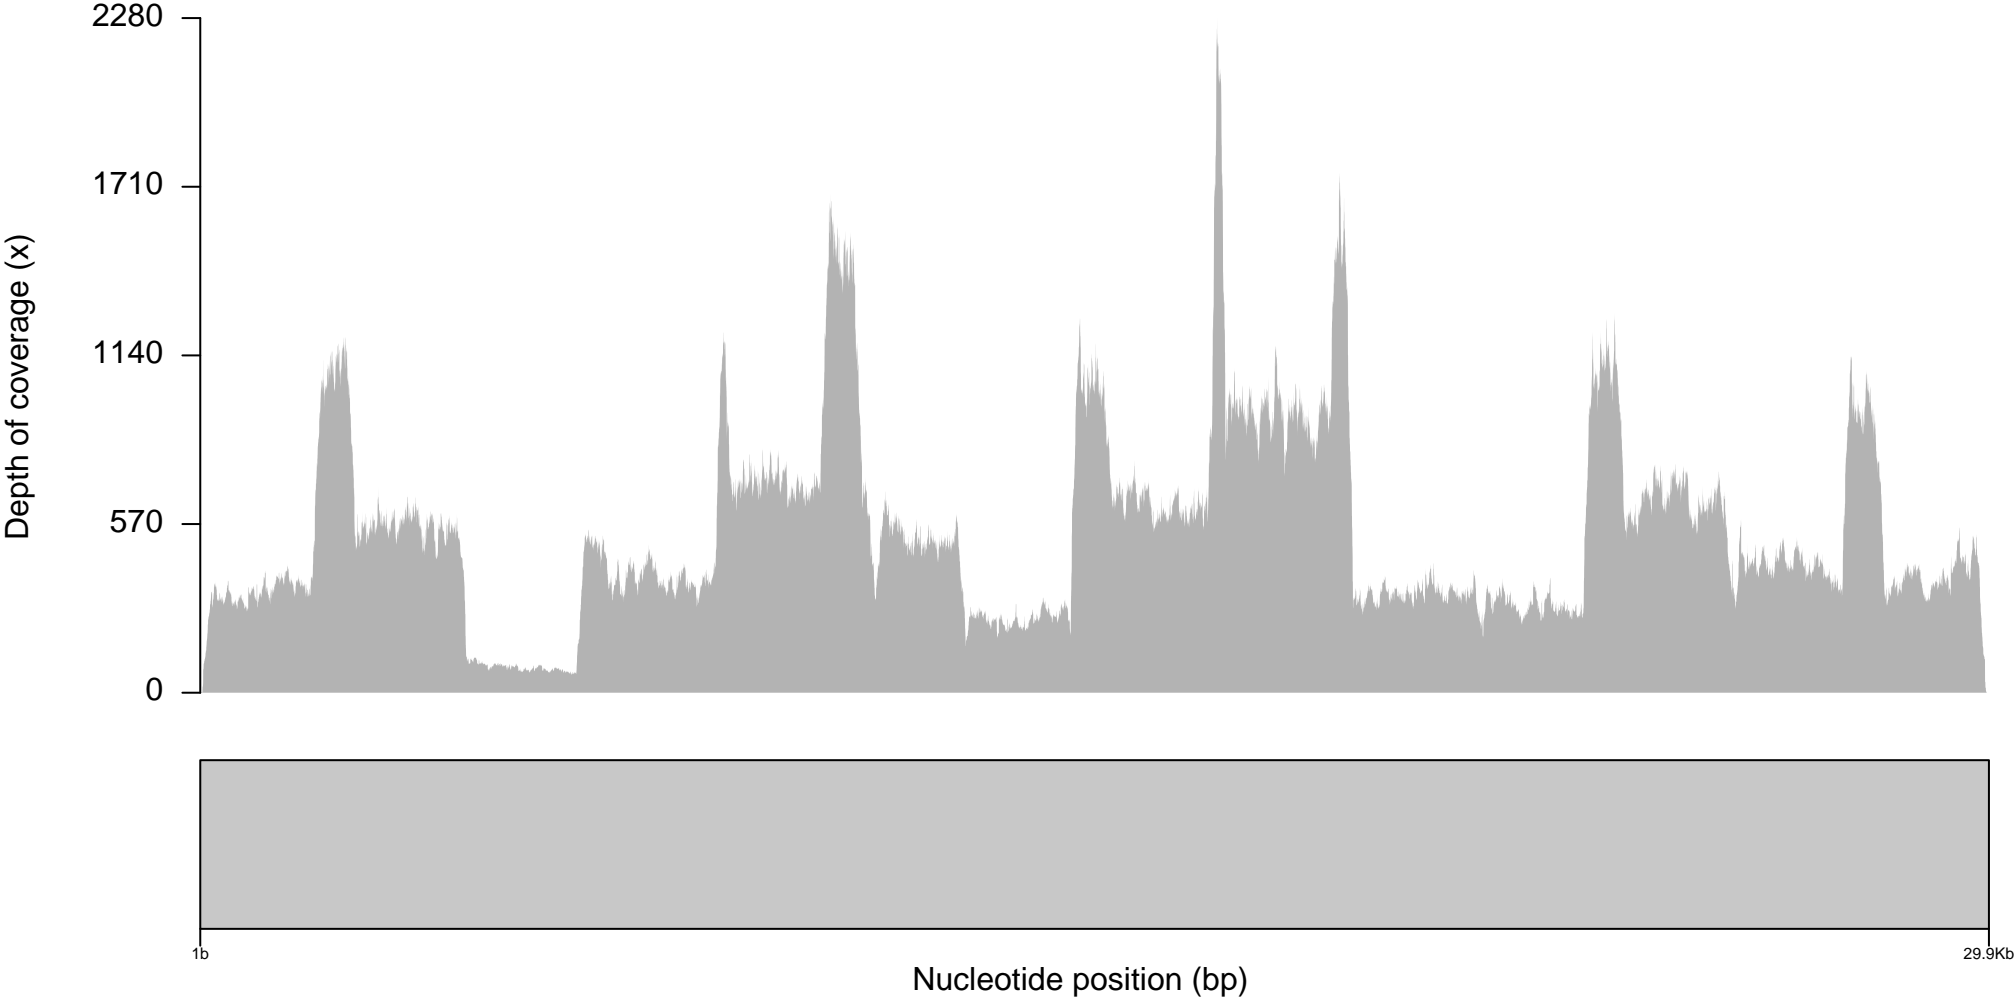

Sequencing depth of coverage for Sample: hCoV-19\_Brazil\_RS-HBM-39481\_2021

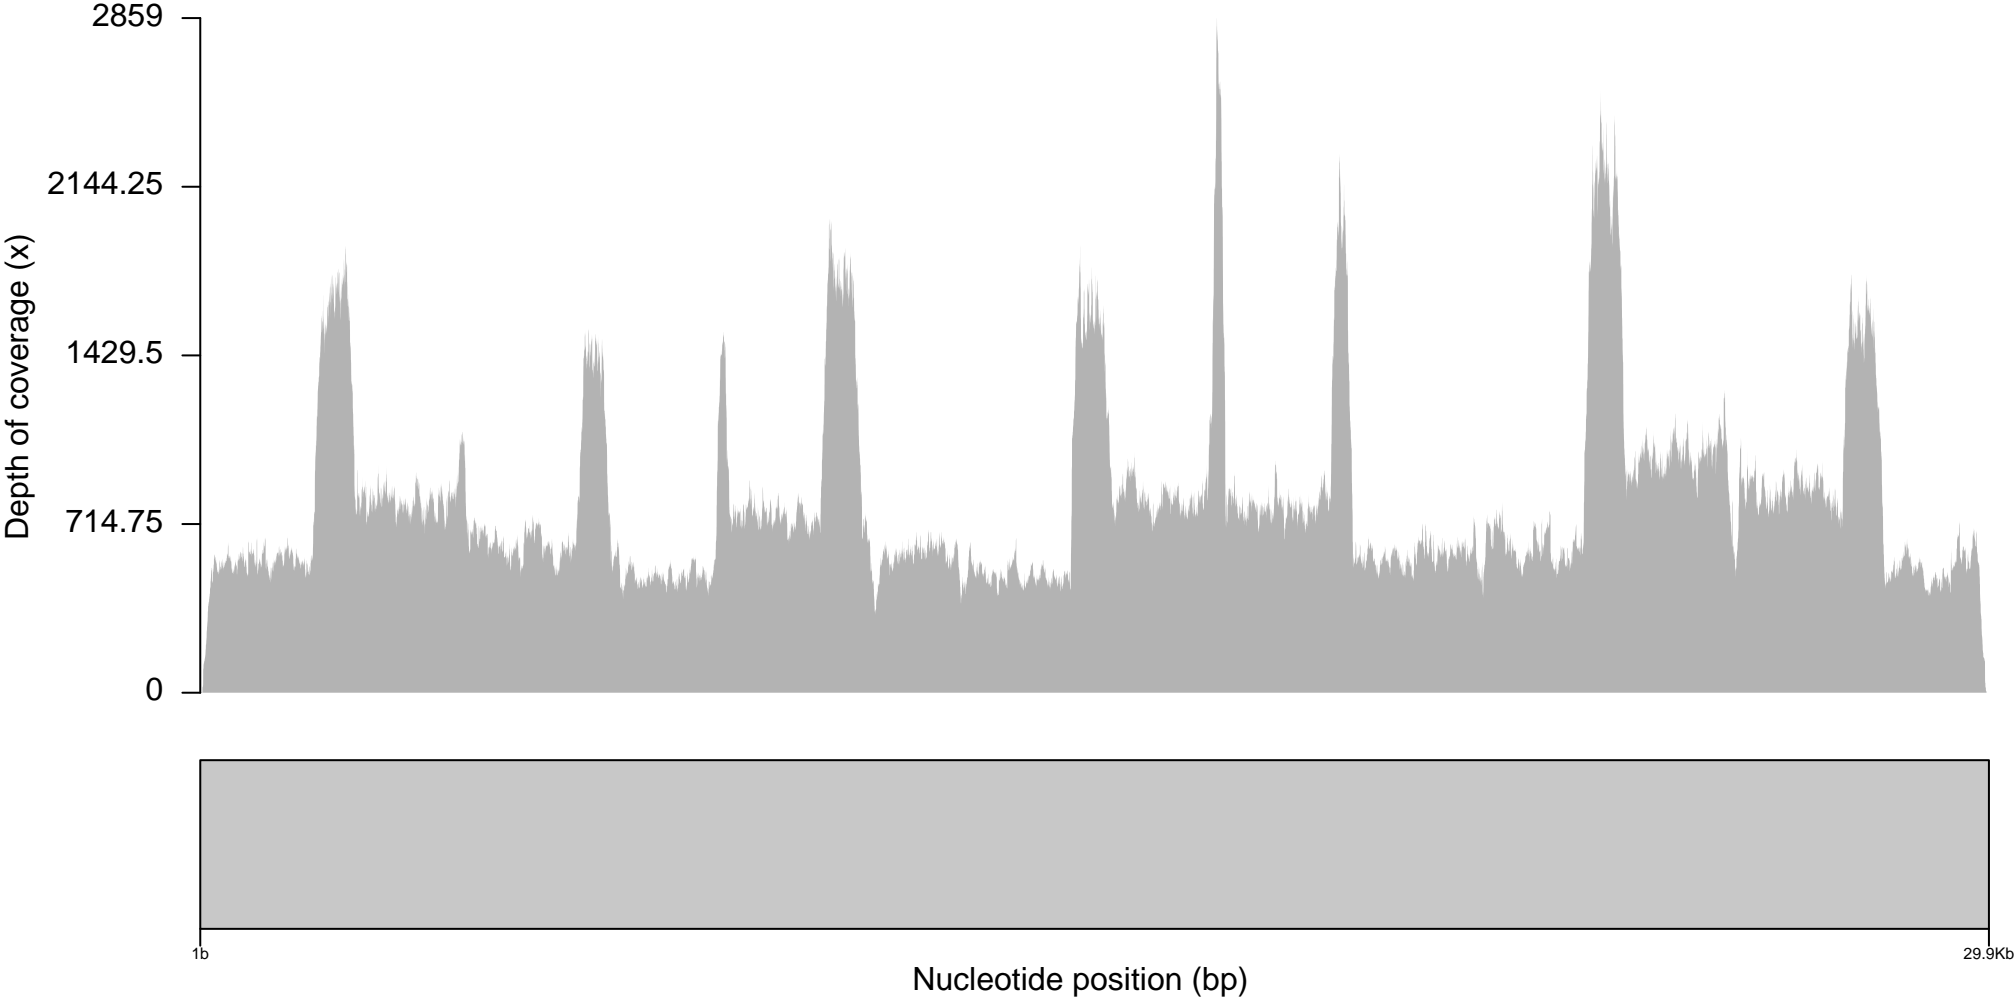

Sequencing depth of coverage for Sample: hCoV-19\_Brazil\_RS-HBM-39482\_2021

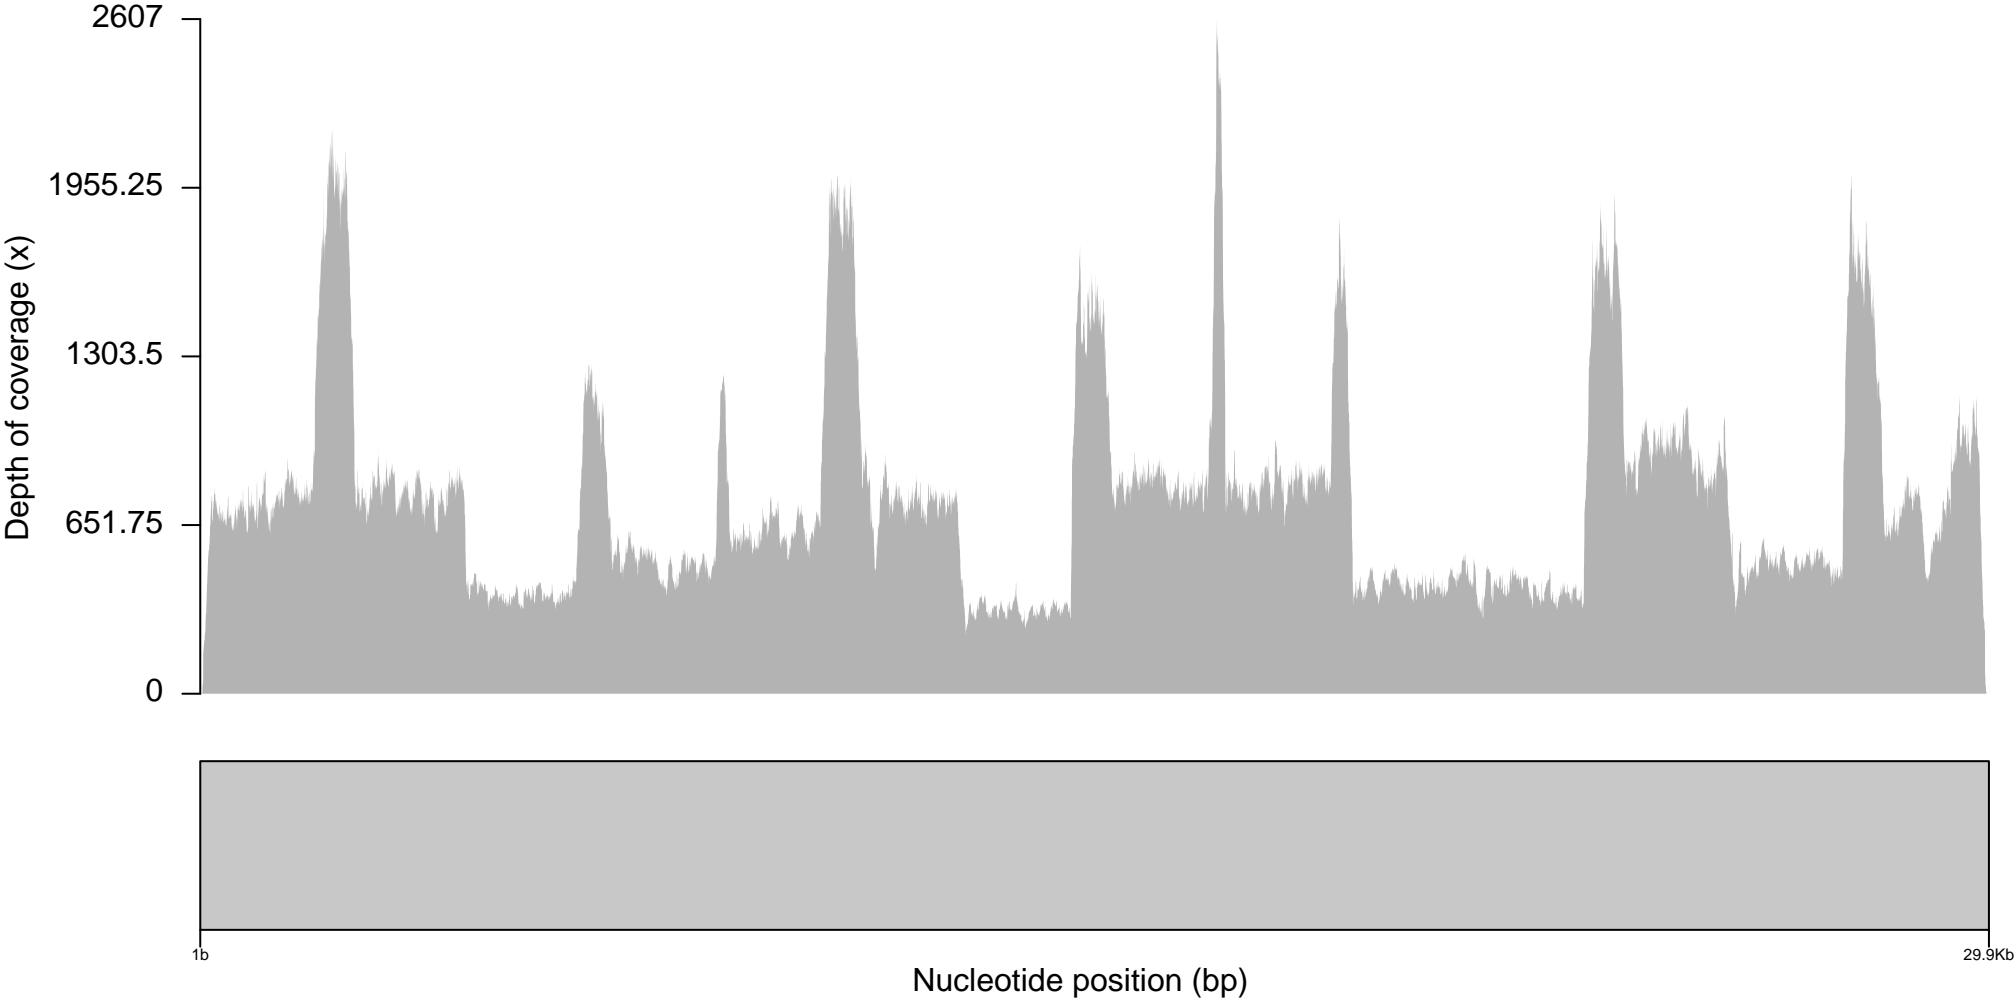

Sequencing depth of coverage for Sample: hCoV-19\_Brazil\_RS-HBM-39483\_2021

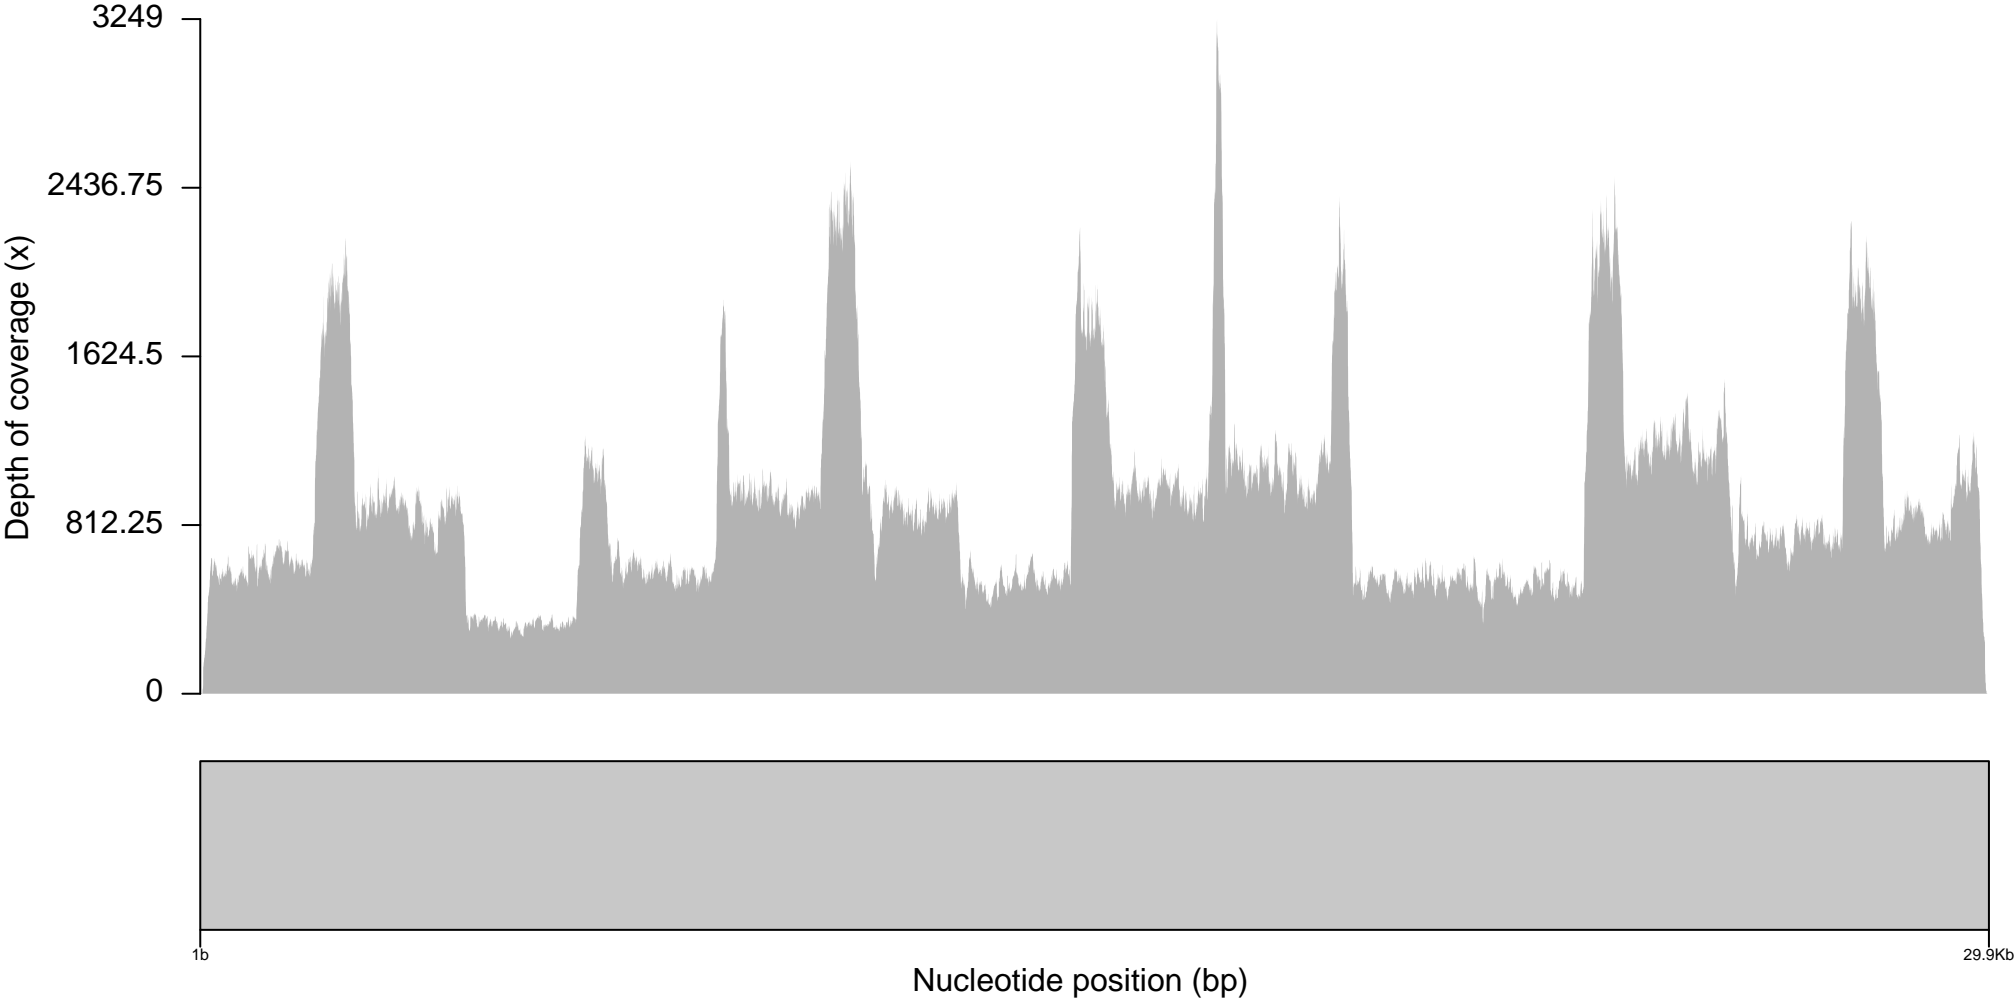

Sequencing depth of coverage for Sample: hCoV-19\_Brazil\_RS-HBM-39484\_2021

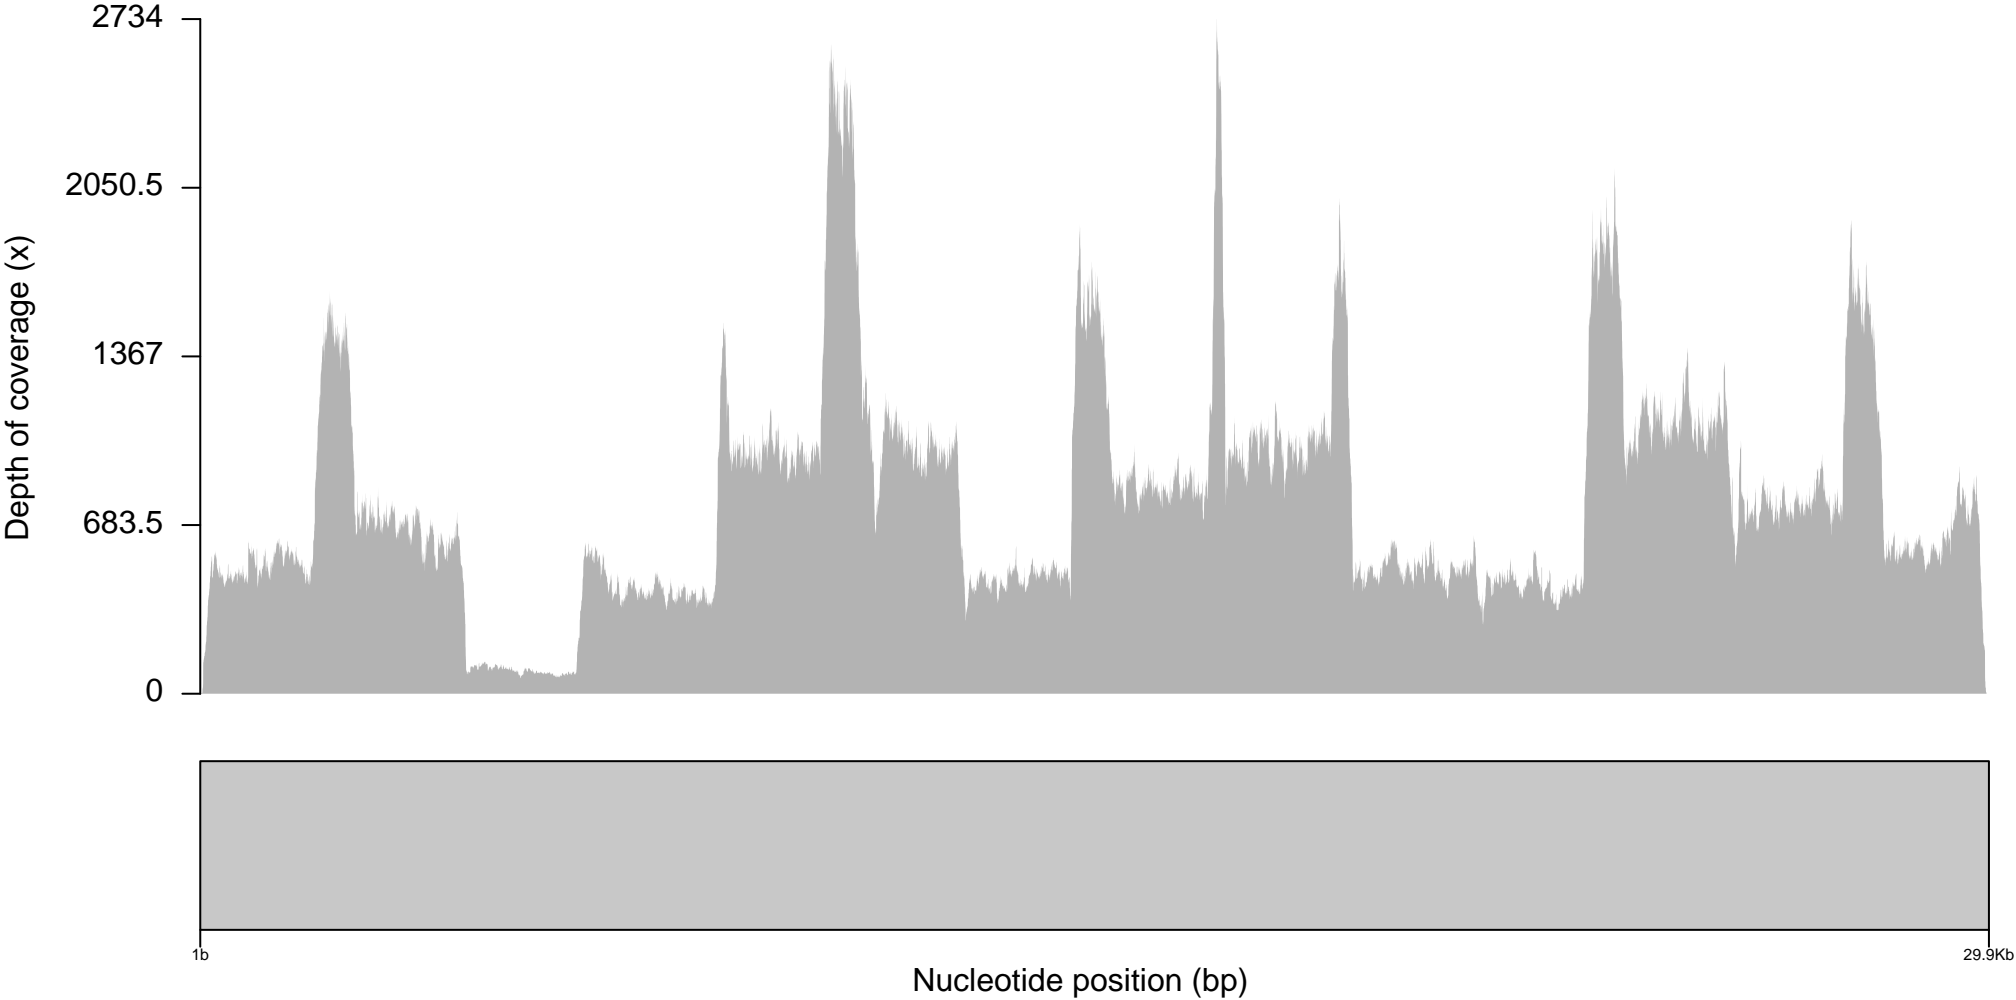

Sequencing depth of coverage for Sample: hCoV-19\_Brazil\_RS-HBM-39485\_2021

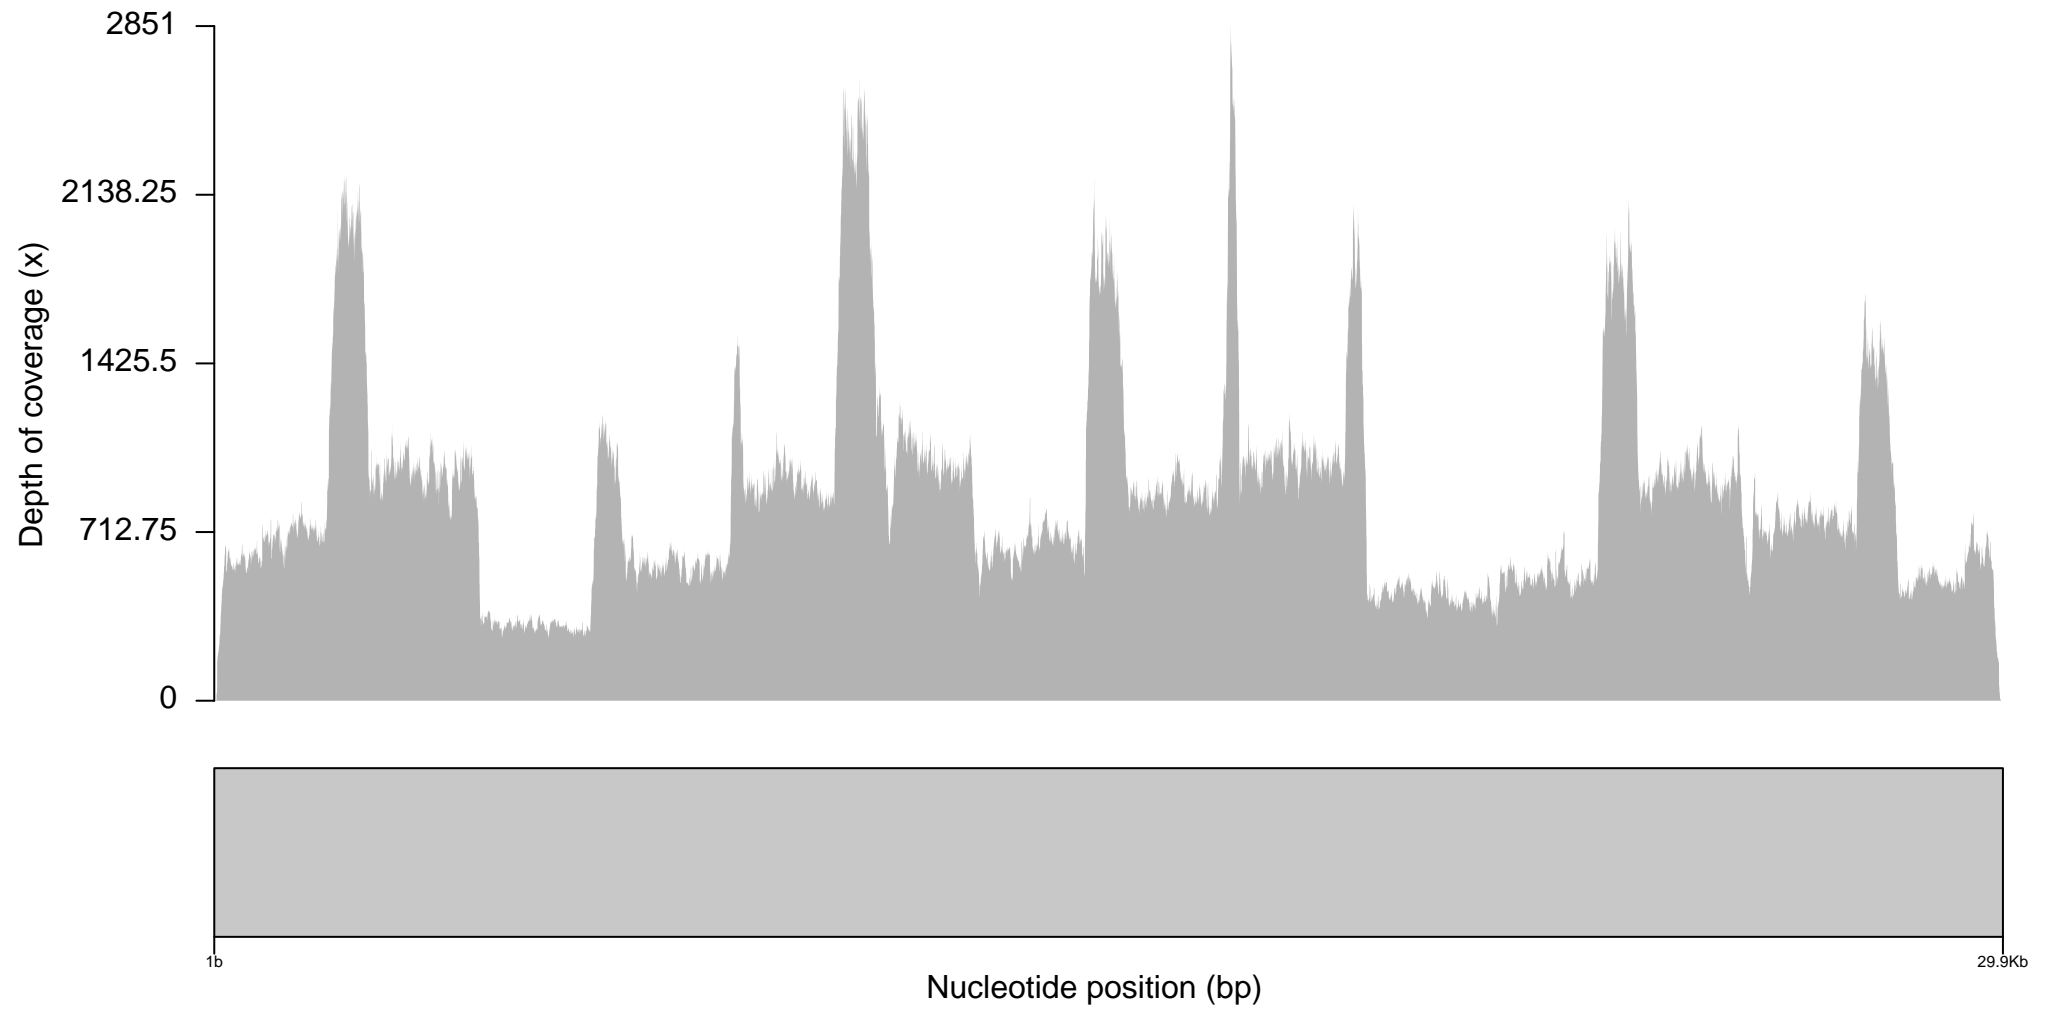

Sequencing depth of coverage for Sample: hCoV-19\_Brazil\_RS-HBM-39486\_2021

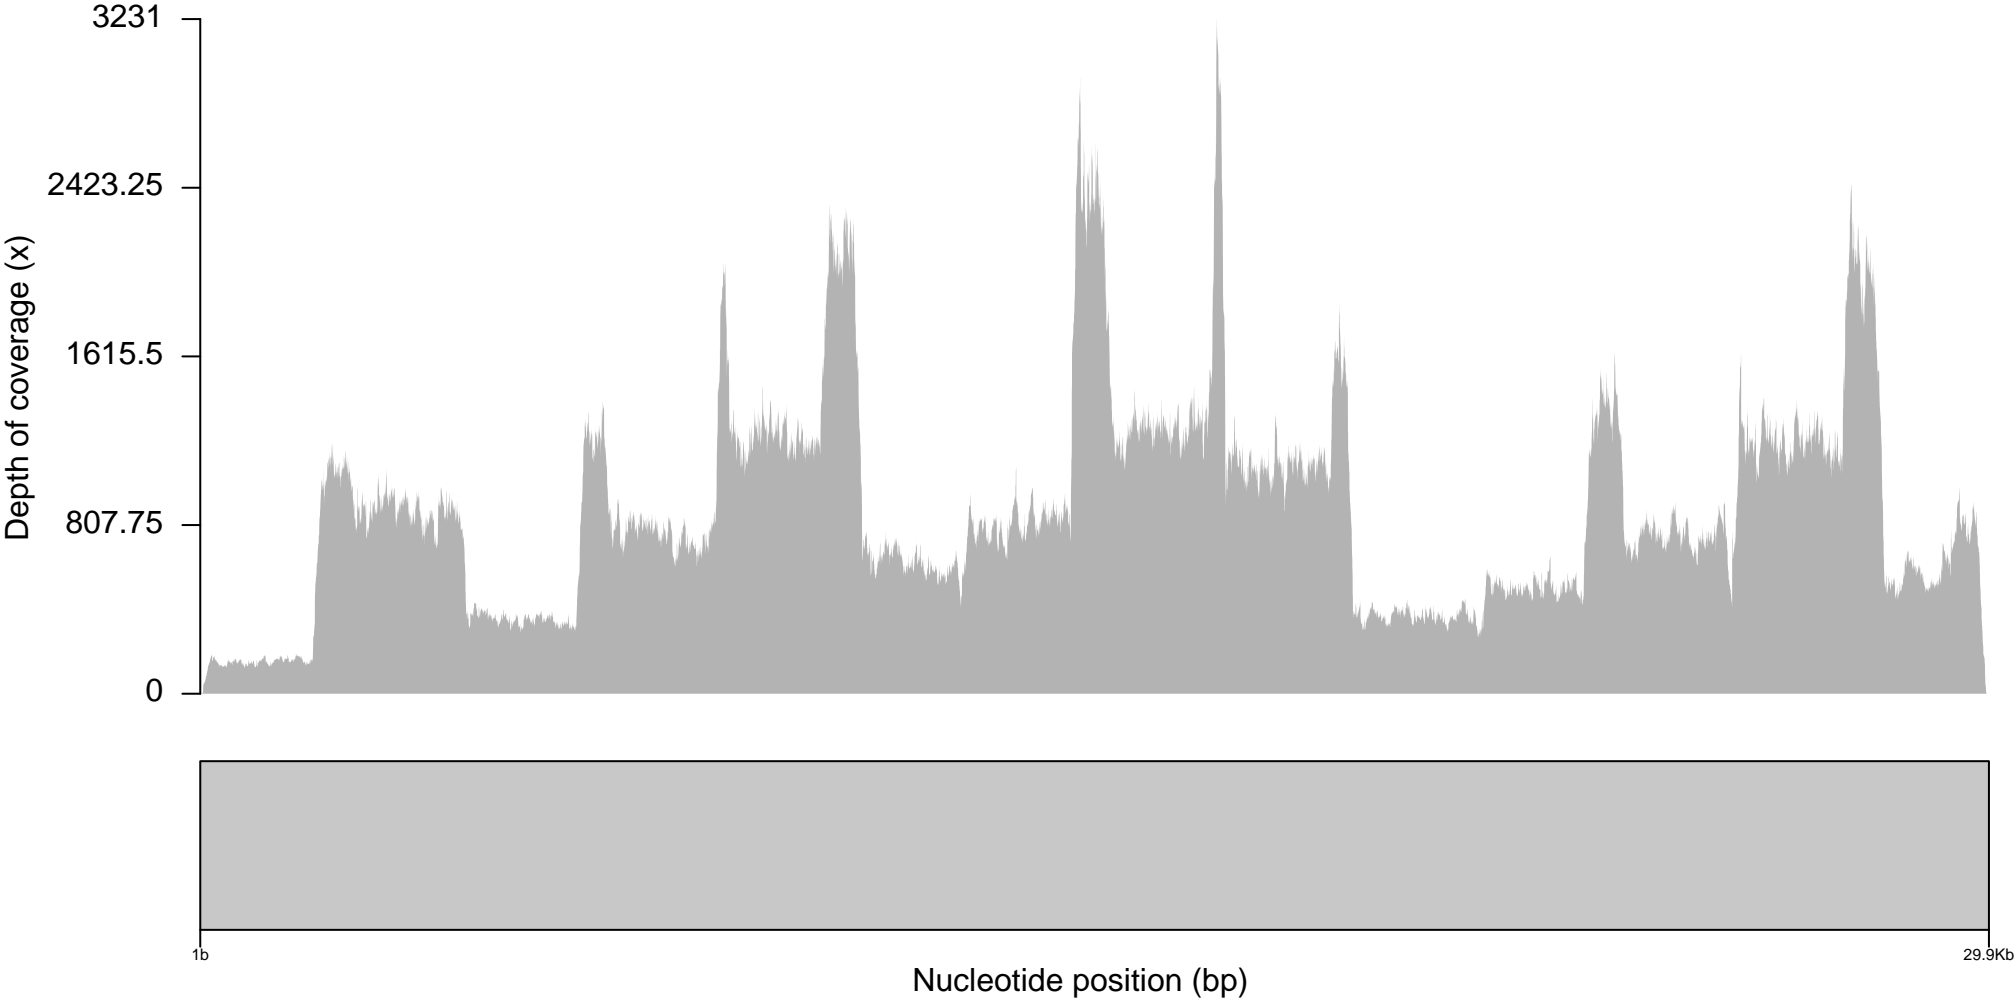

Sequencing depth of coverage for Sample: hCoV-19\_Brazil\_RS-HBM-39487\_2021

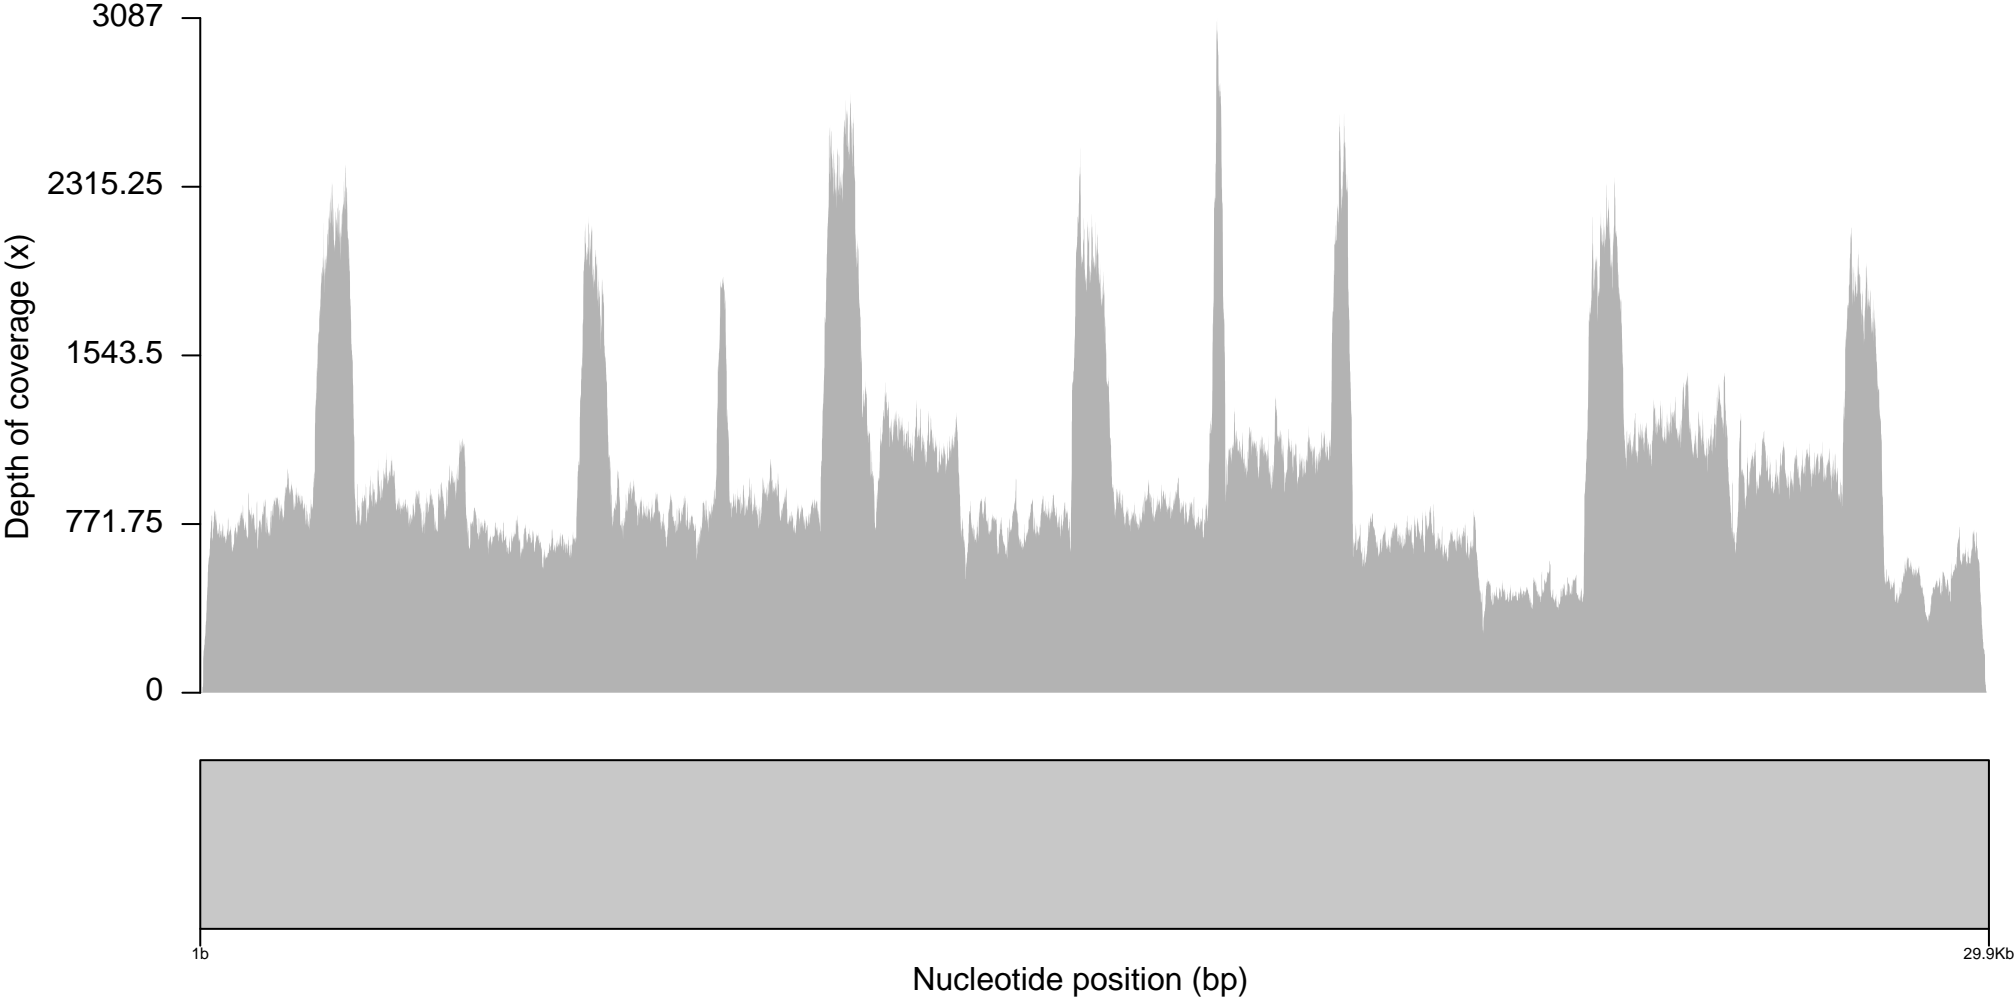

Sequencing depth of coverage for Sample: hCoV-19\_Brazil\_RS-HBM-39488\_2021

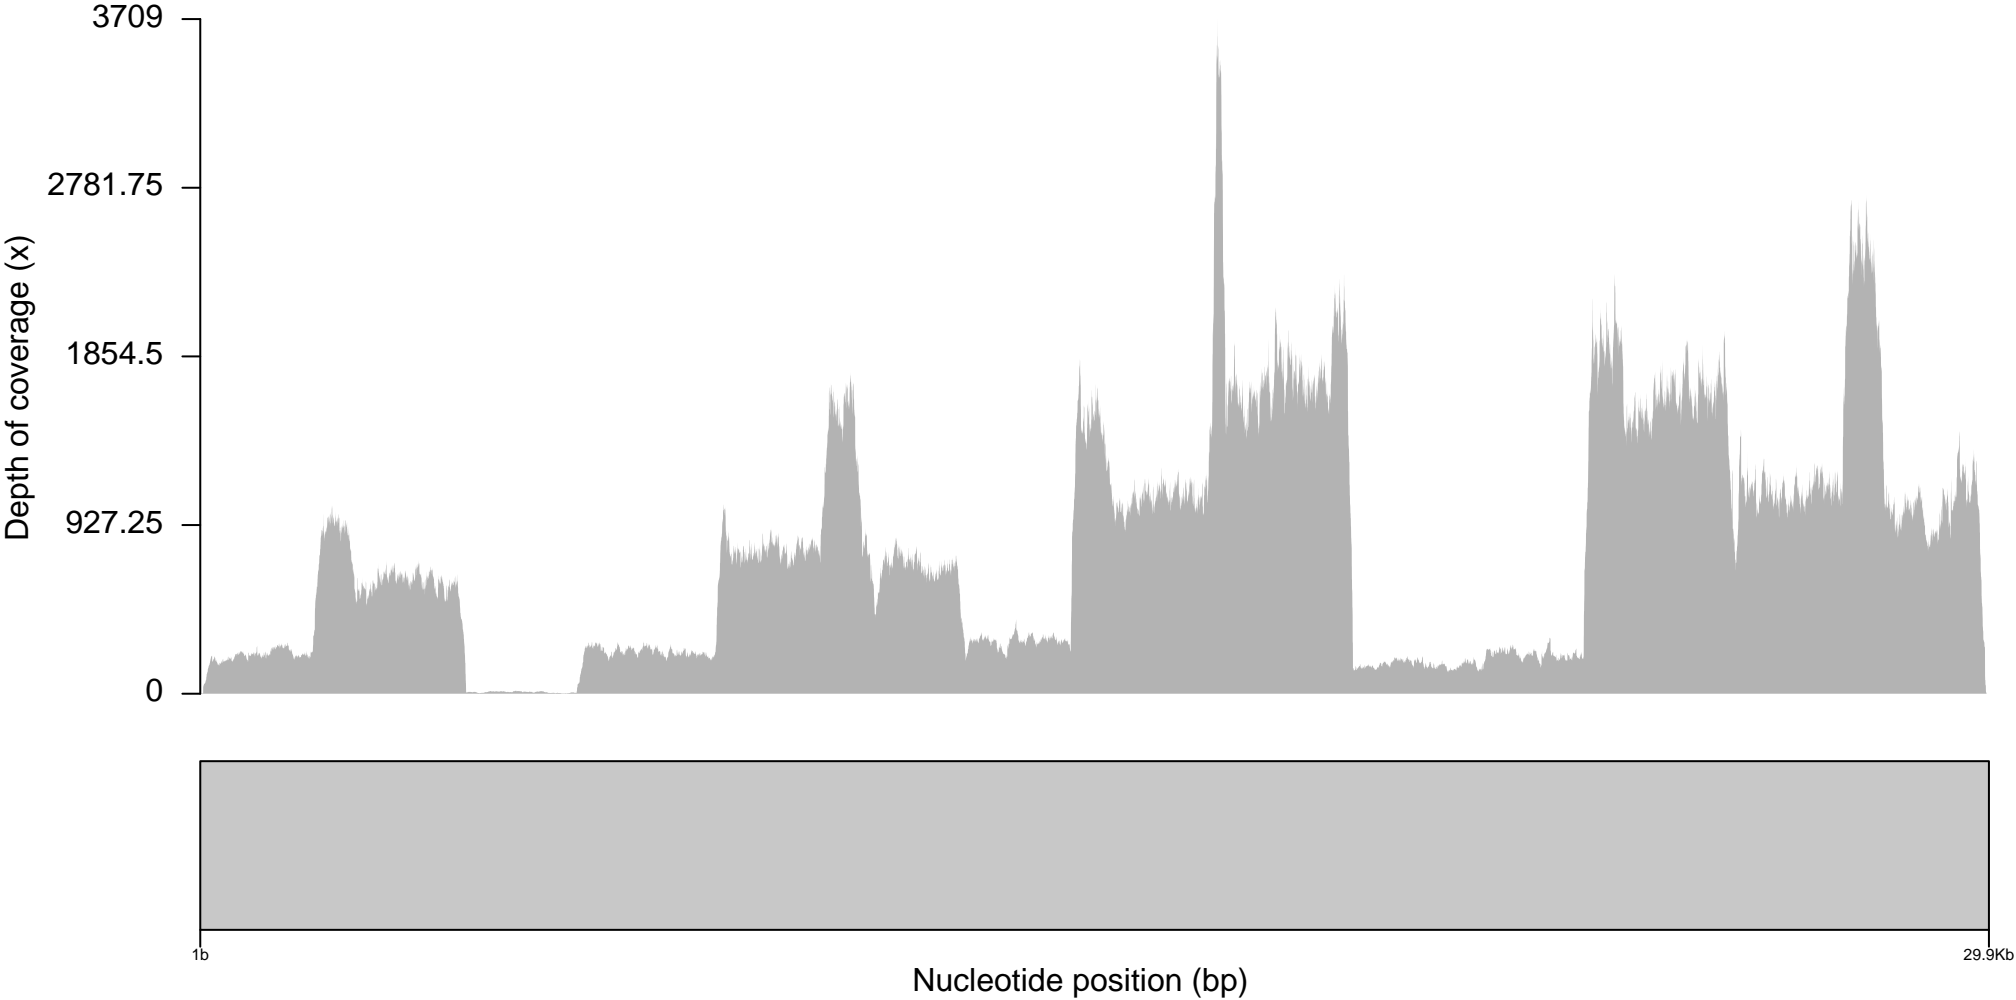

Sequencing depth of coverage for Sample: hCoV-19\_Brazil\_RS-HBM-39489\_2021

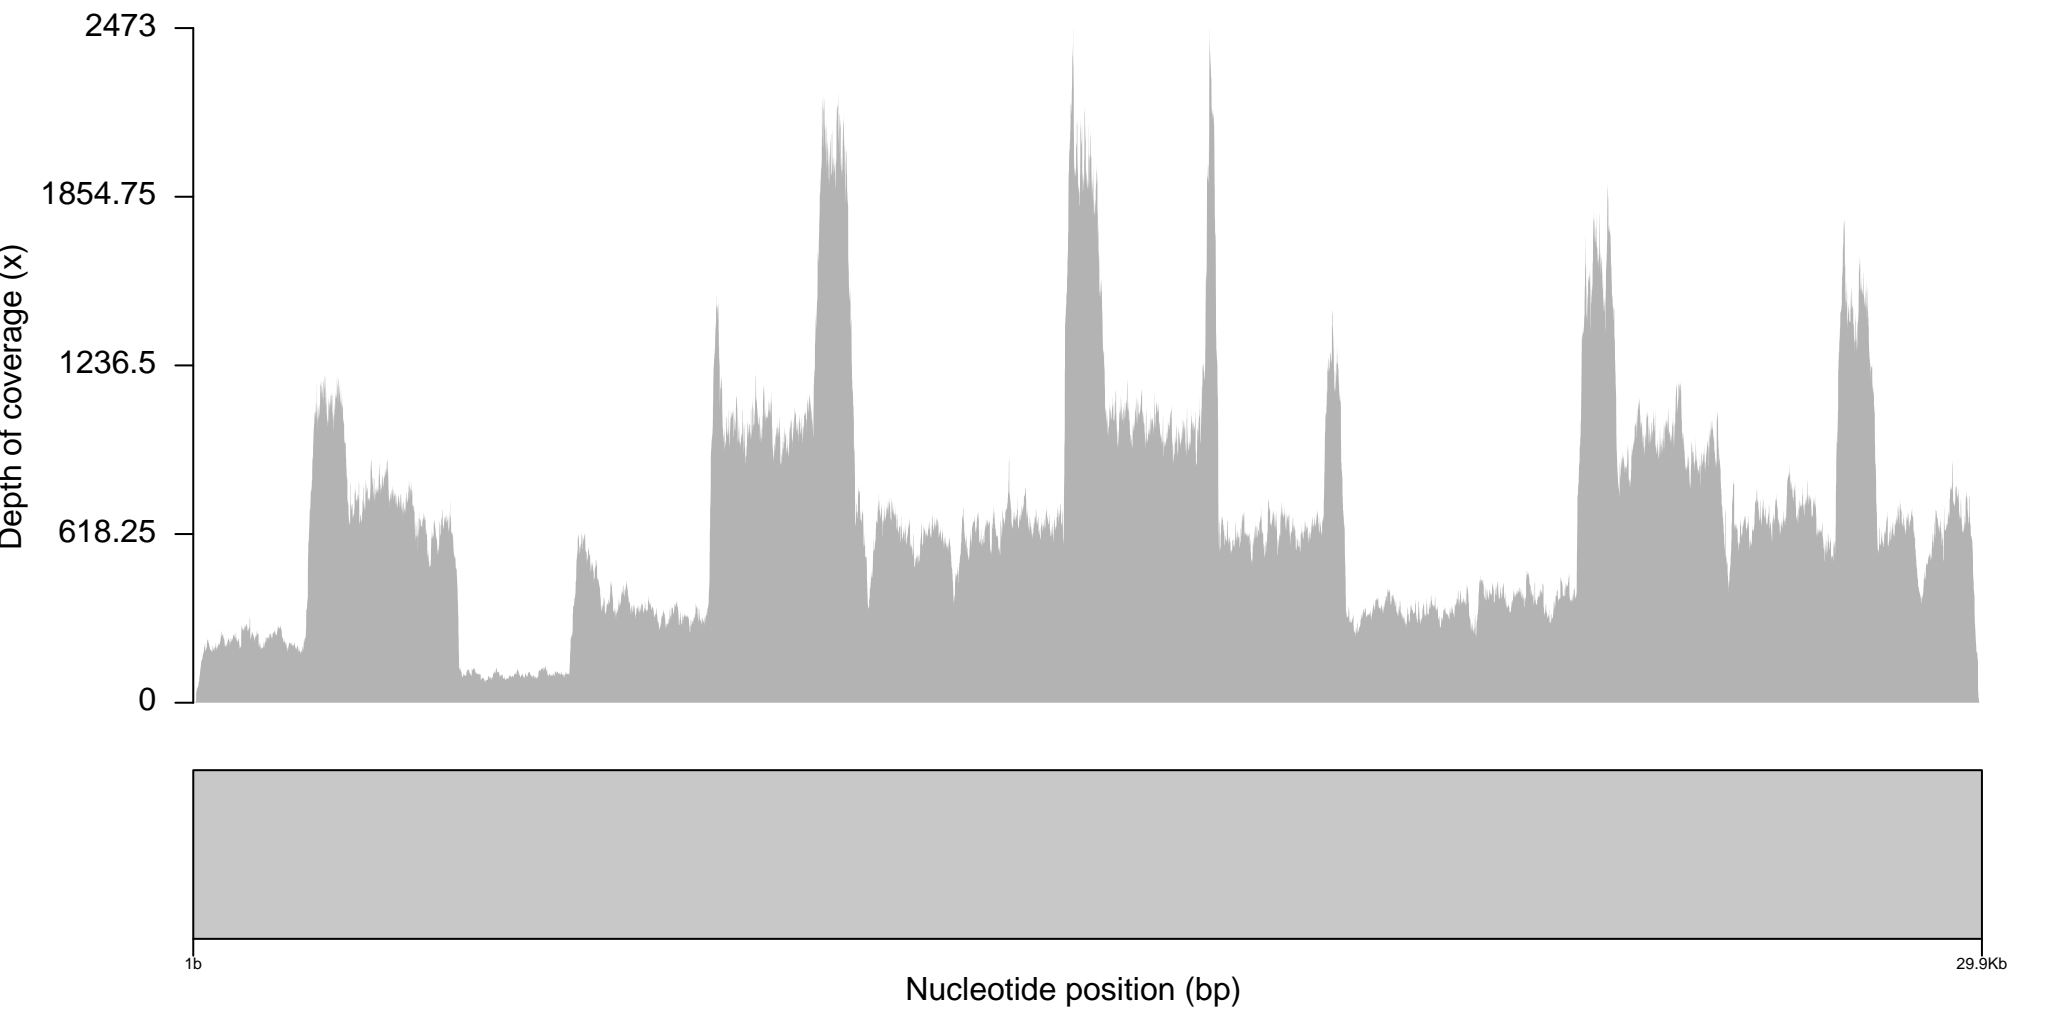

Sequencing depth of coverage for Sample: hCoV-19\_Brazil\_RS-HBM-39490\_2021

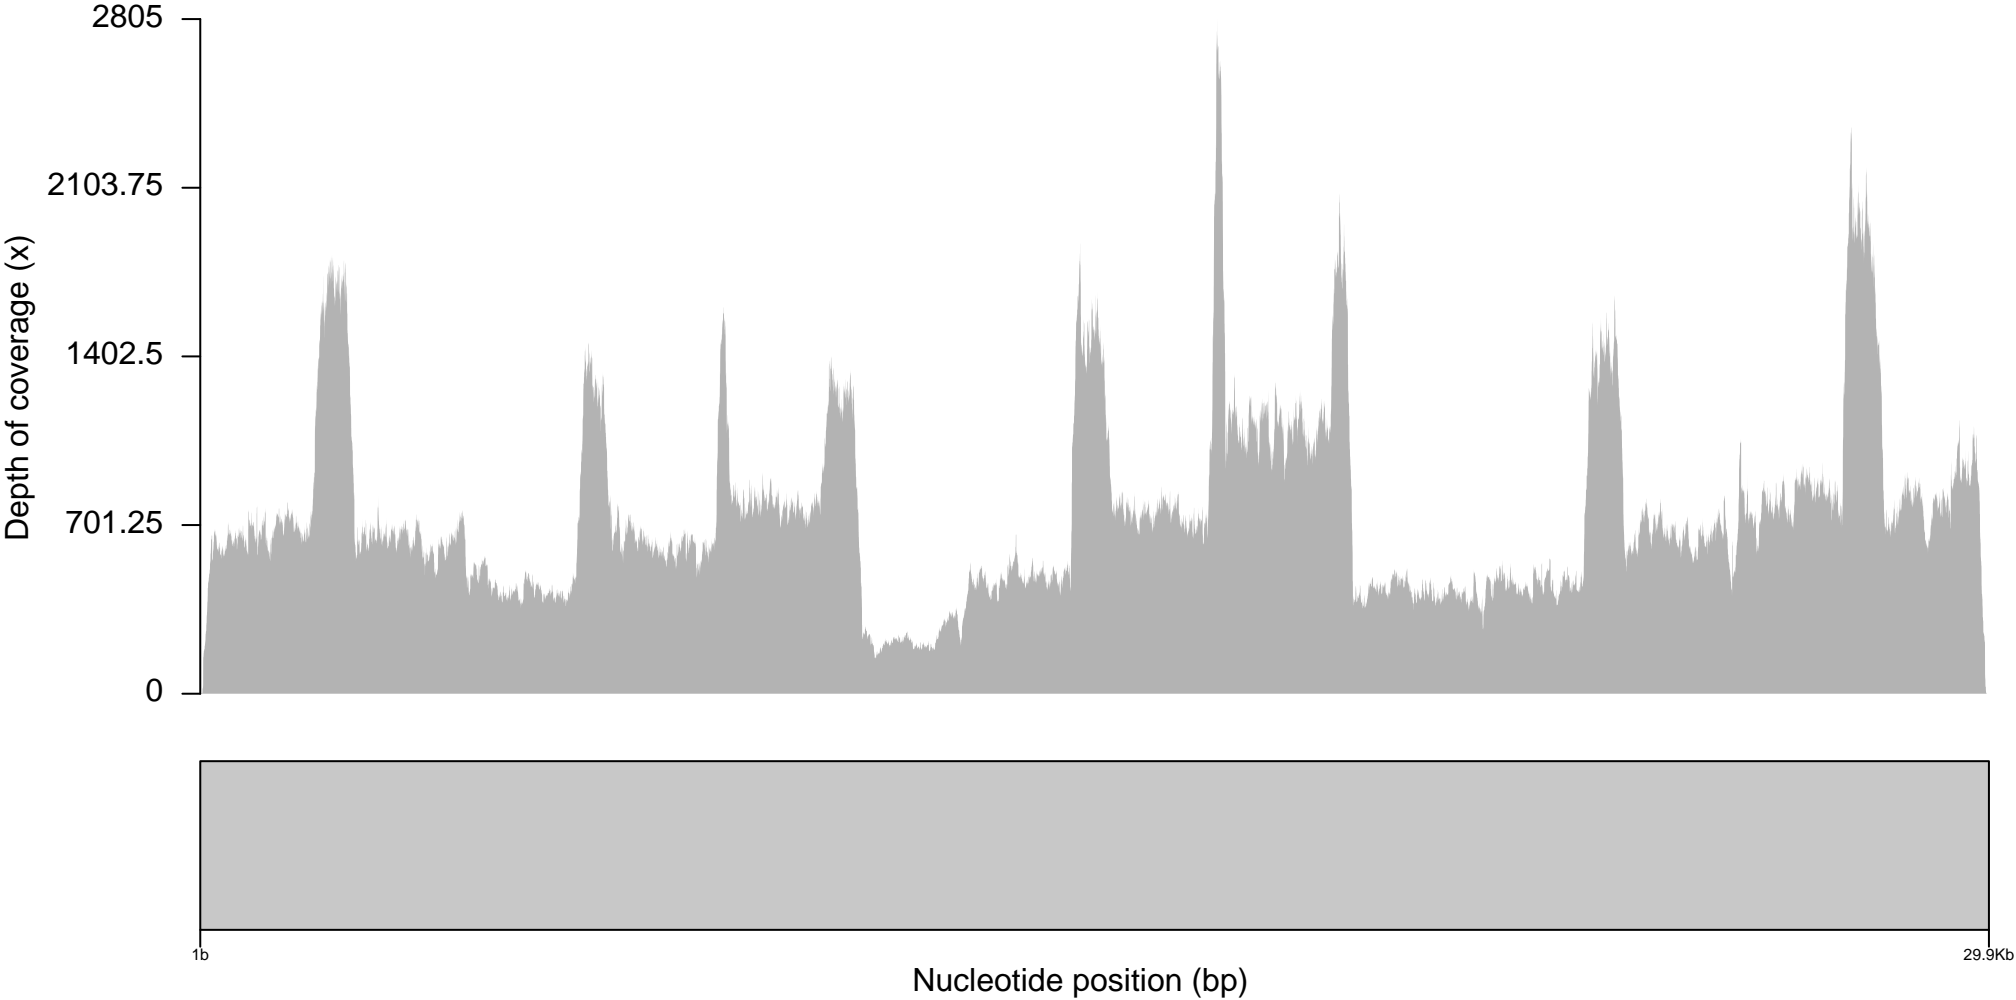

Sequencing depth of coverage for Sample: hCoV-19\_Brazil\_RS-HBM-39491\_2021

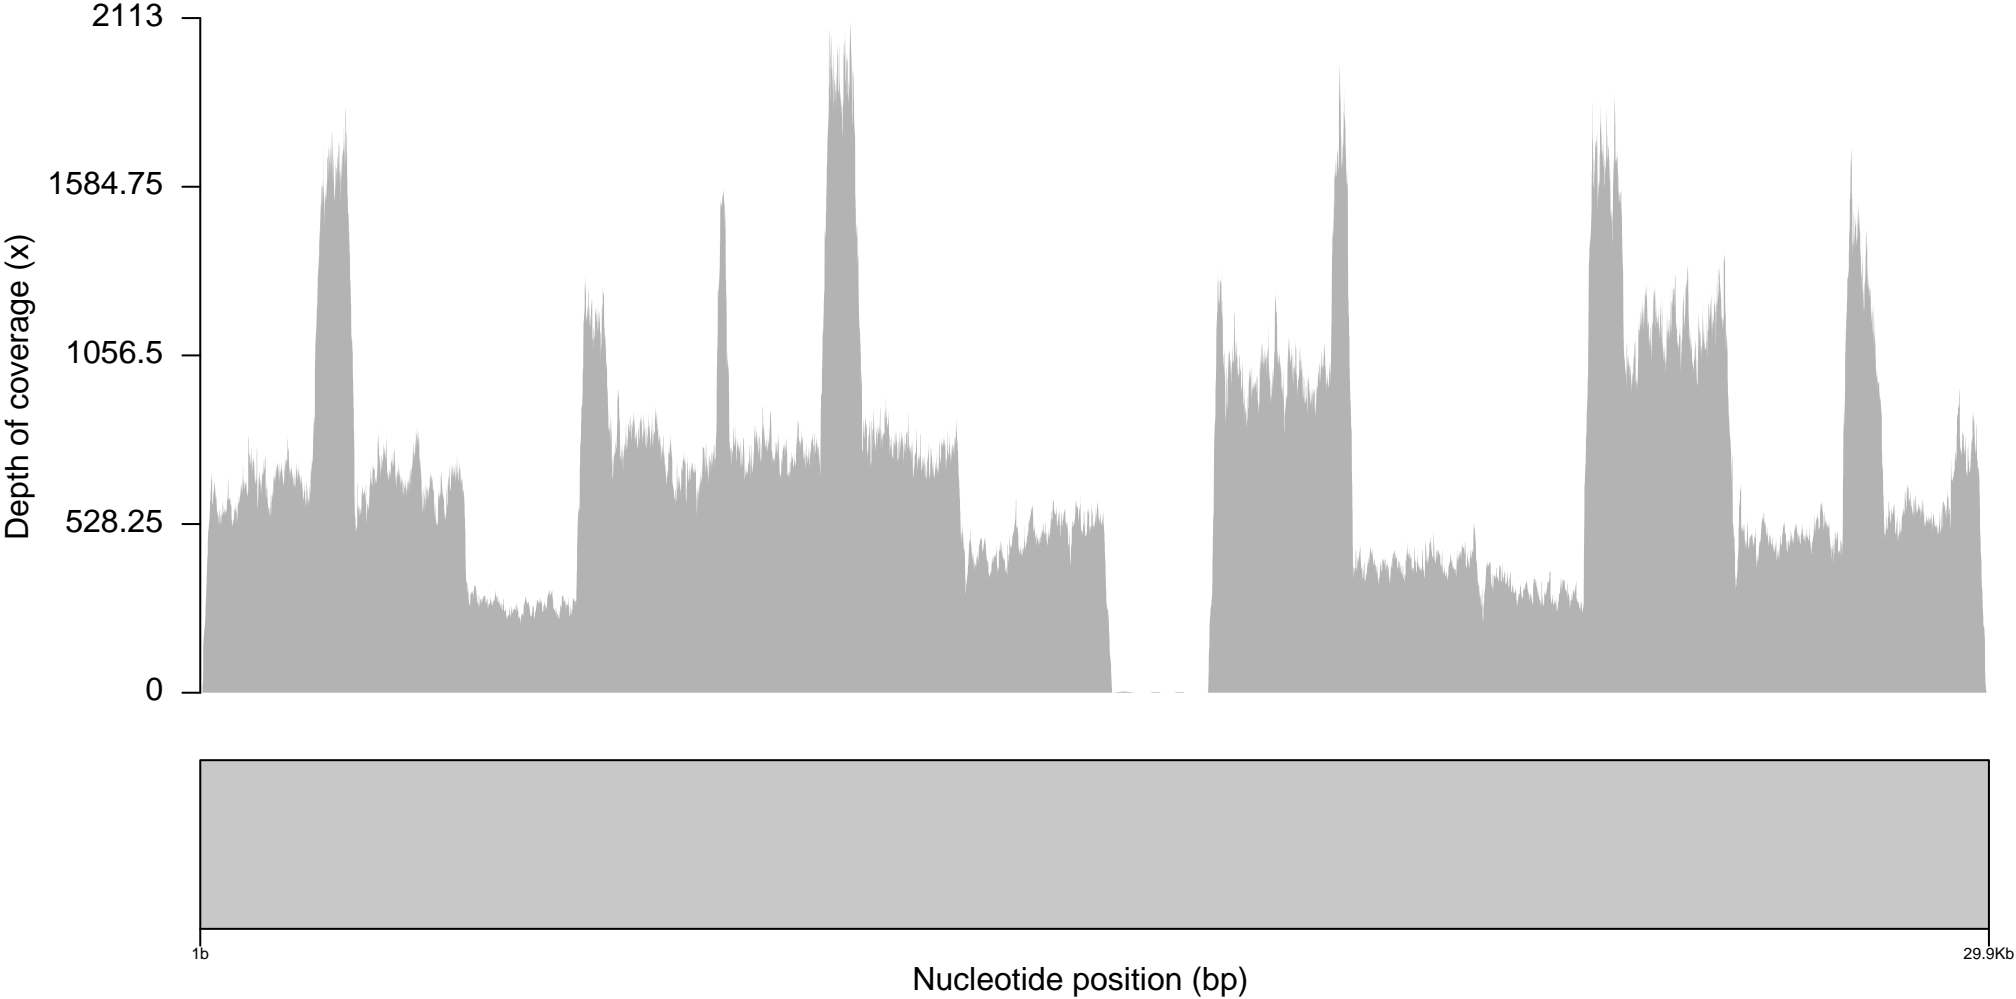

Sequencing depth of coverage for Sample: hCoV-19\_Brazil\_RS-HBM-39492\_2021

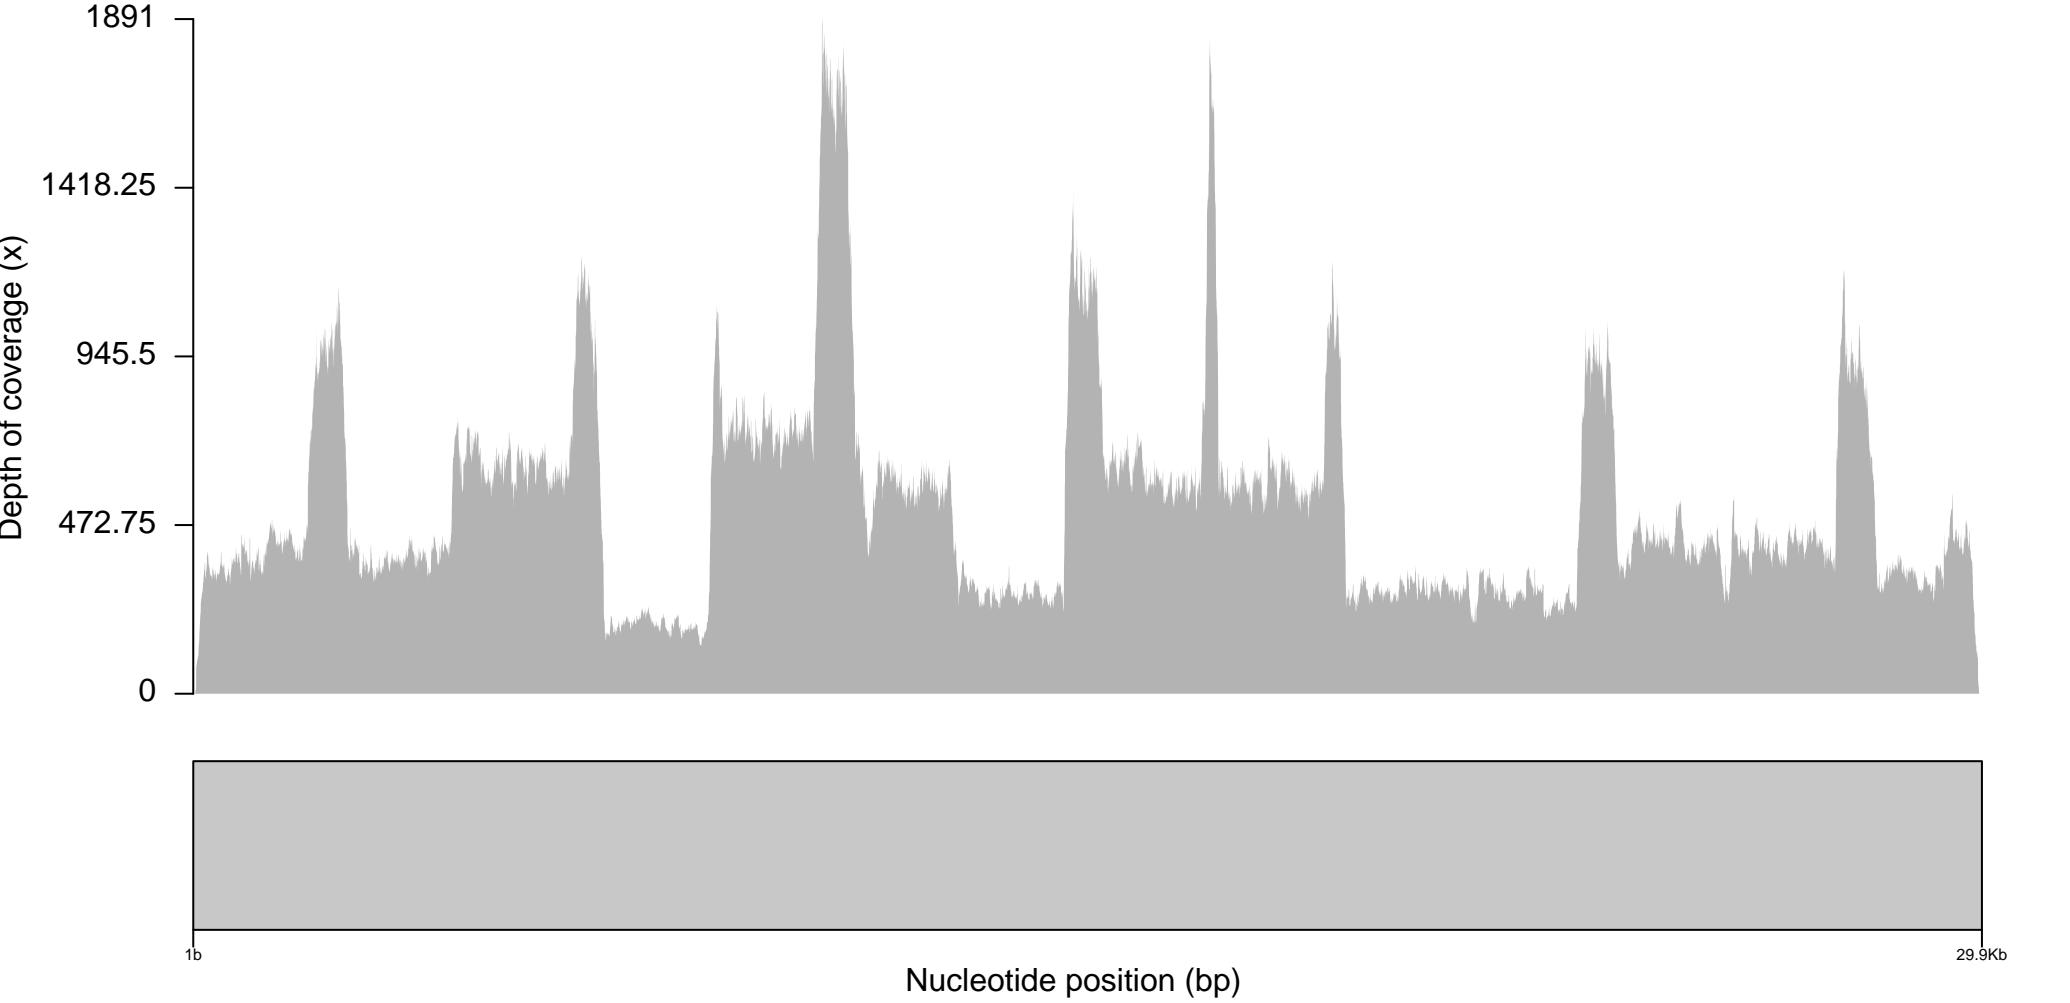

Sequencing depth of coverage for Sample: hCoV-19\_Brazil\_RS-HBM-39493\_2021

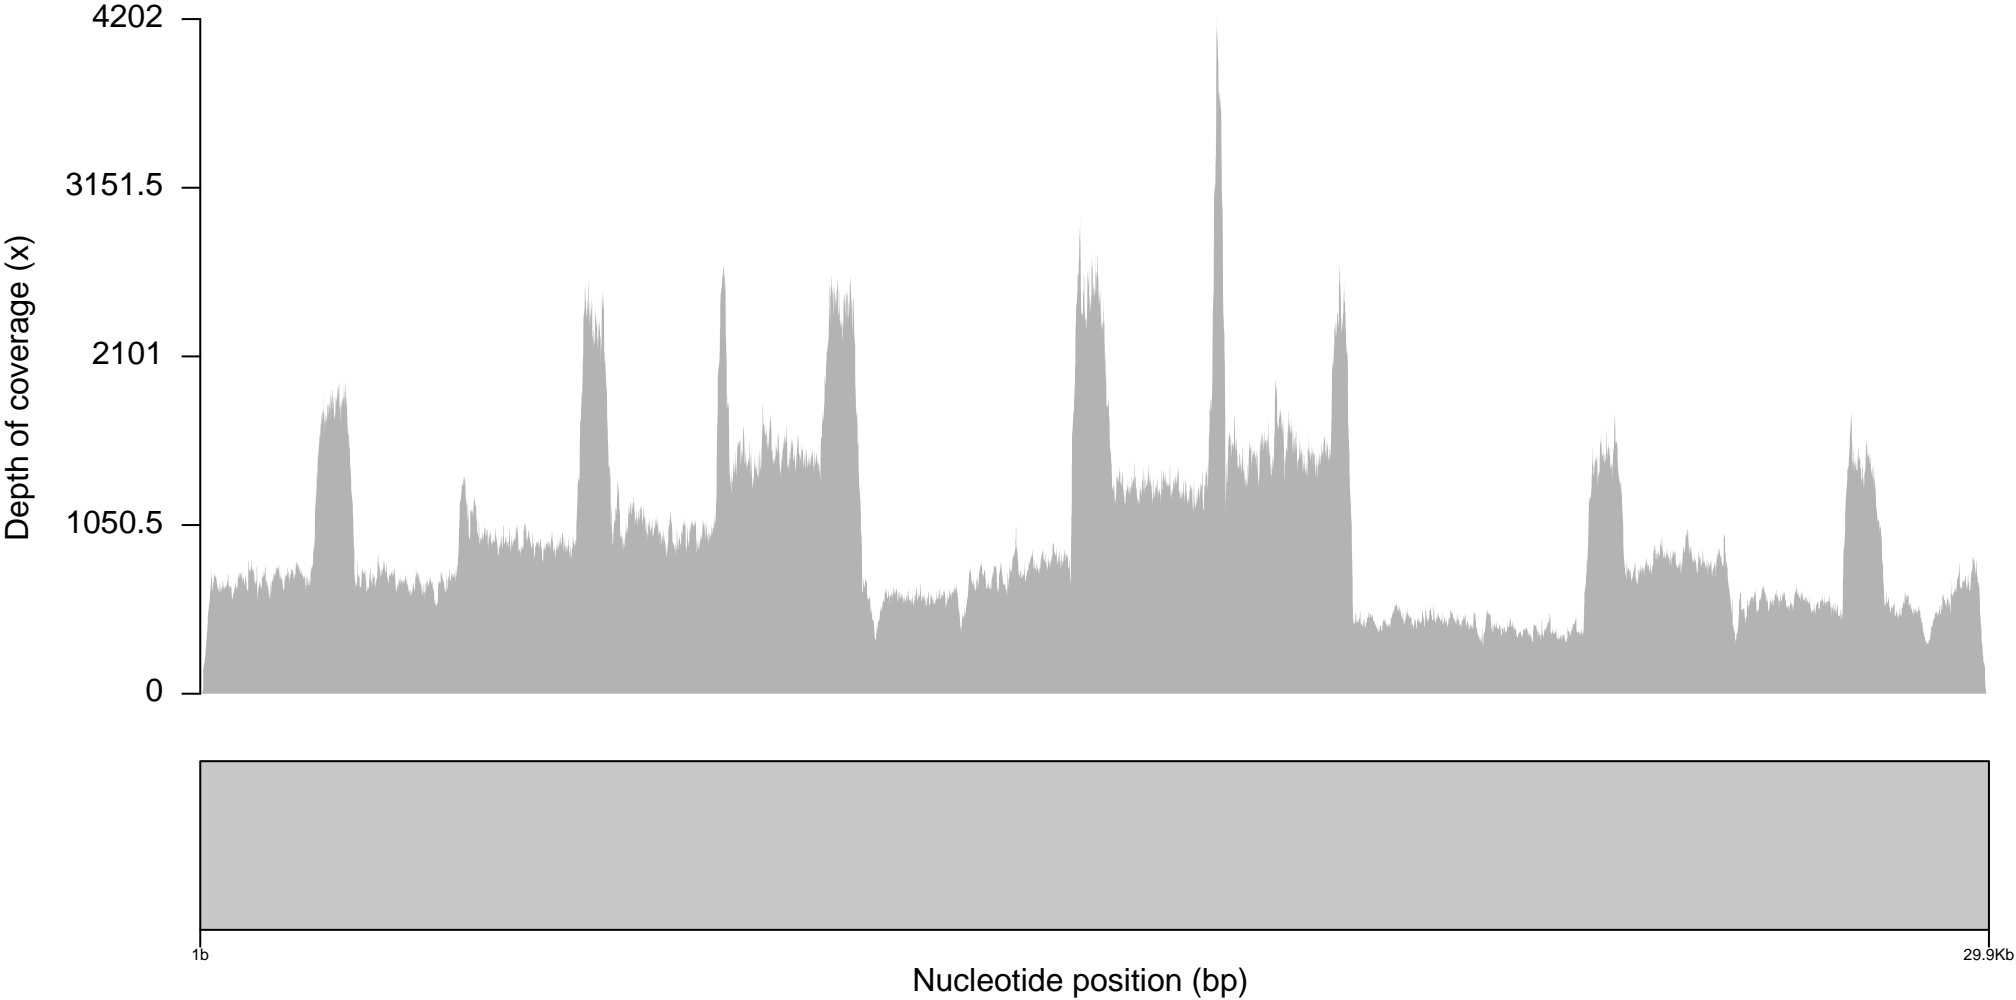

Sequencing depth of coverage for Sample: hCoV-19\_Brazil\_RS-HBM-39494\_2021

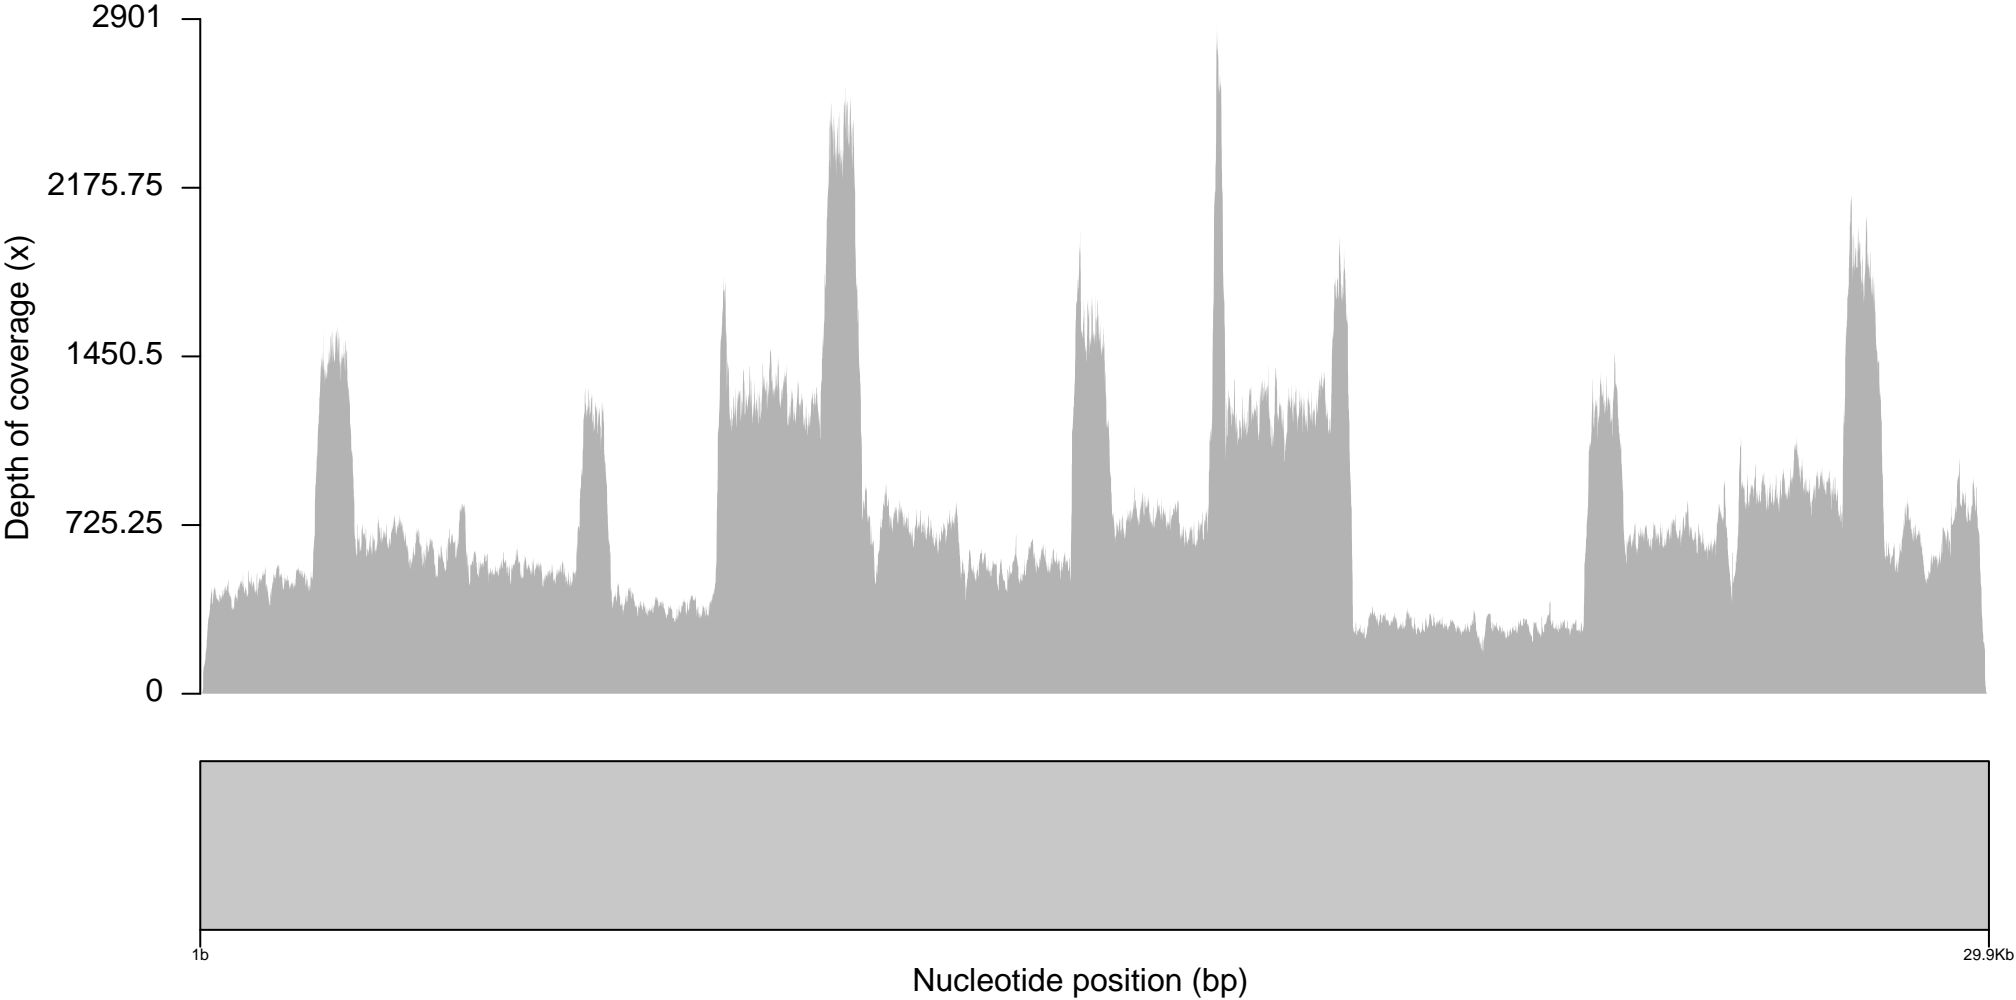

Sequencing depth of coverage for Sample: hCoV-19\_Brazil\_RS-HBM-39495\_2021

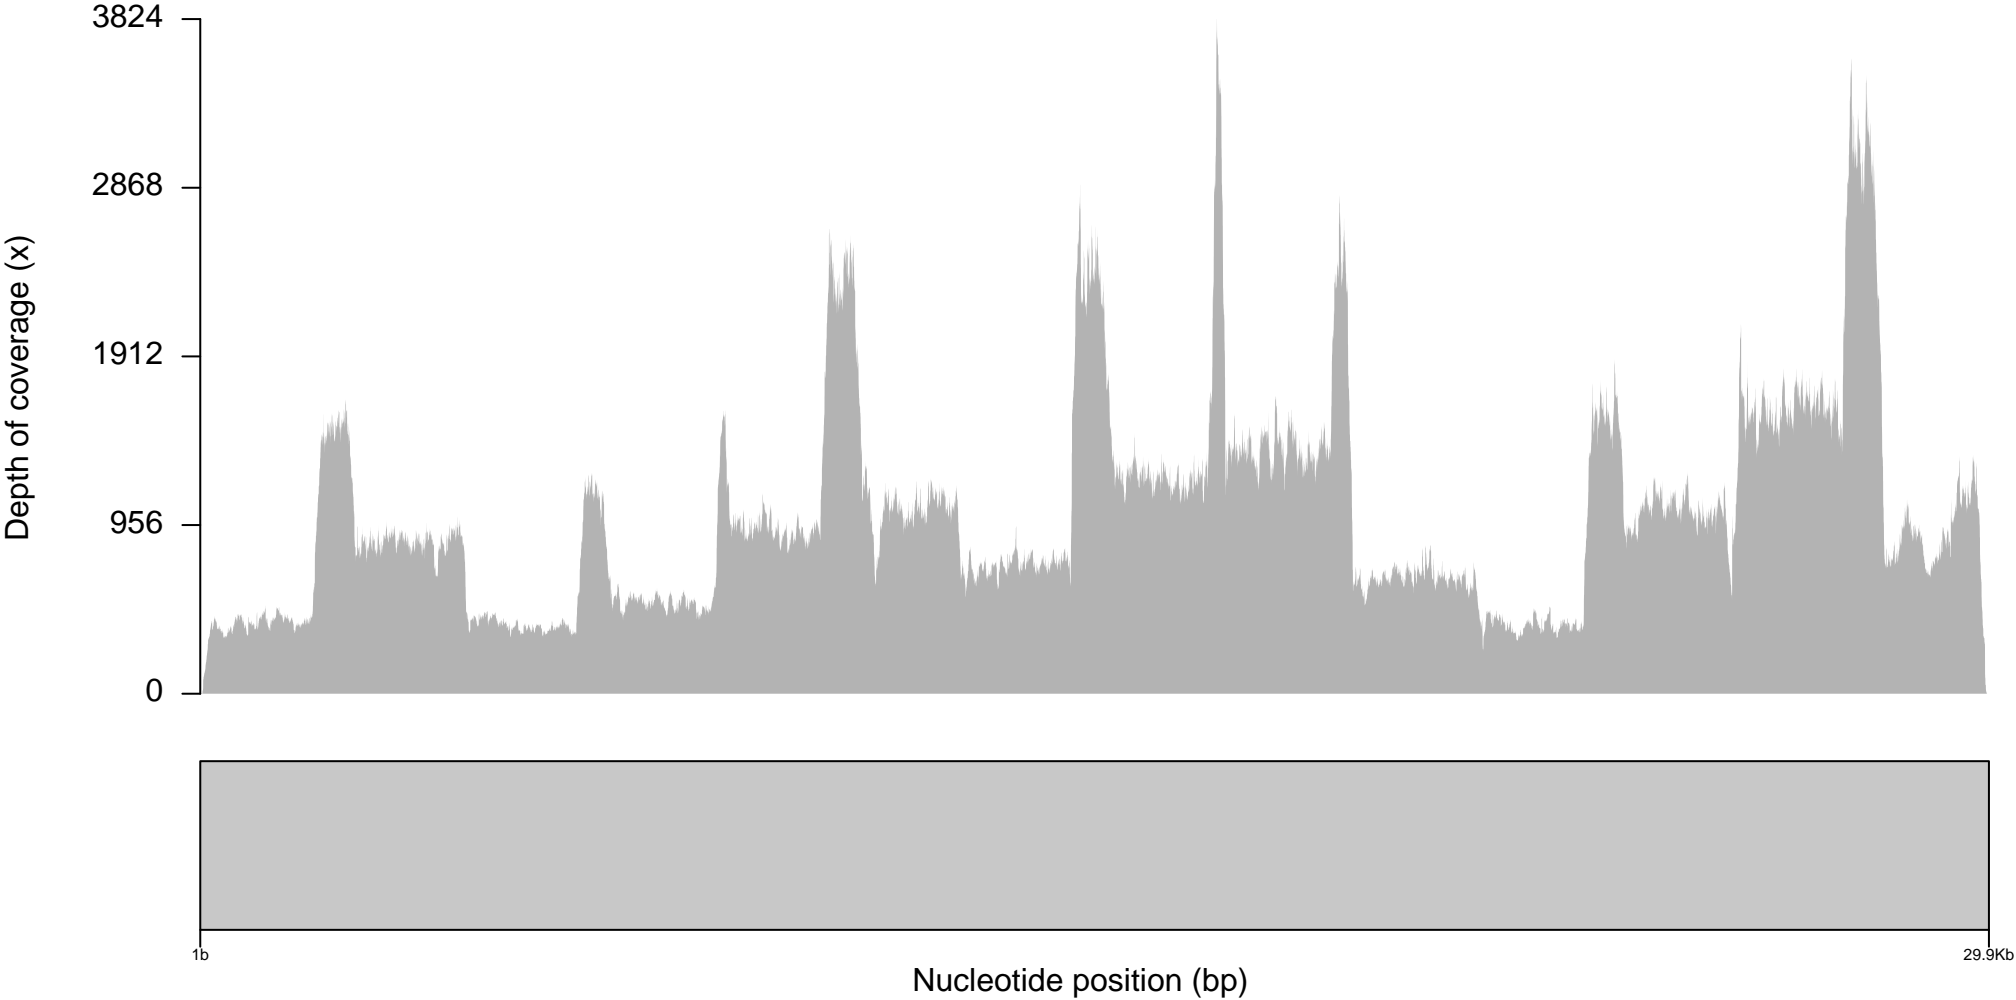

Sequencing depth of coverage for Sample: hCoV-19\_Brazil\_RS-HBM-39496\_2021

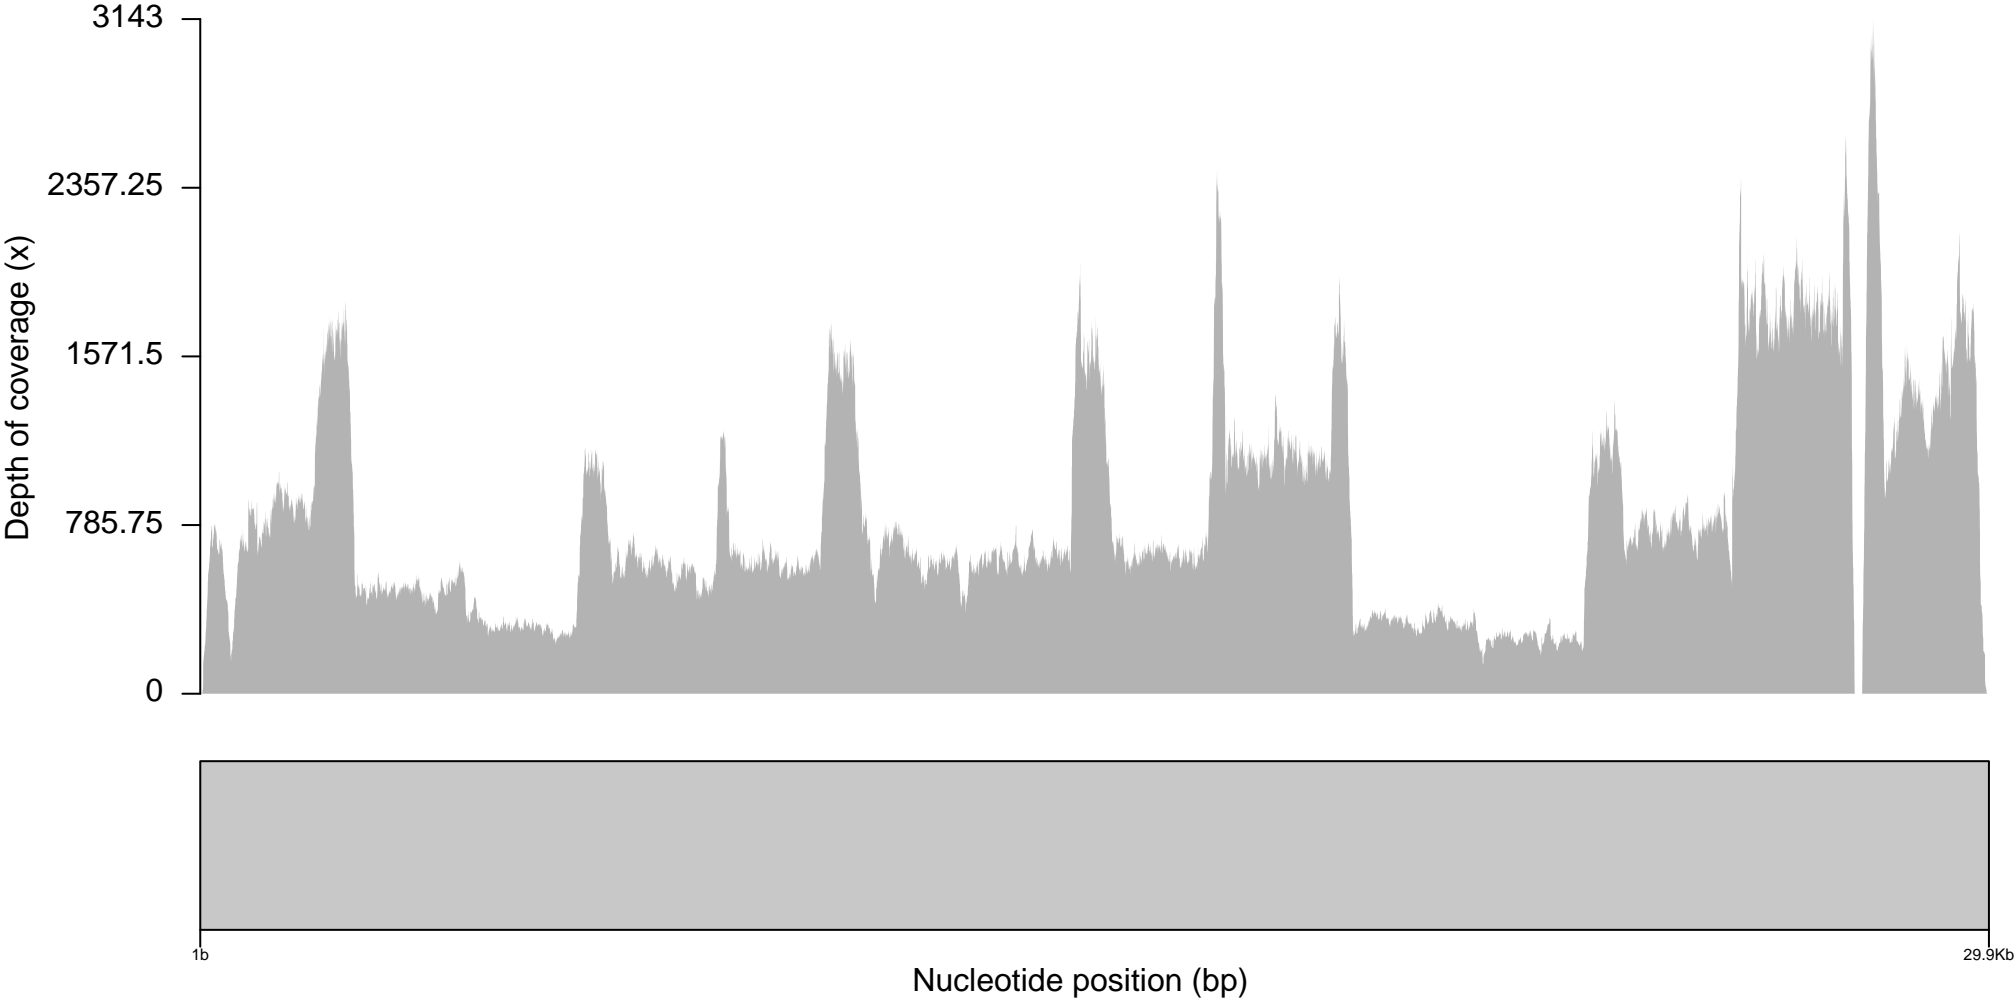

Sequencing depth of coverage for Sample: hCoV-19\_Brazil\_RS-HBM-39497\_2021

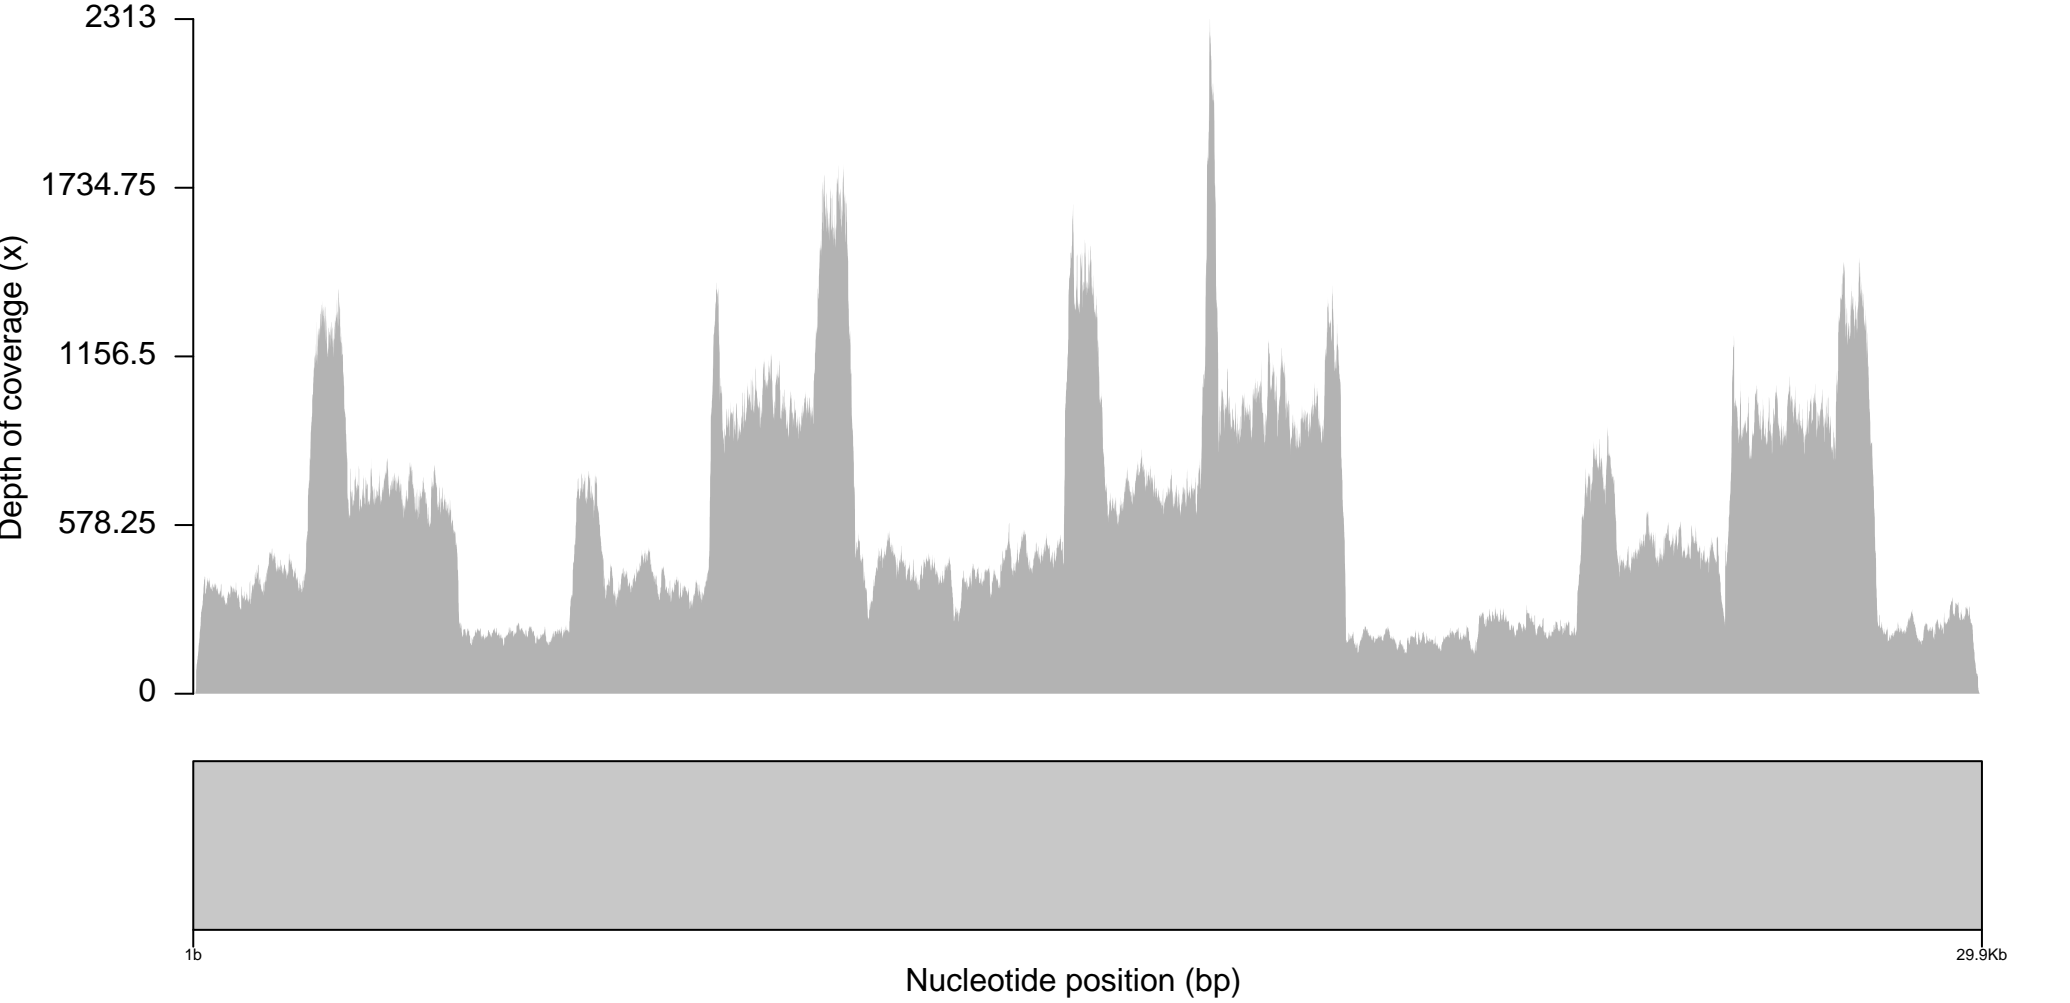

Sequencing depth of coverage for Sample: hCoV-19\_Brazil\_RS-HBM-39498\_2021

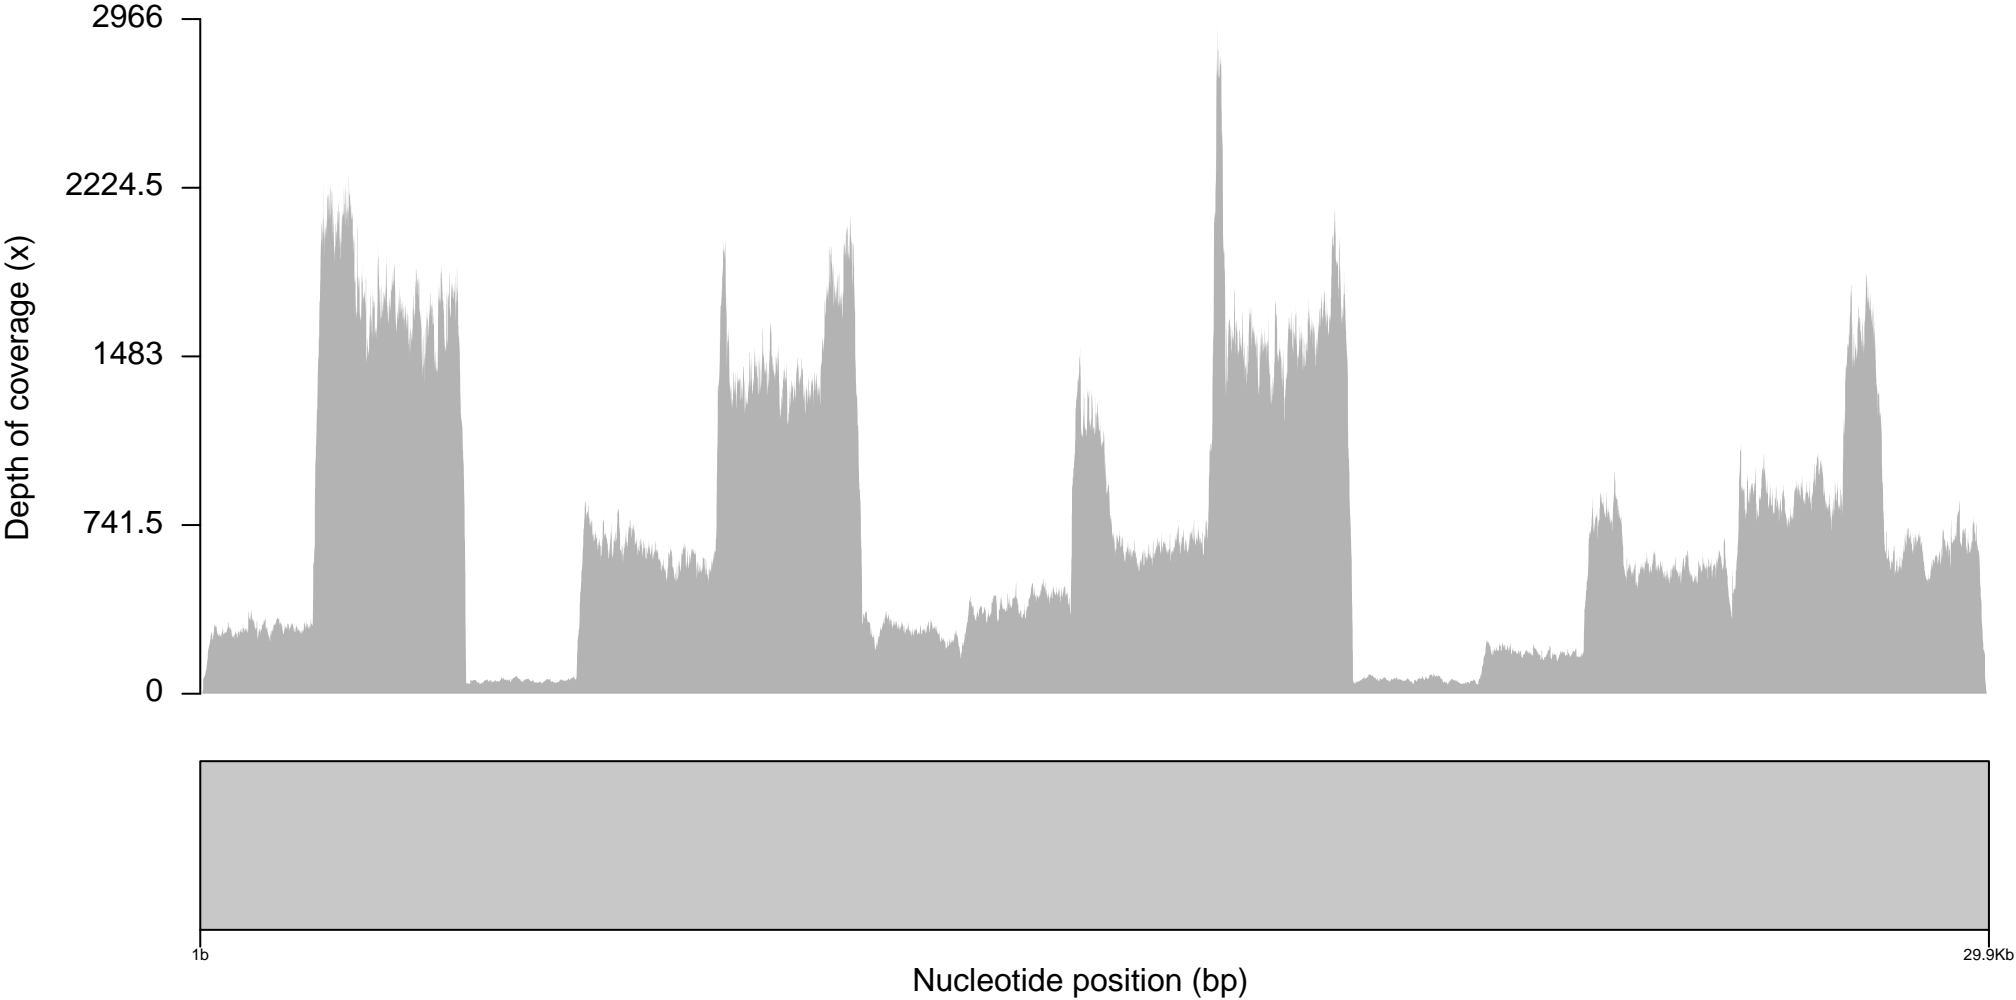

Sequencing depth of coverage for Sample: hCoV-19\_Brazil\_RS-HBM-39499\_2021

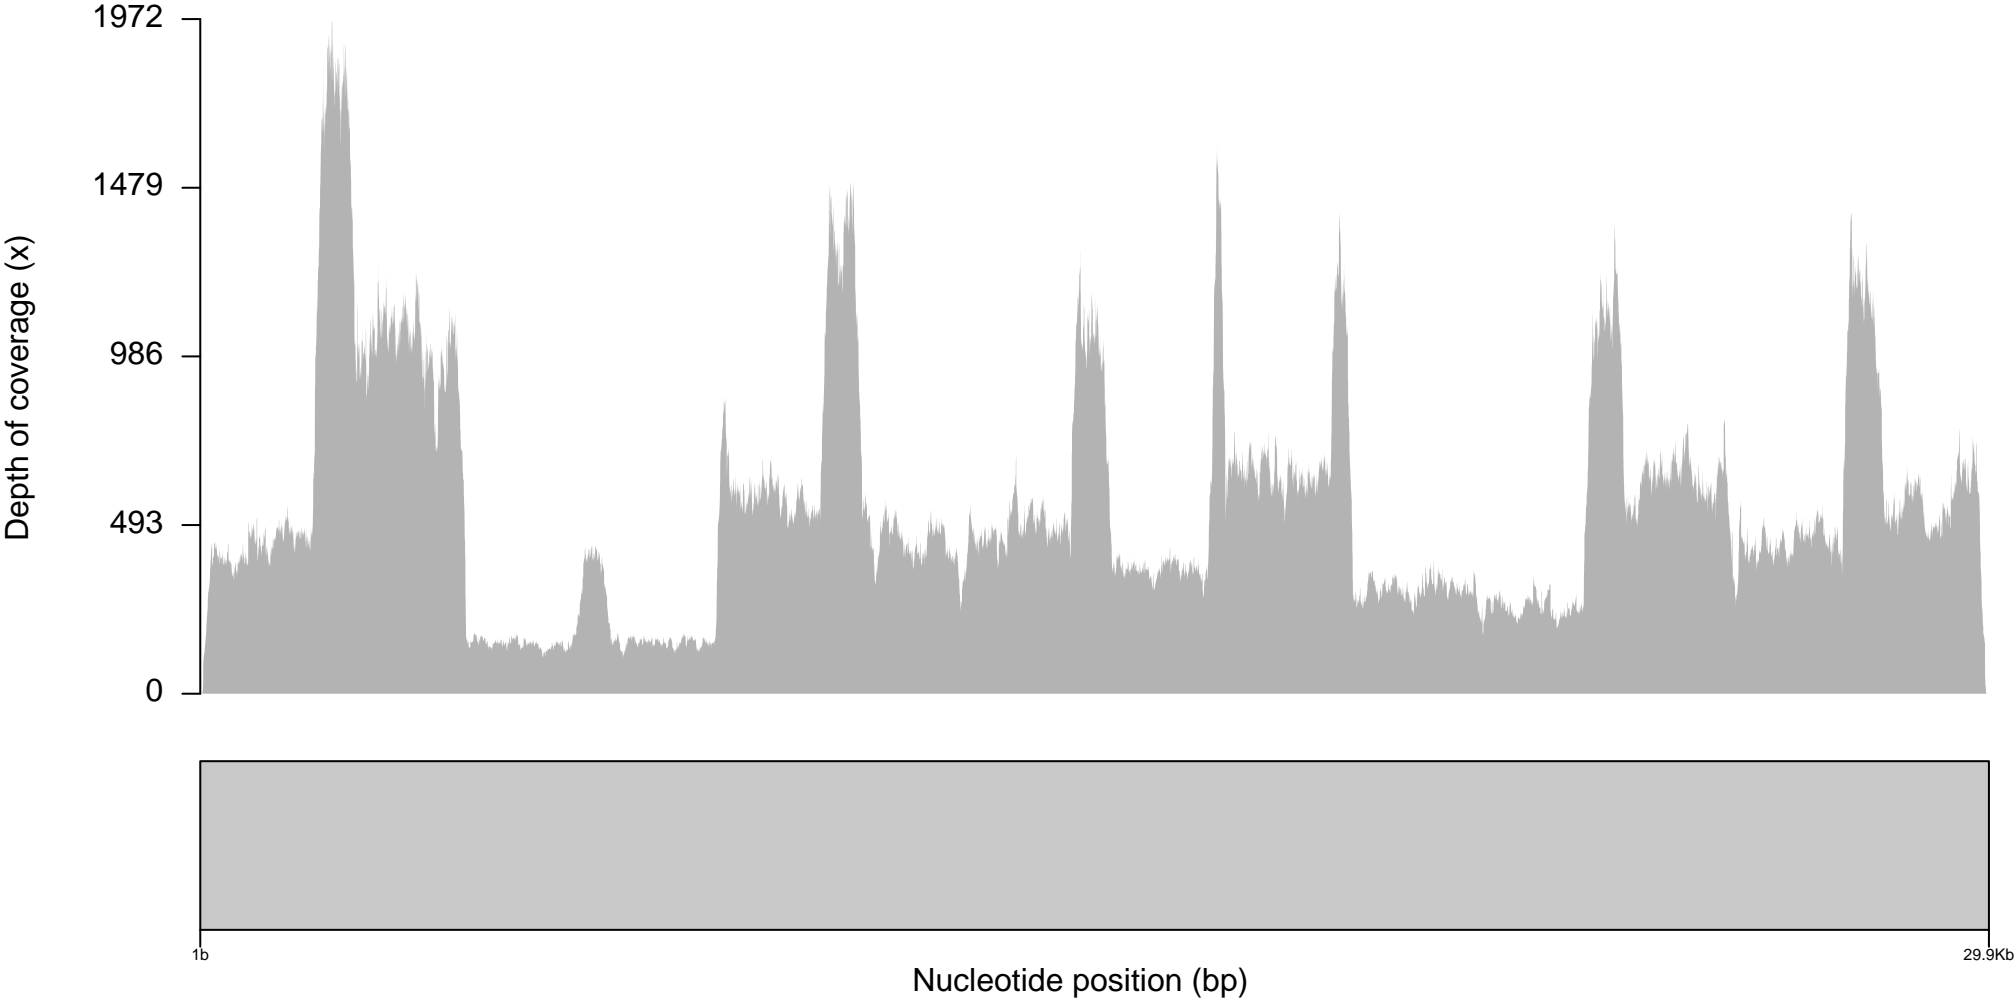

Sequencing depth of coverage for Sample: hCoV-19\_Brazil\_RS-HBM-39500\_2021

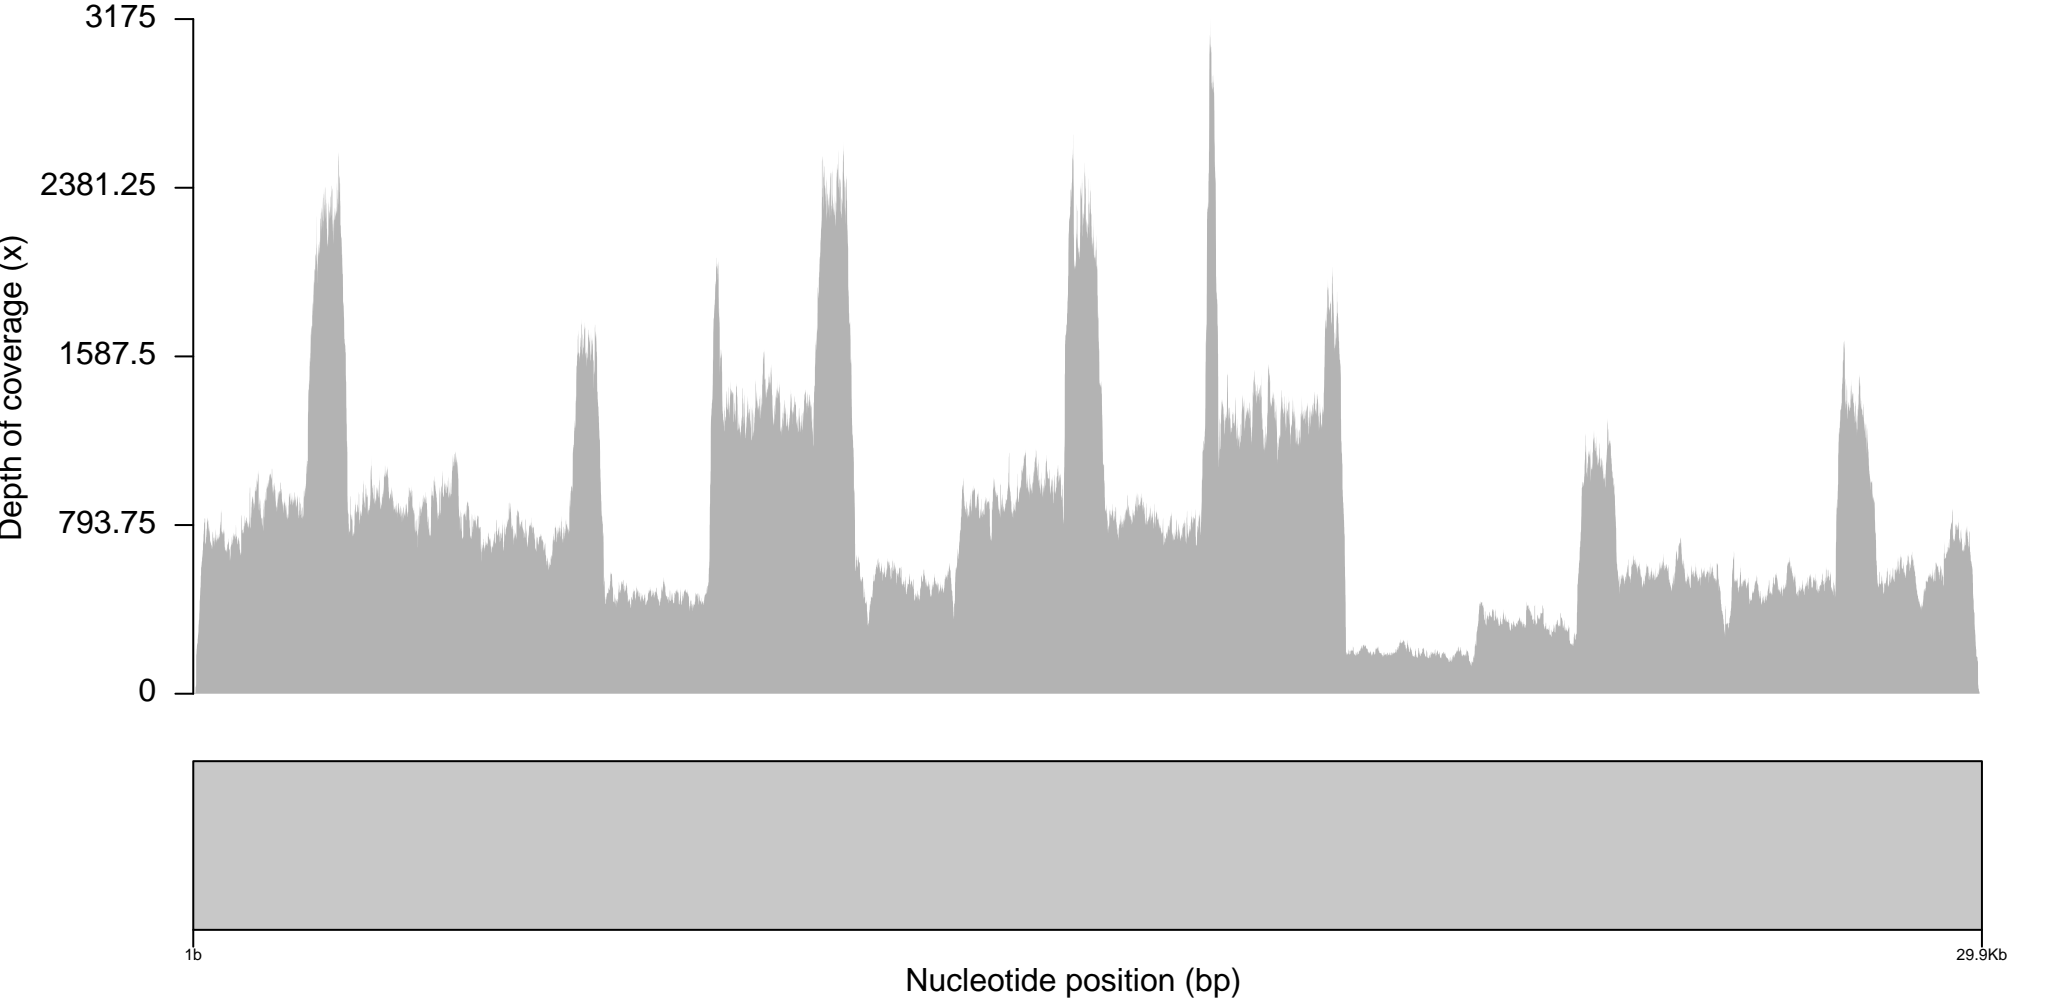

Sequencing depth of coverage for Sample: hCoV-19\_Brazil\_RS-HBM-39501\_2021

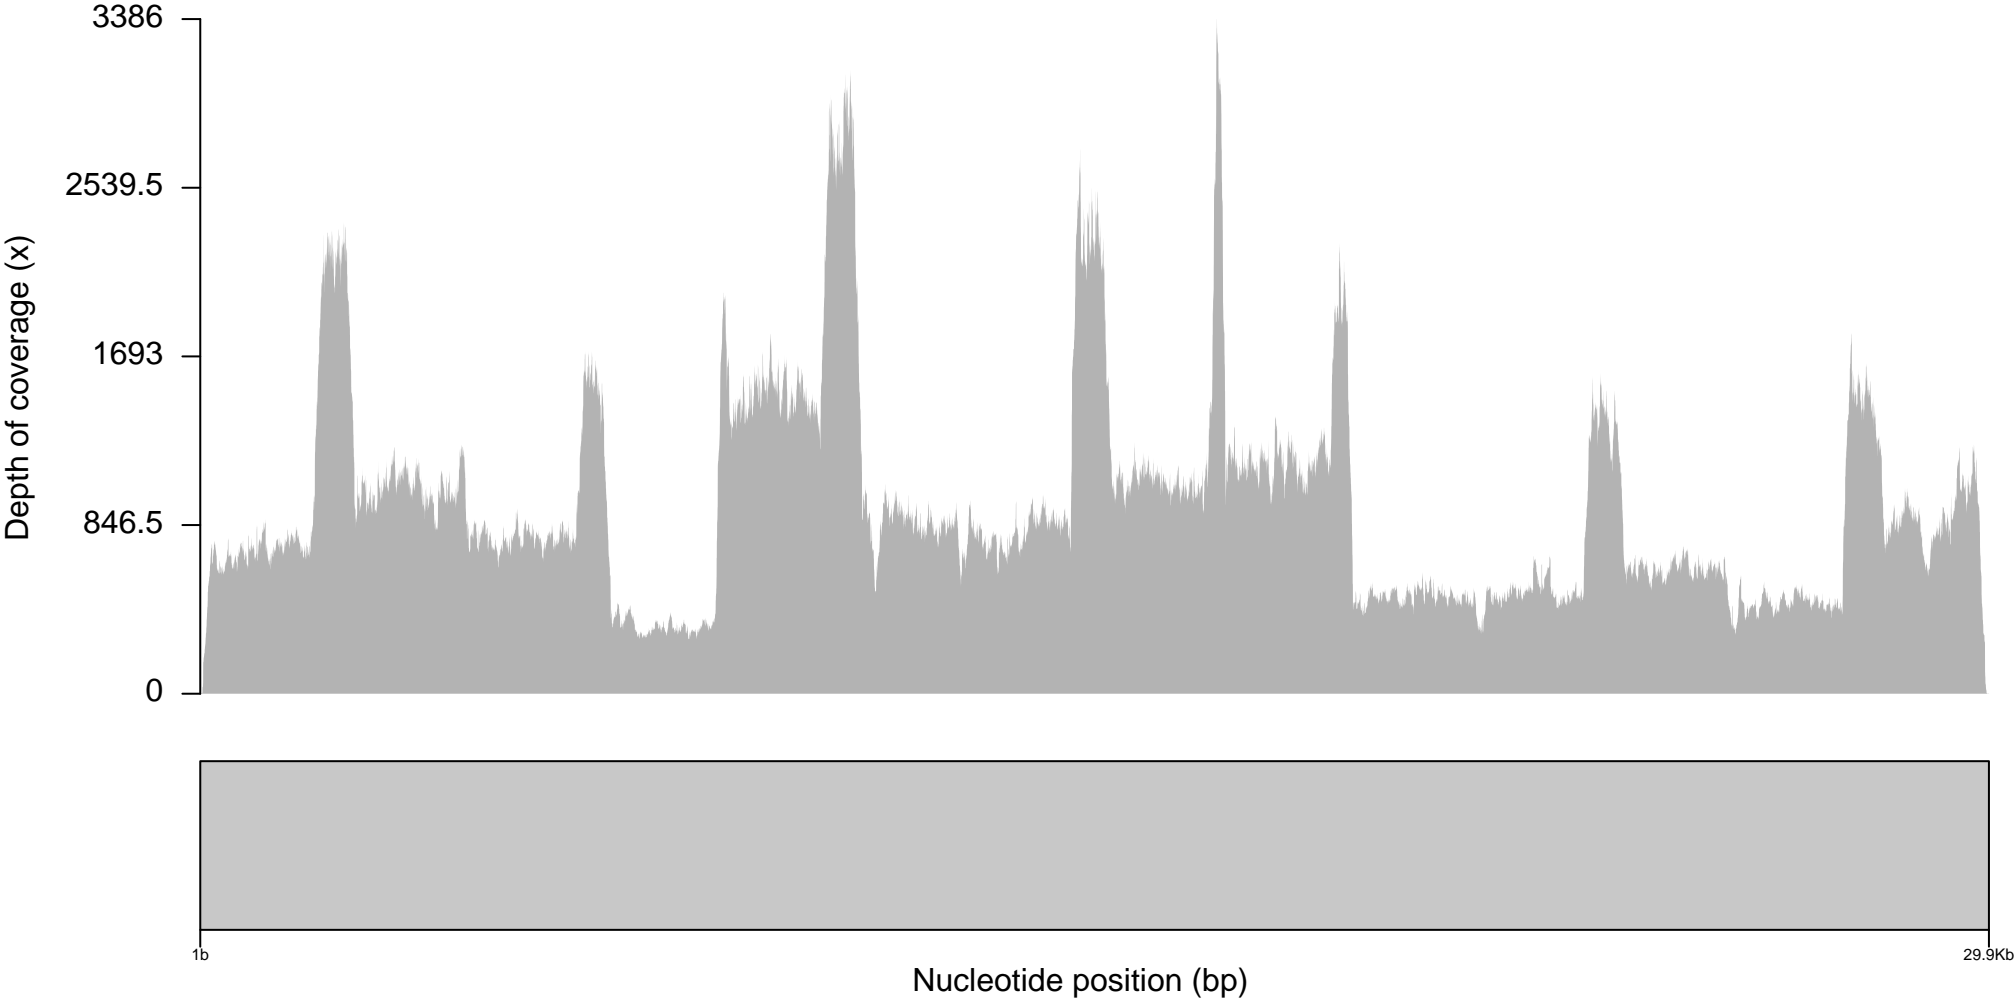

Sequencing depth of coverage for Sample: hCoV-19\_Brazil\_RS-HBM-39502\_2021

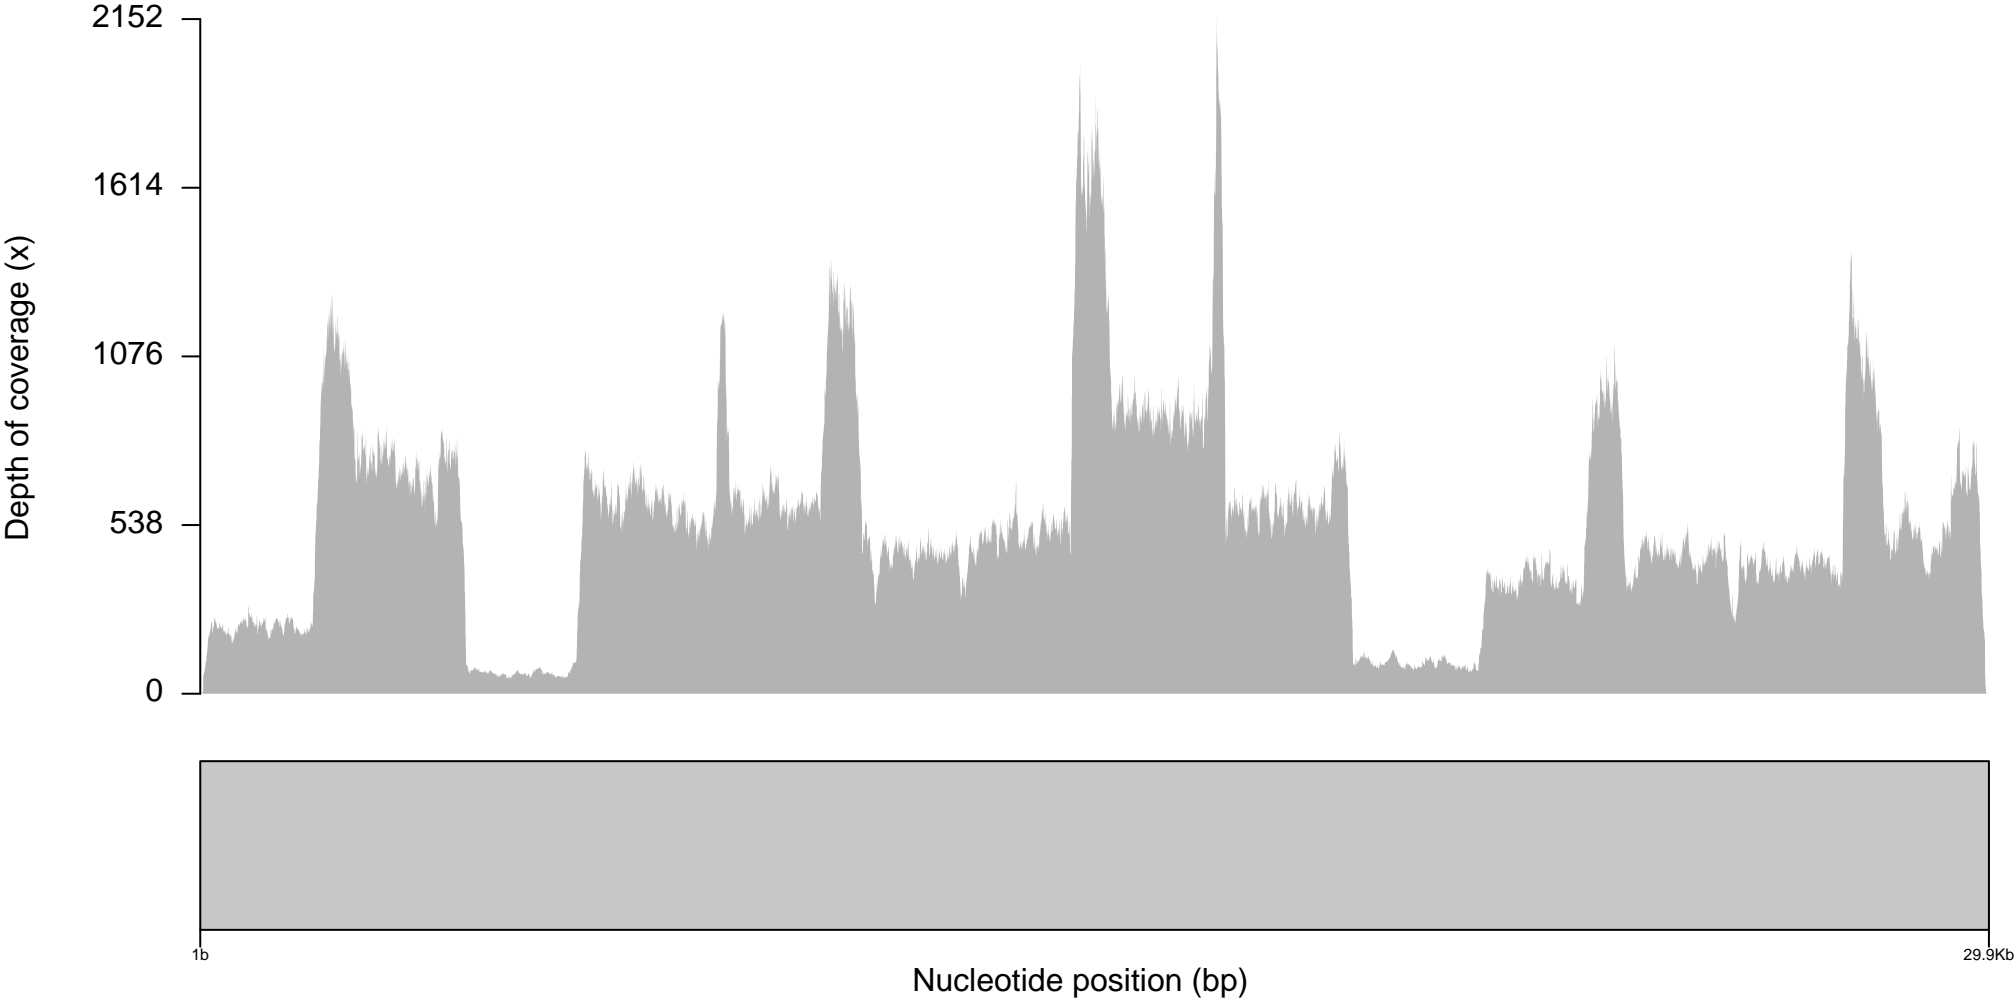

Sequencing depth of coverage for Sample: hCoV-19\_Brazil\_RS-HBM-39503\_2021

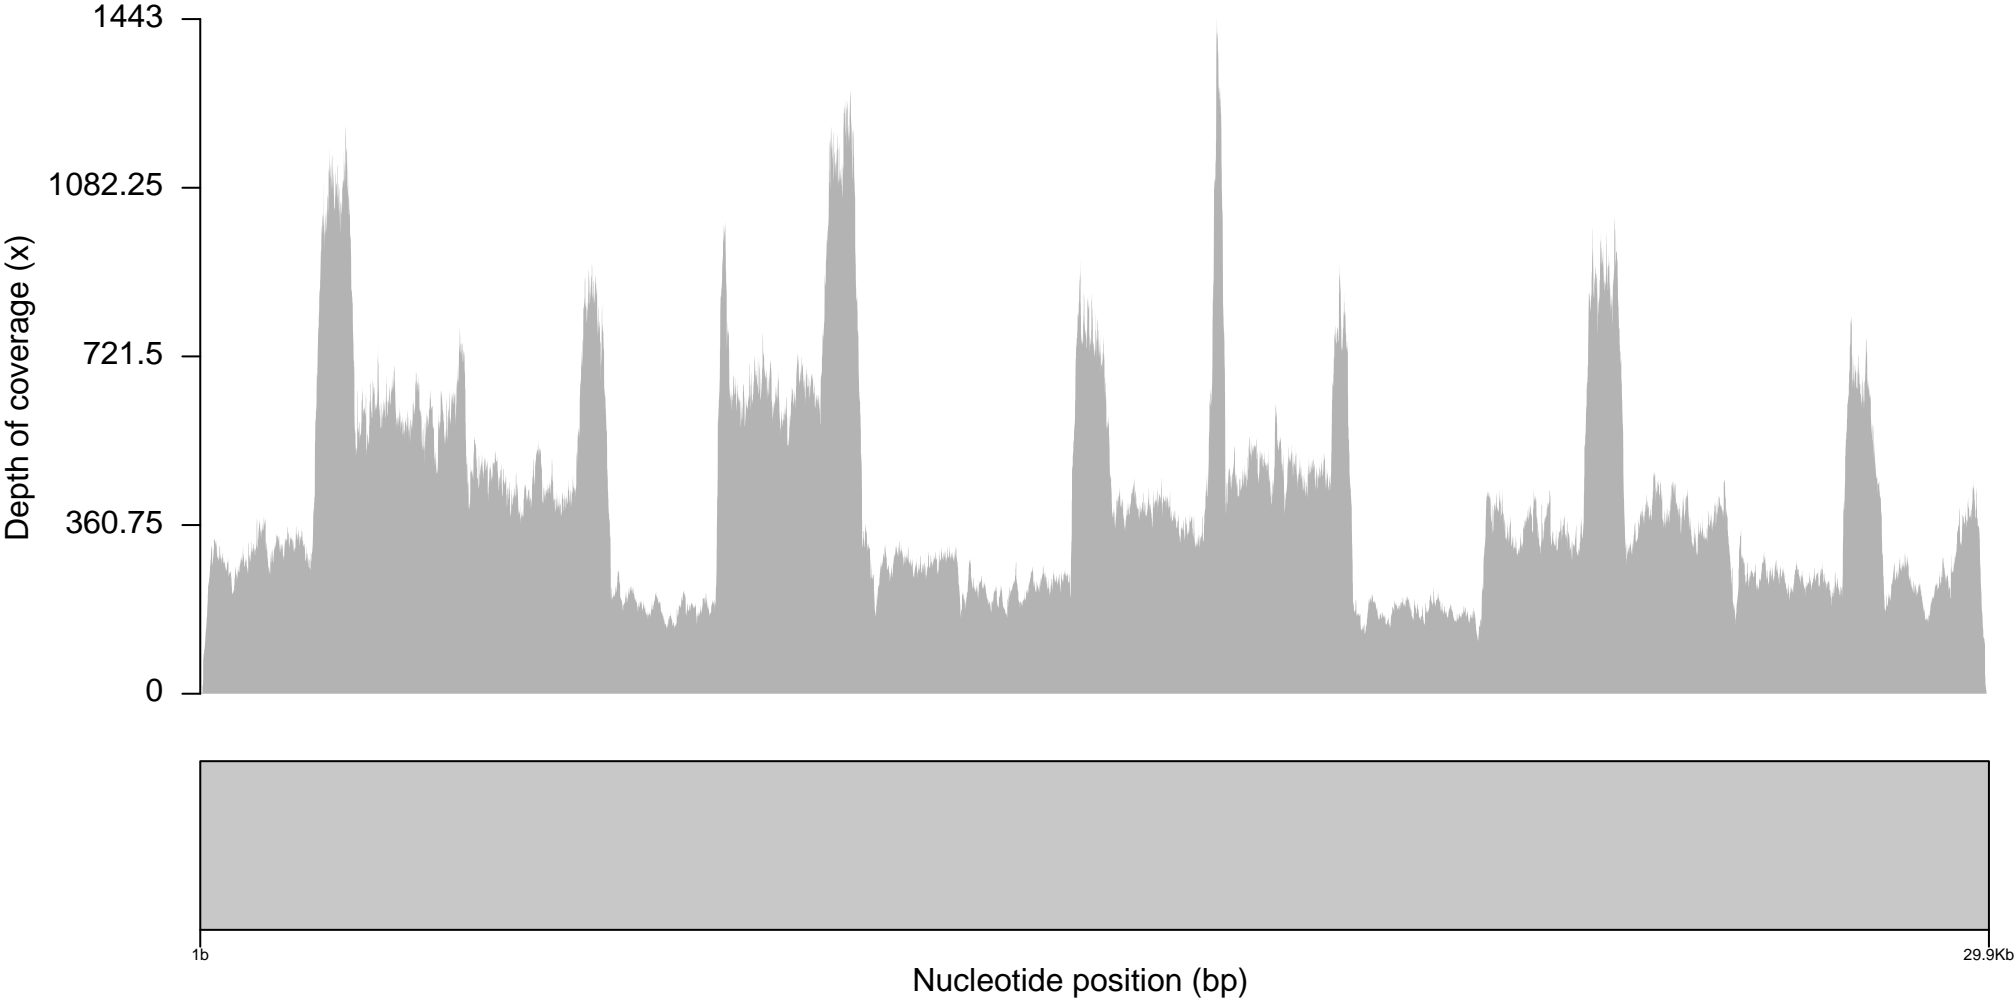

Sequencing depth of coverage for Sample: hCoV-19\_Brazil\_RS-HBM-39504\_2021

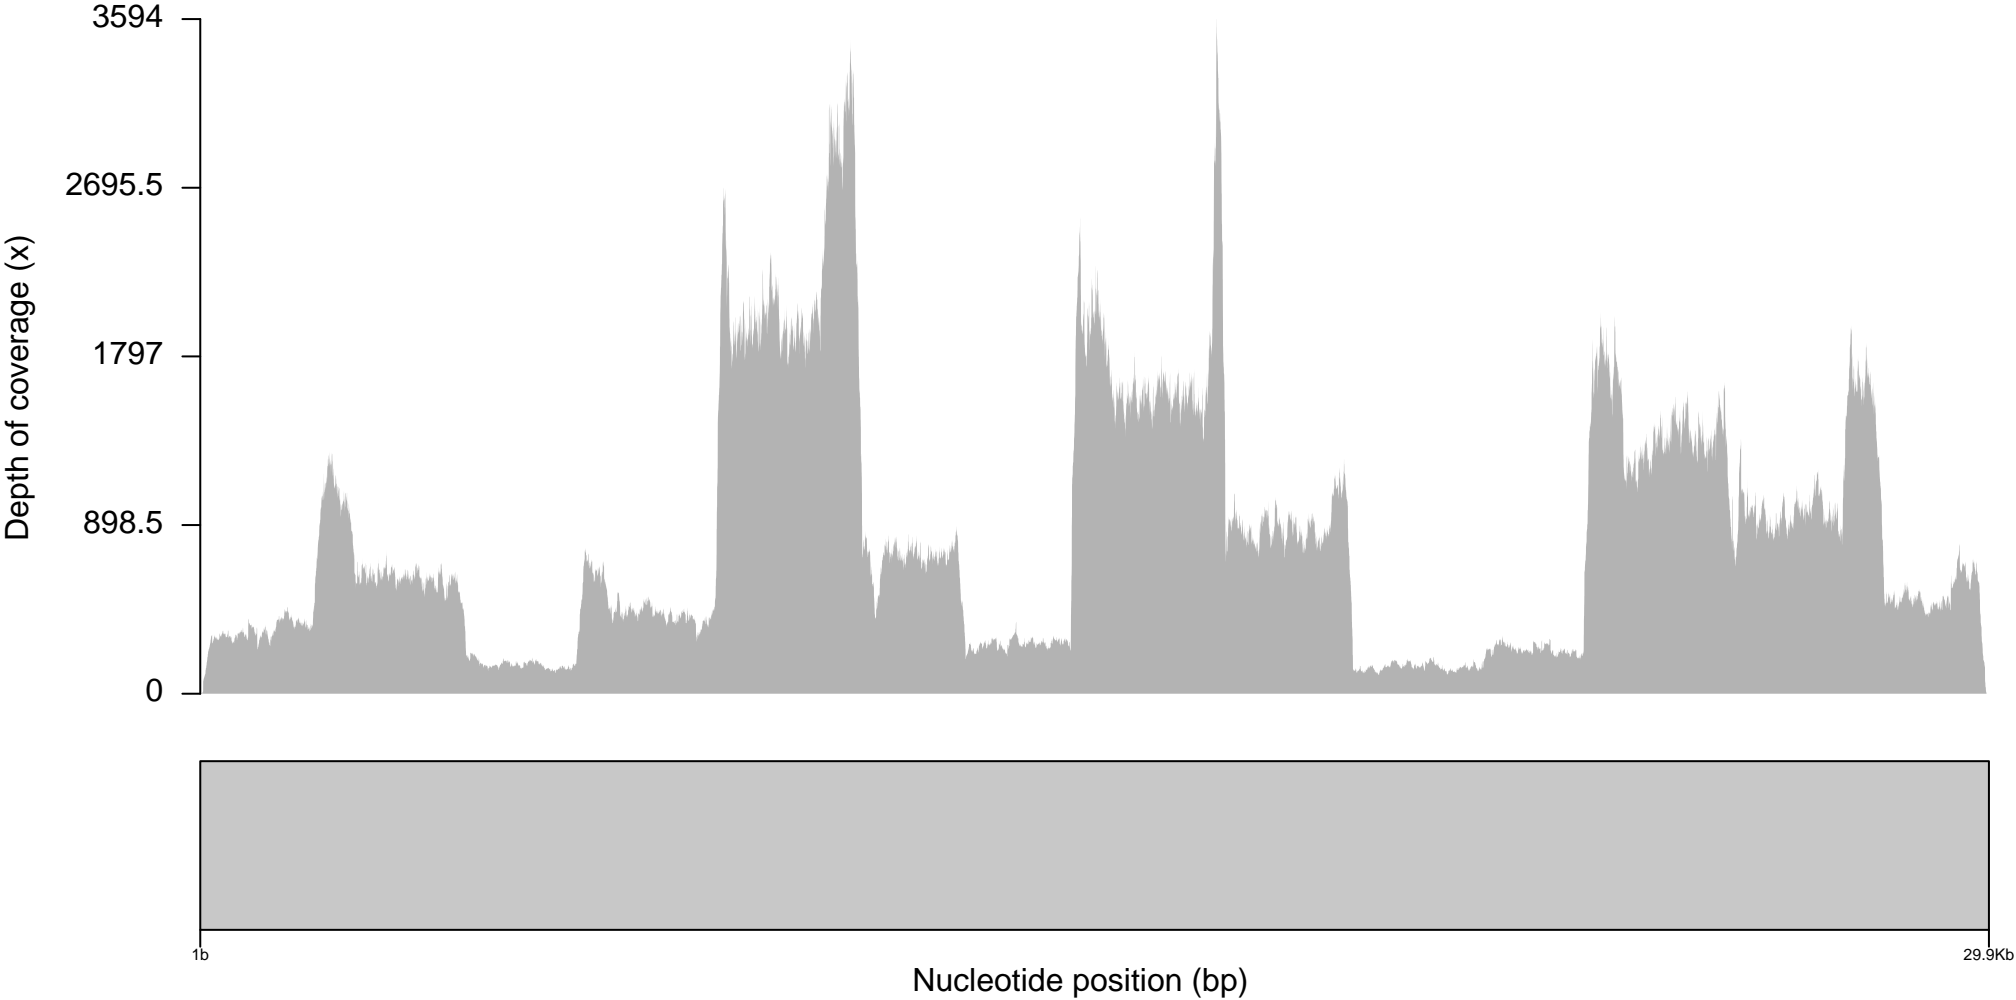

Sequencing depth of coverage for Sample: hCoV-19\_Brazil\_RS-HBM-39505\_2021

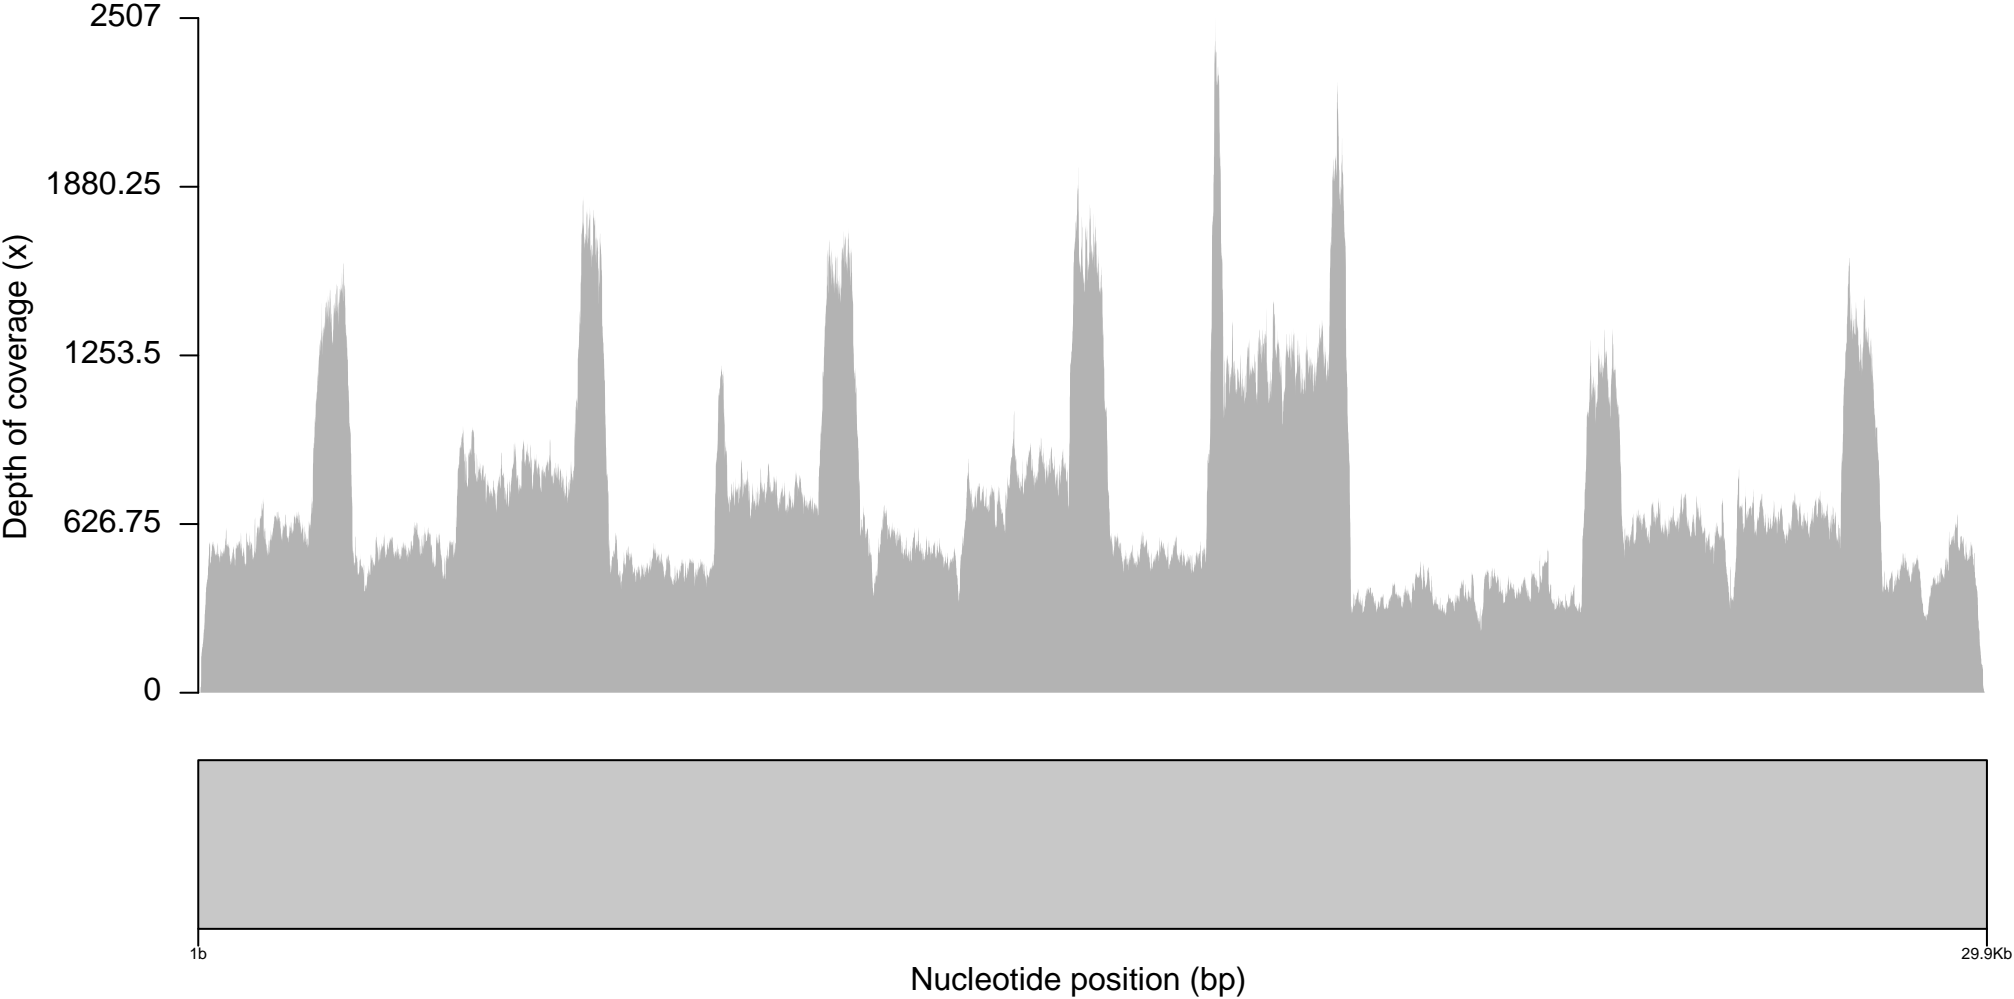

Sequencing depth of coverage for Sample: hCoV-19\_Brazil\_RS-HBM-39506\_2021

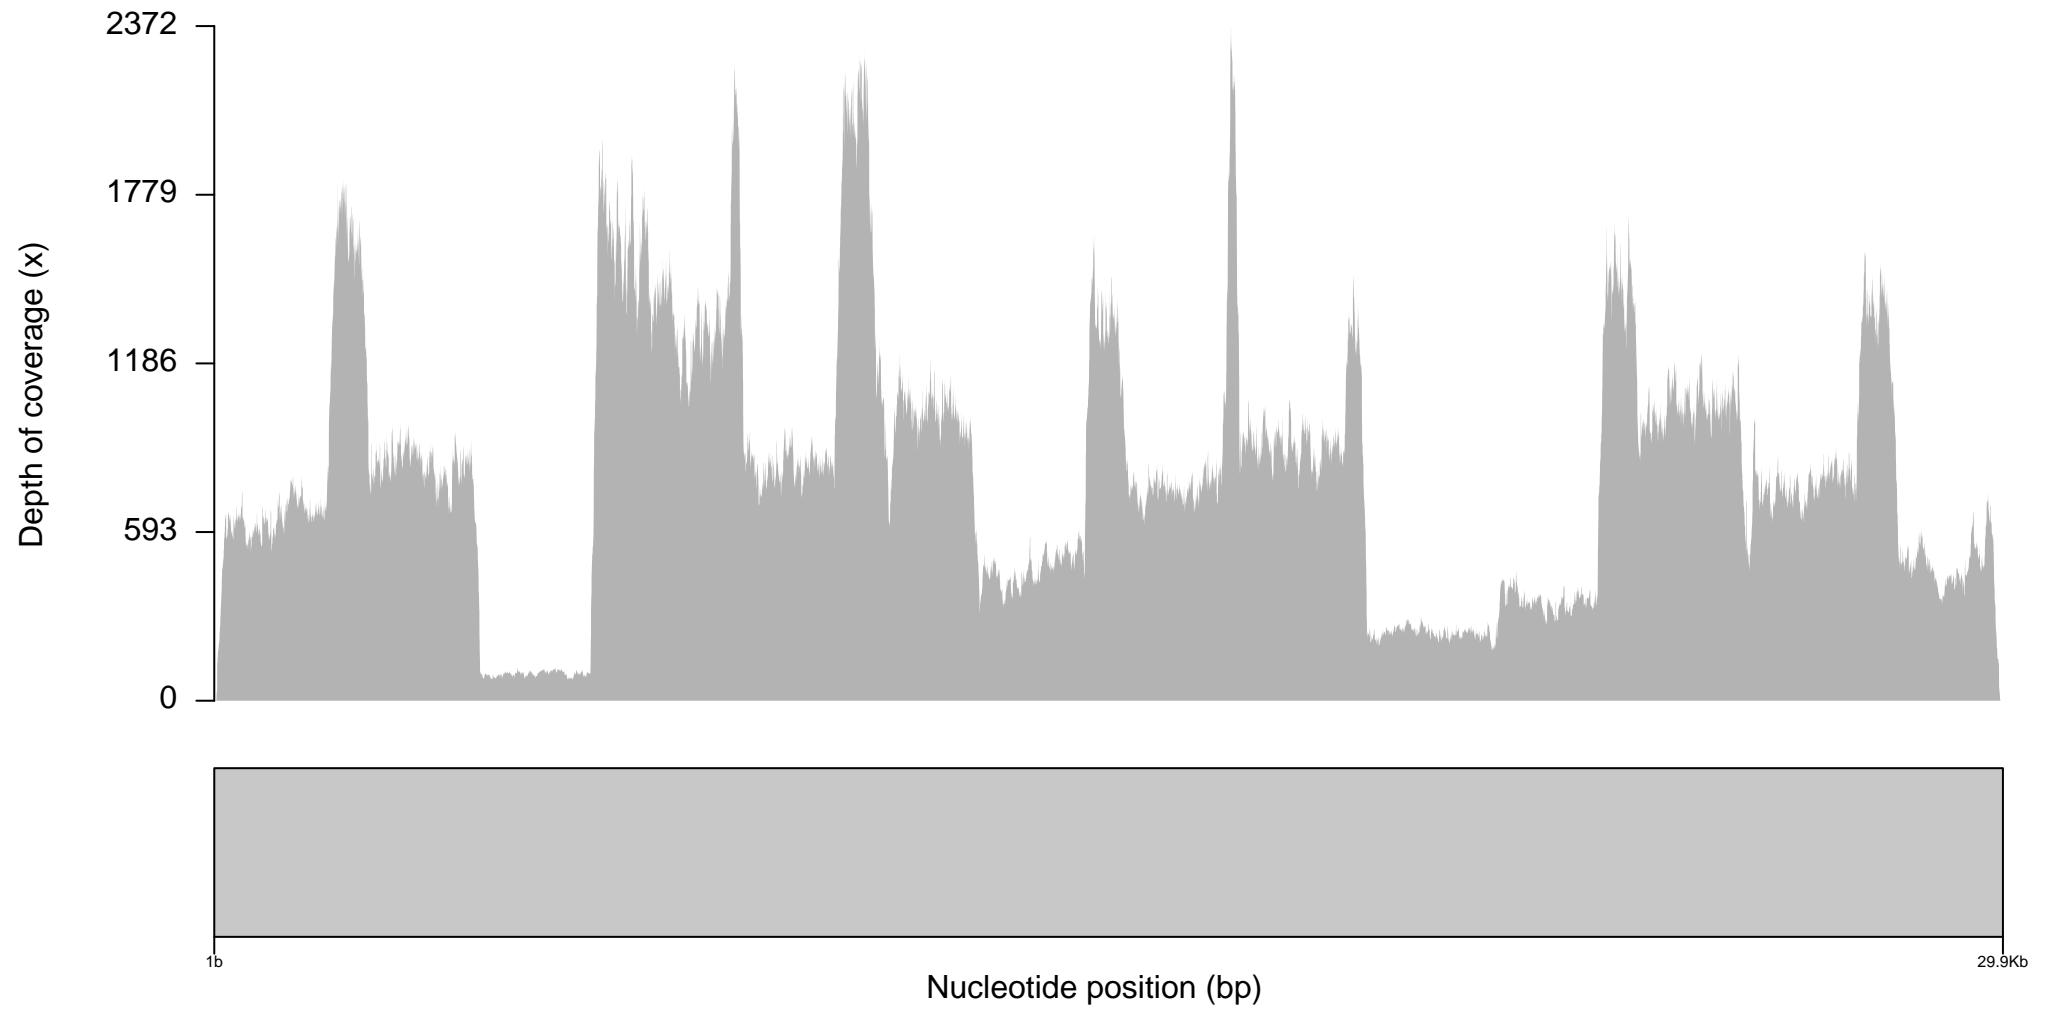

Sequencing depth of coverage for Sample: hCoV-19\_Brazil\_RS-HBM-39507\_2021

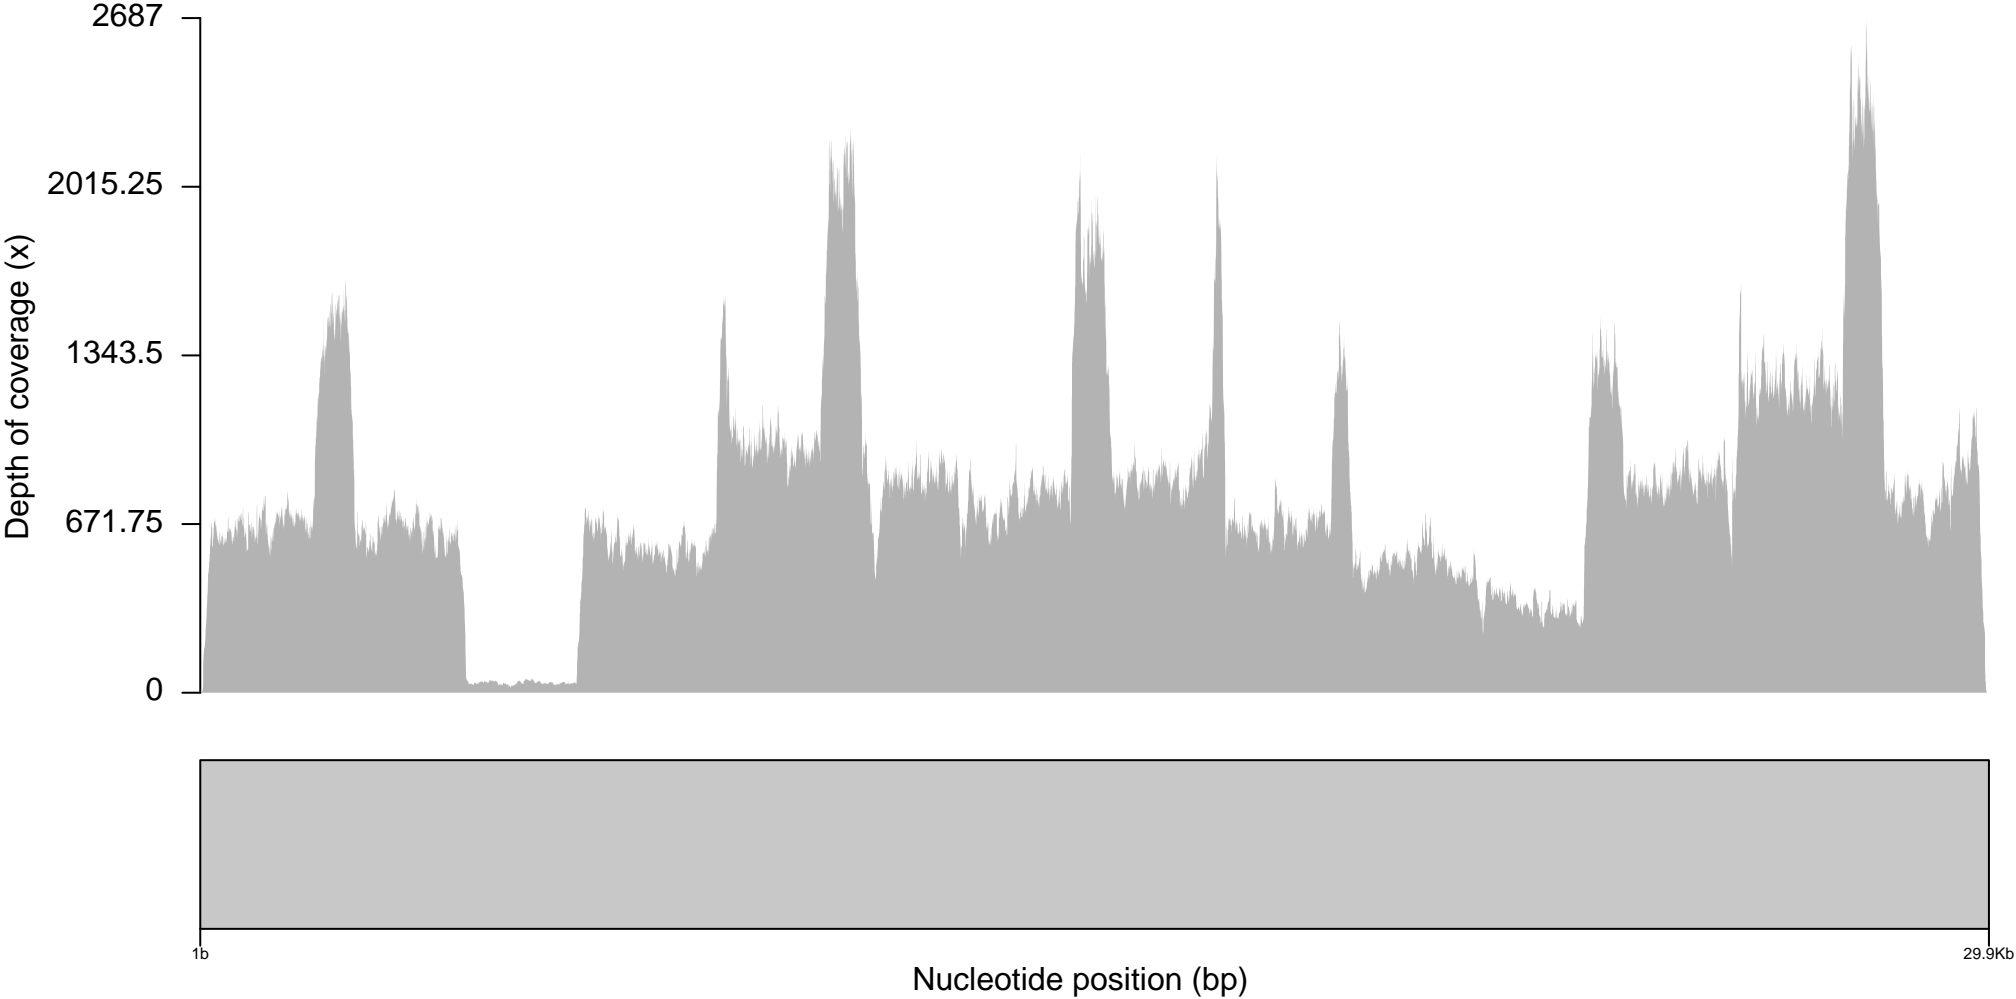

Sequencing depth of coverage for Sample: hCoV-19\_Brazil\_RS-HBM-39508\_2021

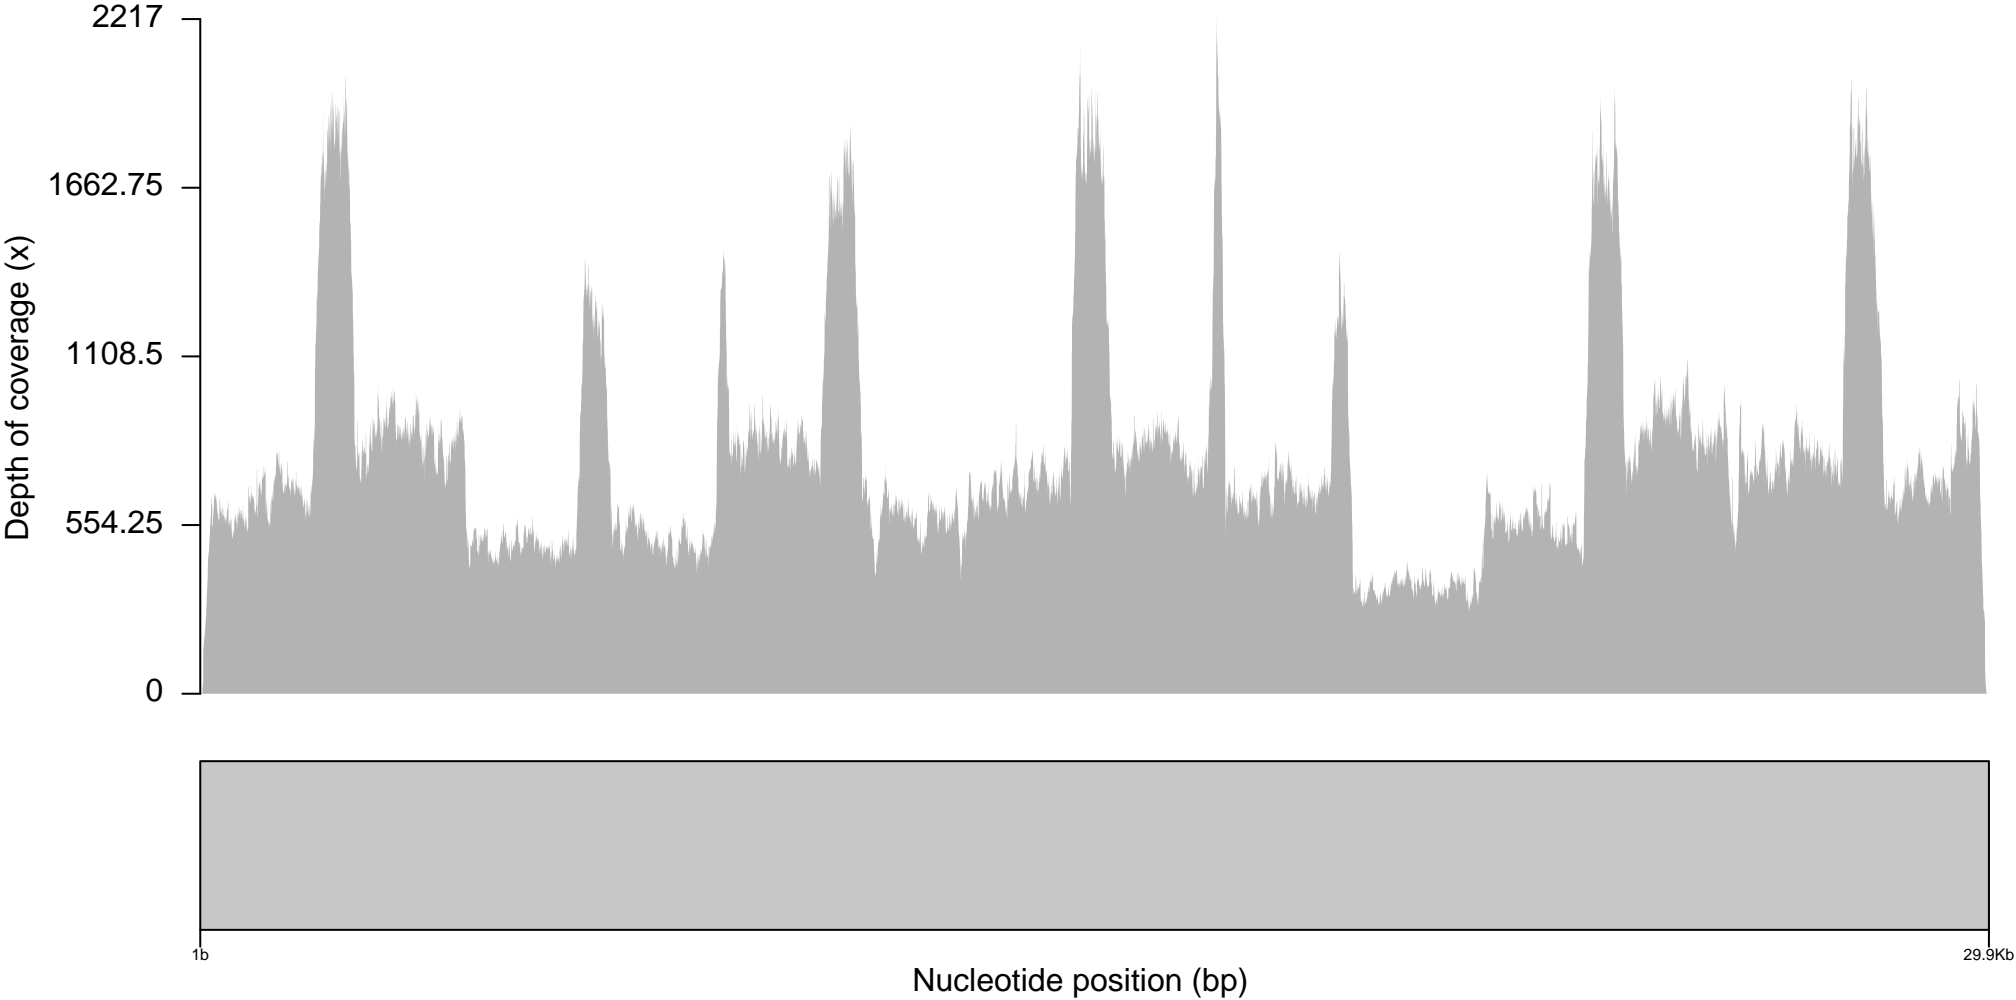

Sequencing depth of coverage for Sample: hCoV-19\_Brazil\_RS-HBM-39509\_2021

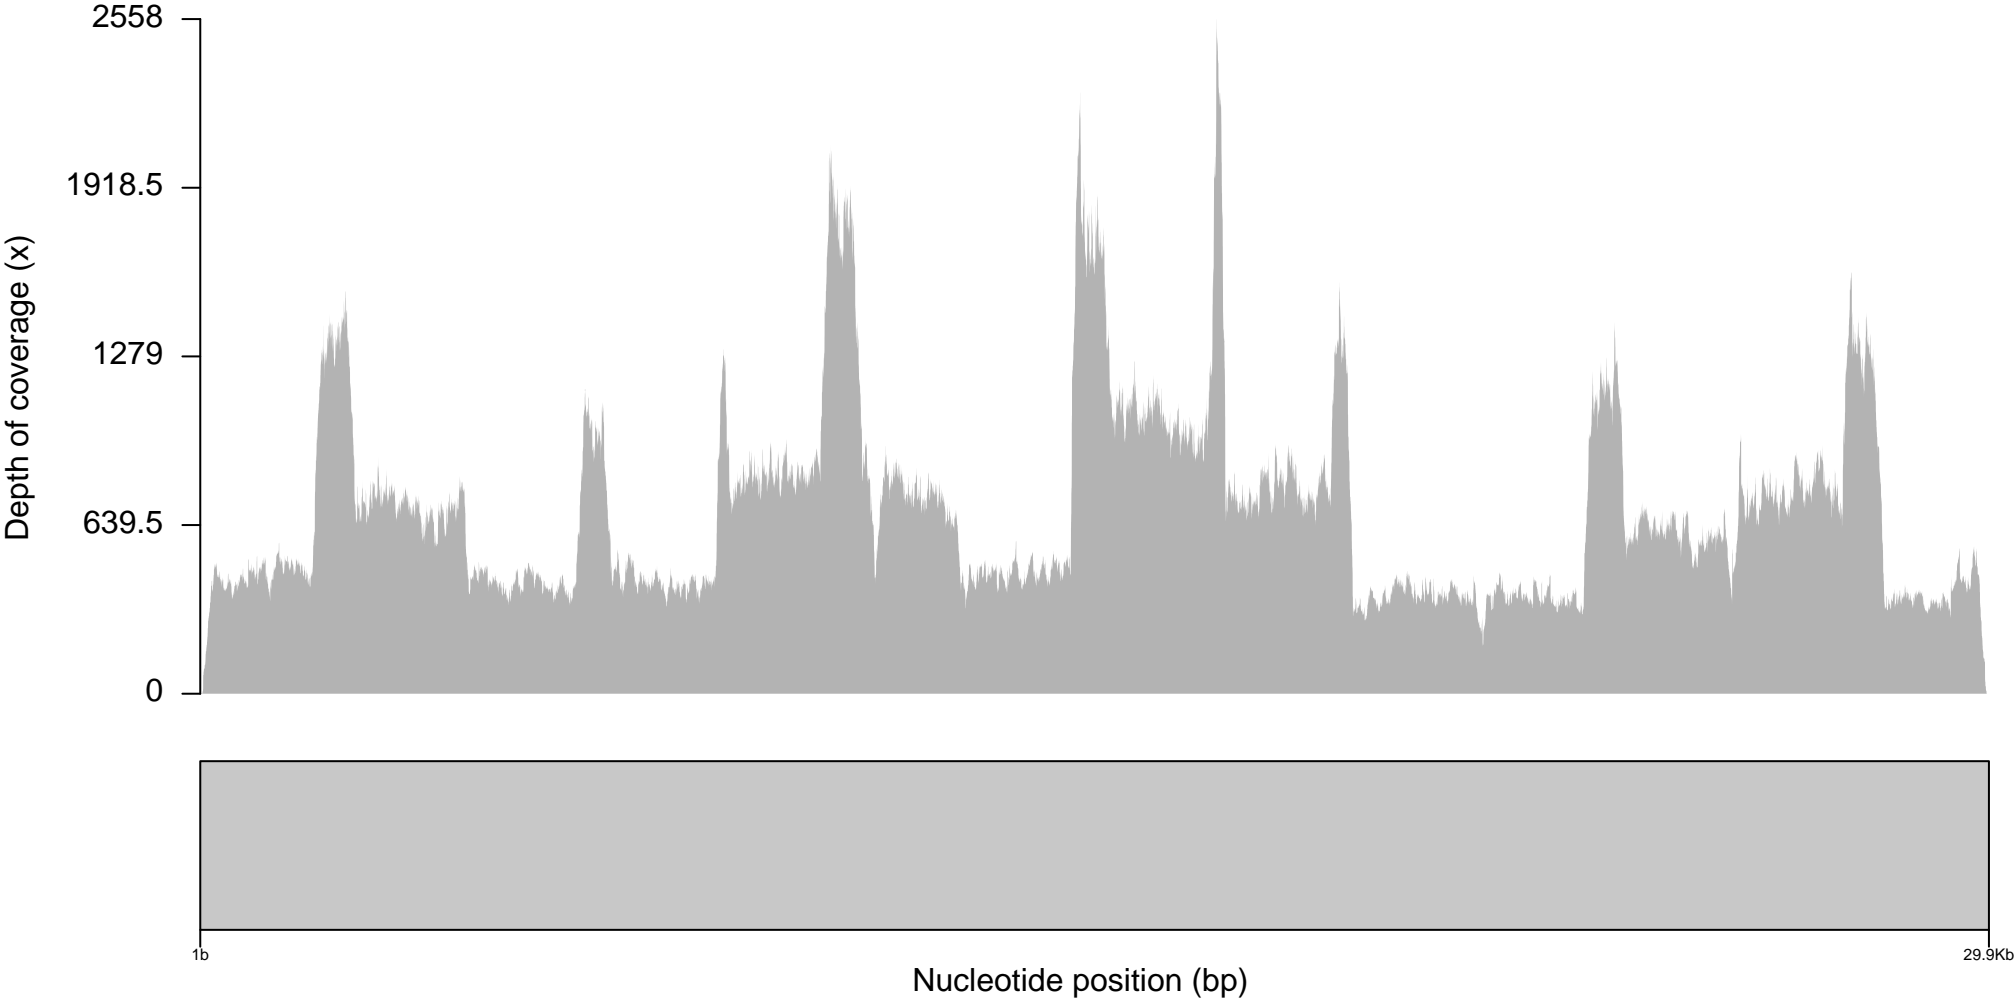

Sequencing depth of coverage for Sample: hCoV-19\_Brazil\_RS-HBM-39510\_2021

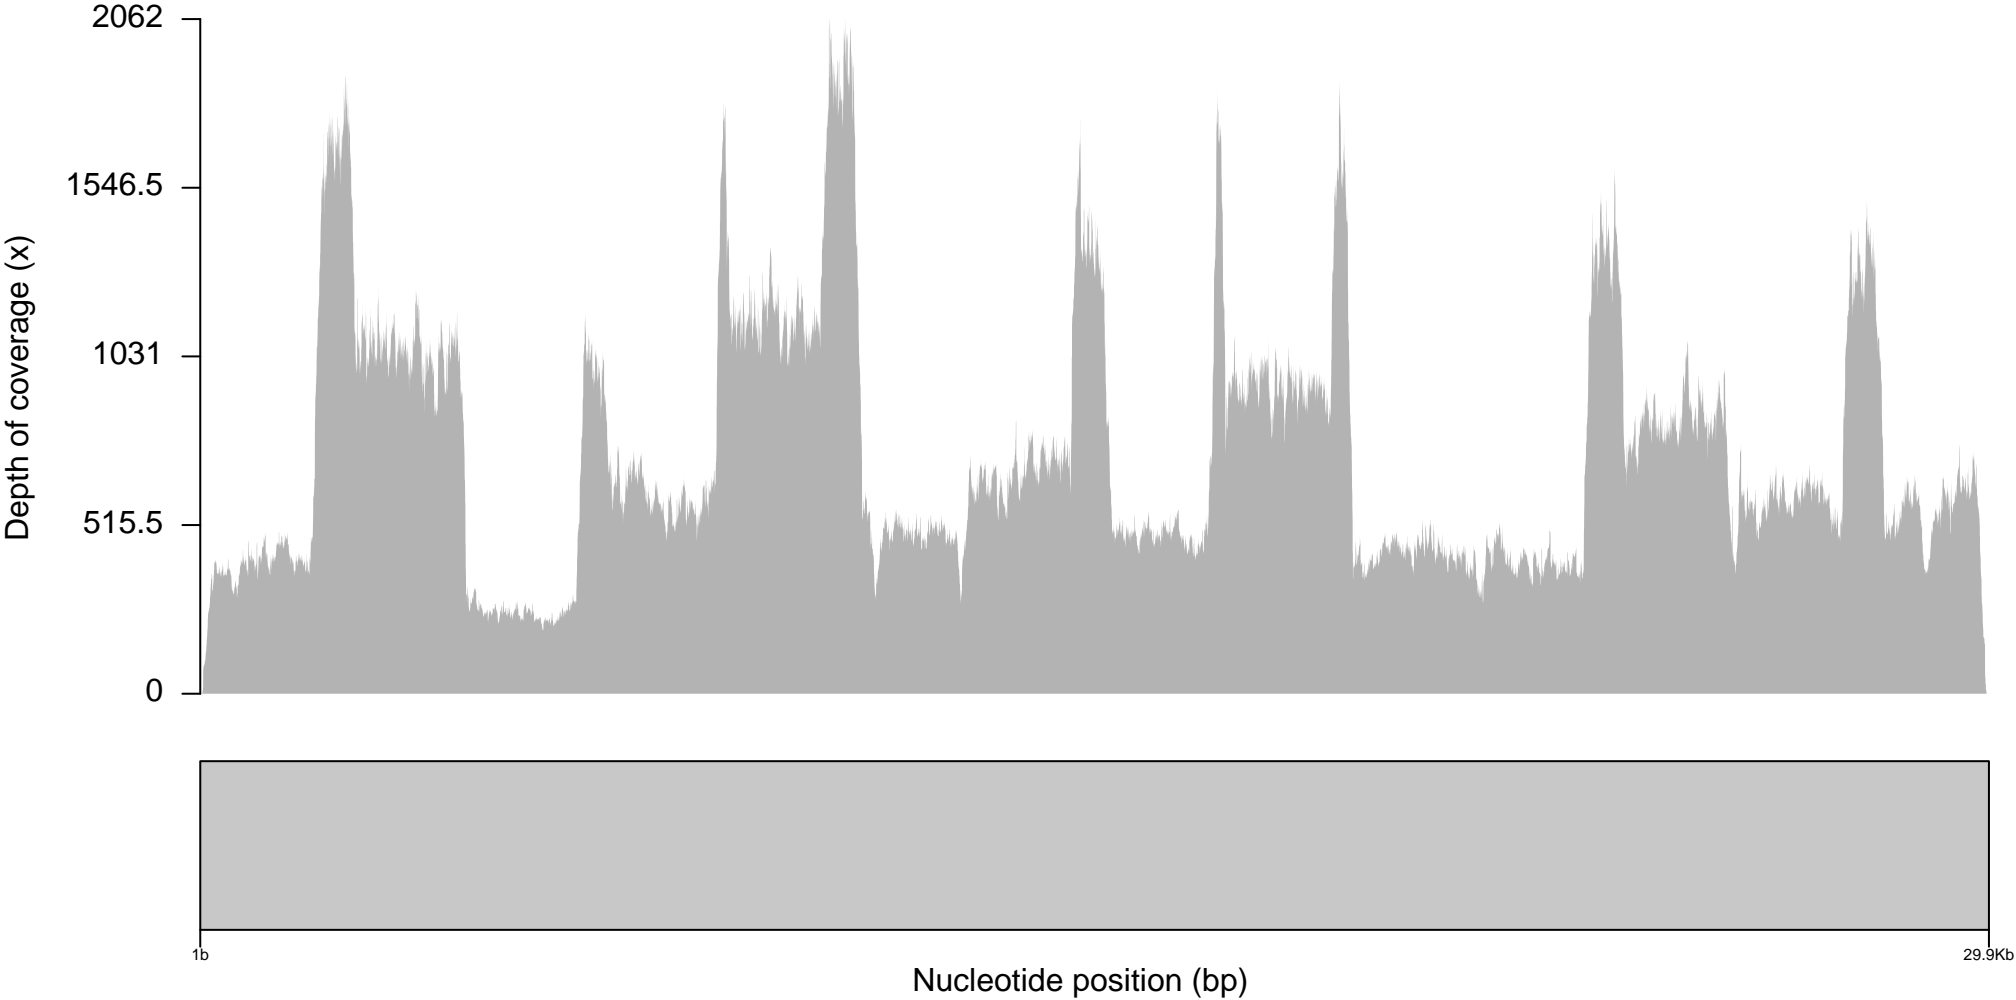

Sequencing depth of coverage for Sample: hCoV-19\_Brazil\_RS-HBM-39511\_2021

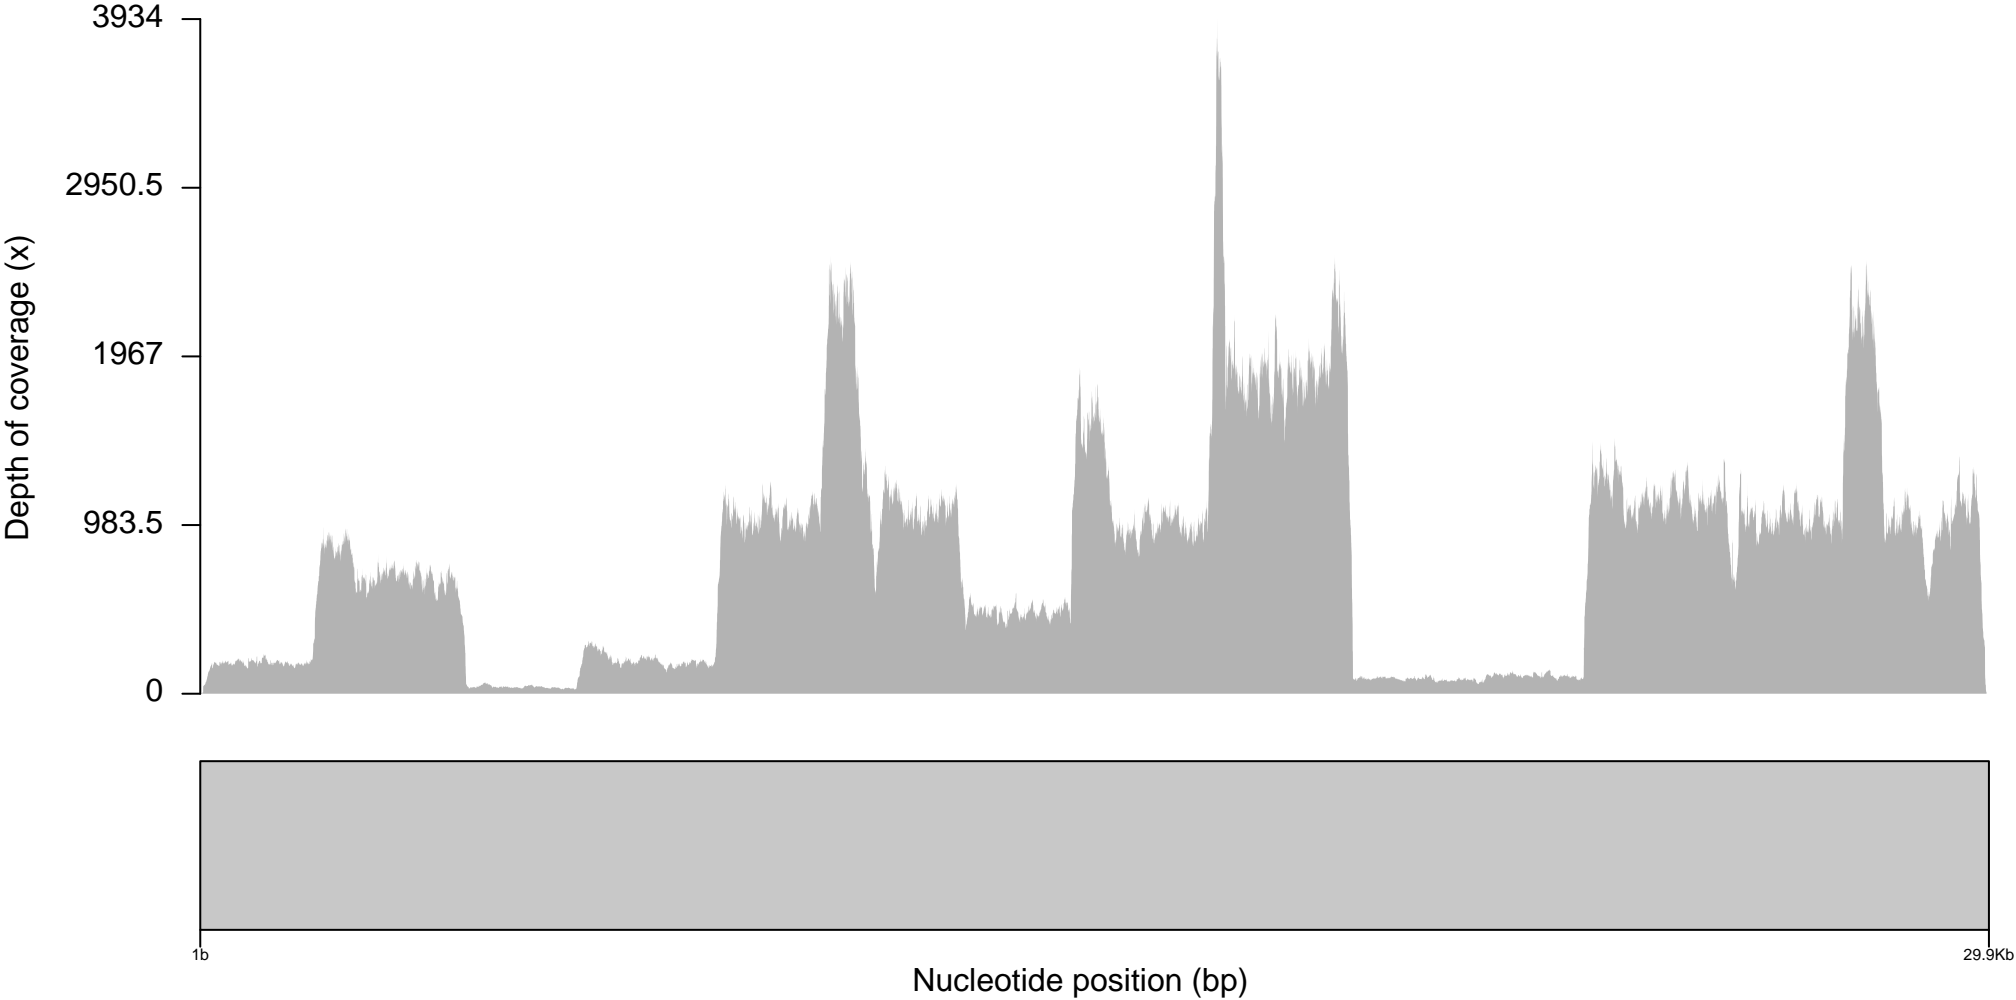

Sequencing depth of coverage for Sample: hCoV-19\_Brazil\_RS-HBM-39512\_2021

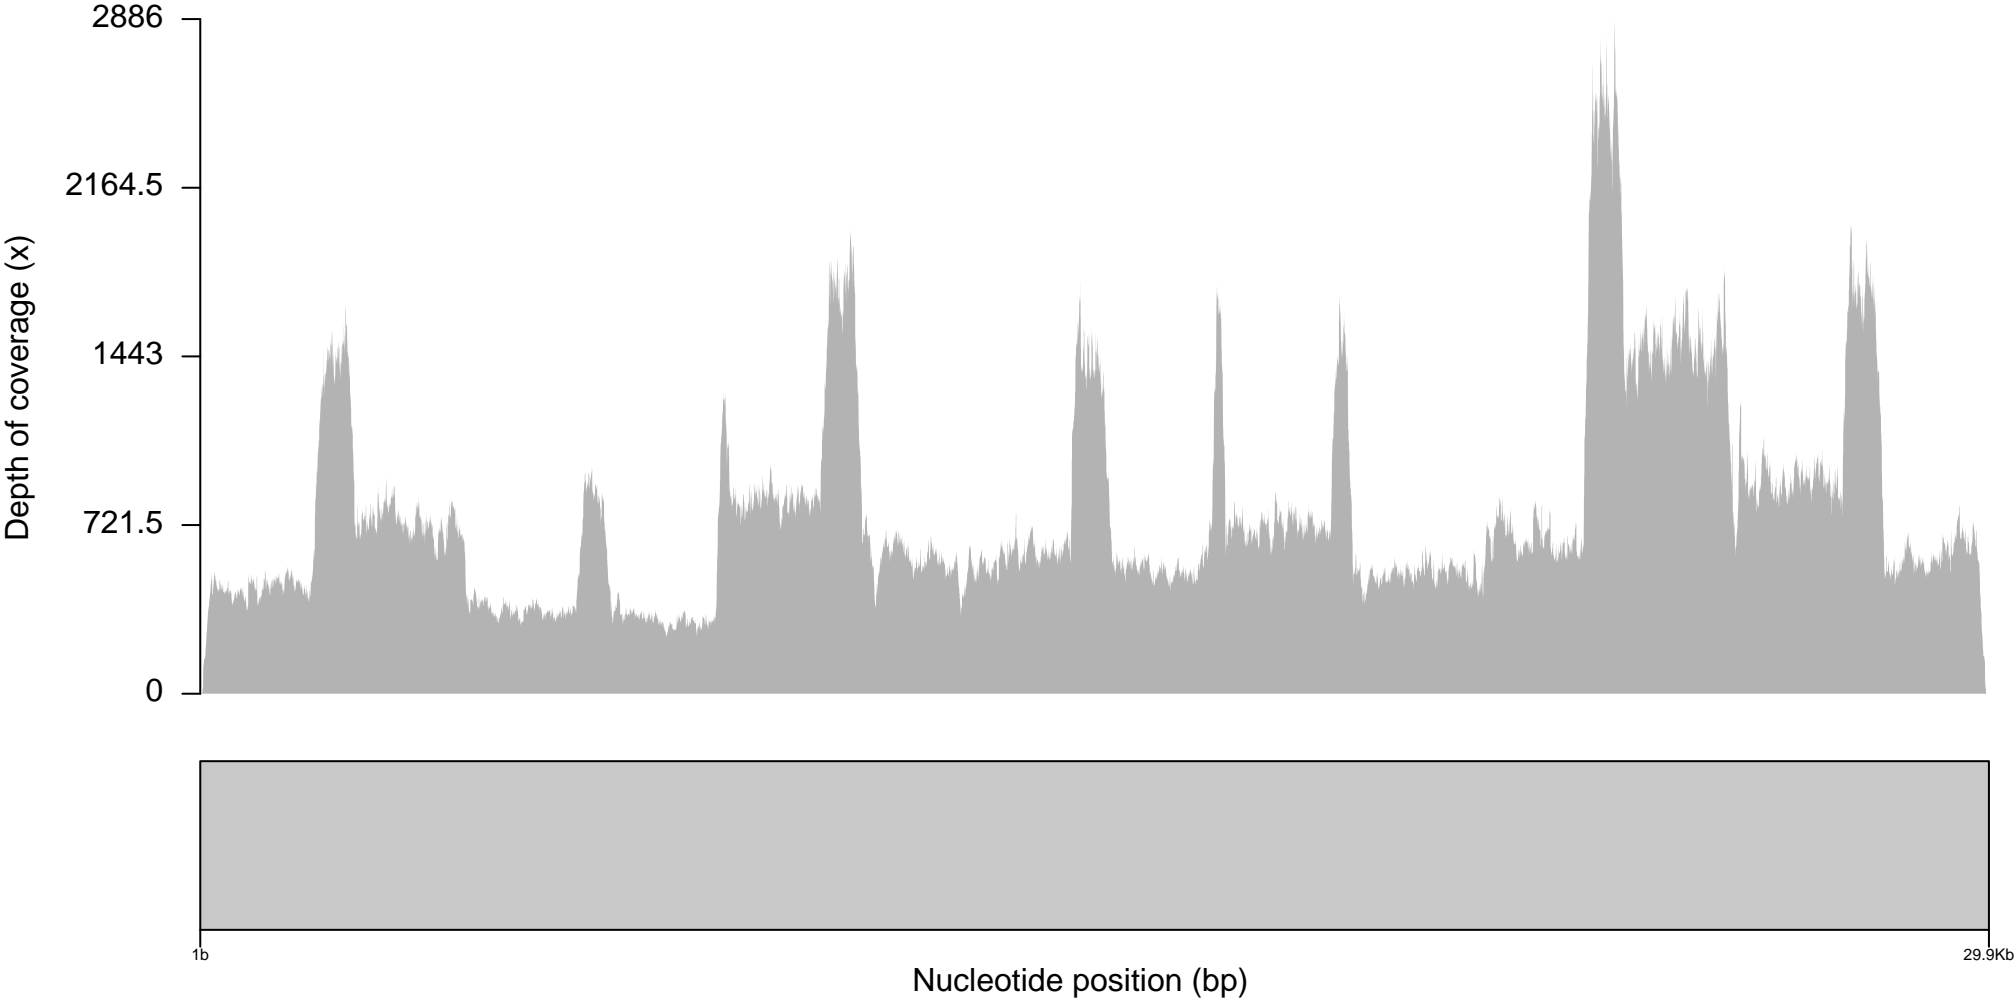

Sequencing depth of coverage for Sample: hCoV-19\_Brazil\_RS-HBM-39513\_2021

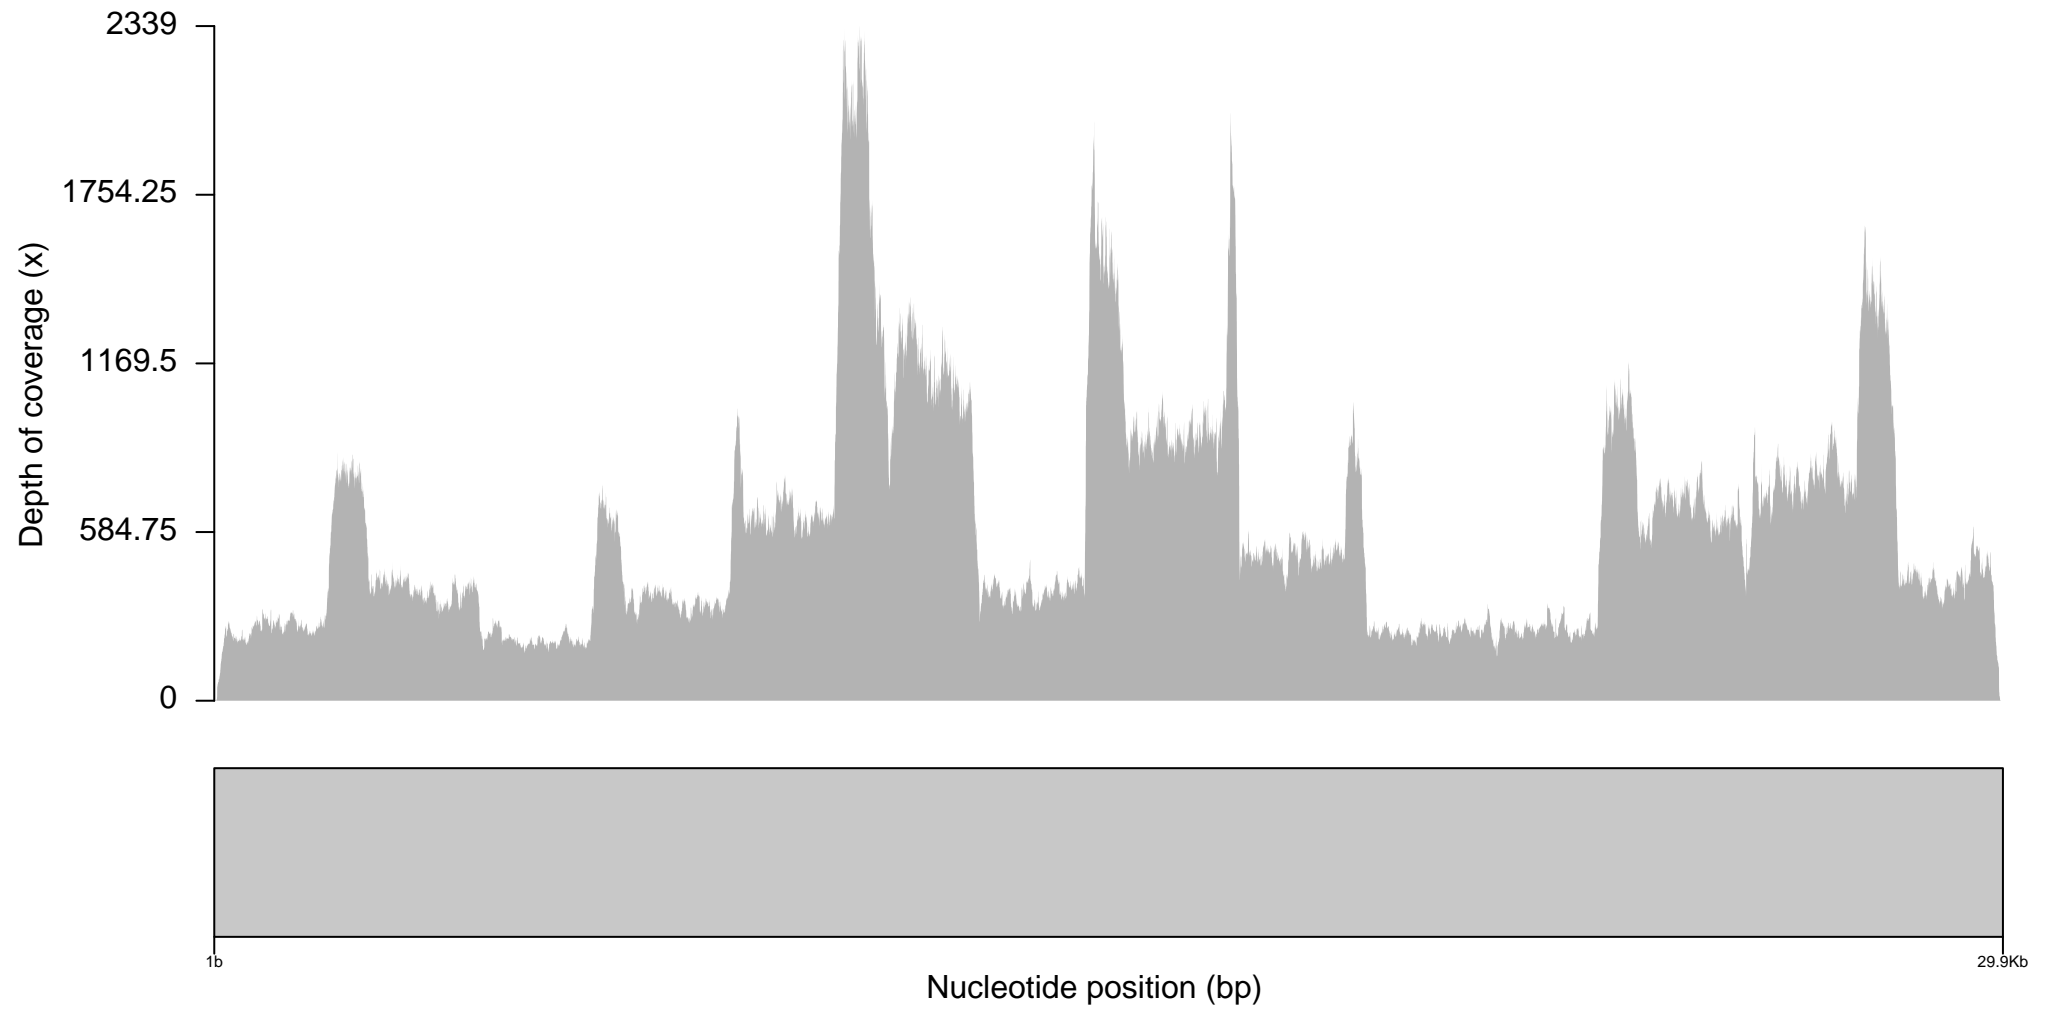

Sequencing depth of coverage for Sample: hCoV-19\_Brazil\_RS-HBM-39514\_2021

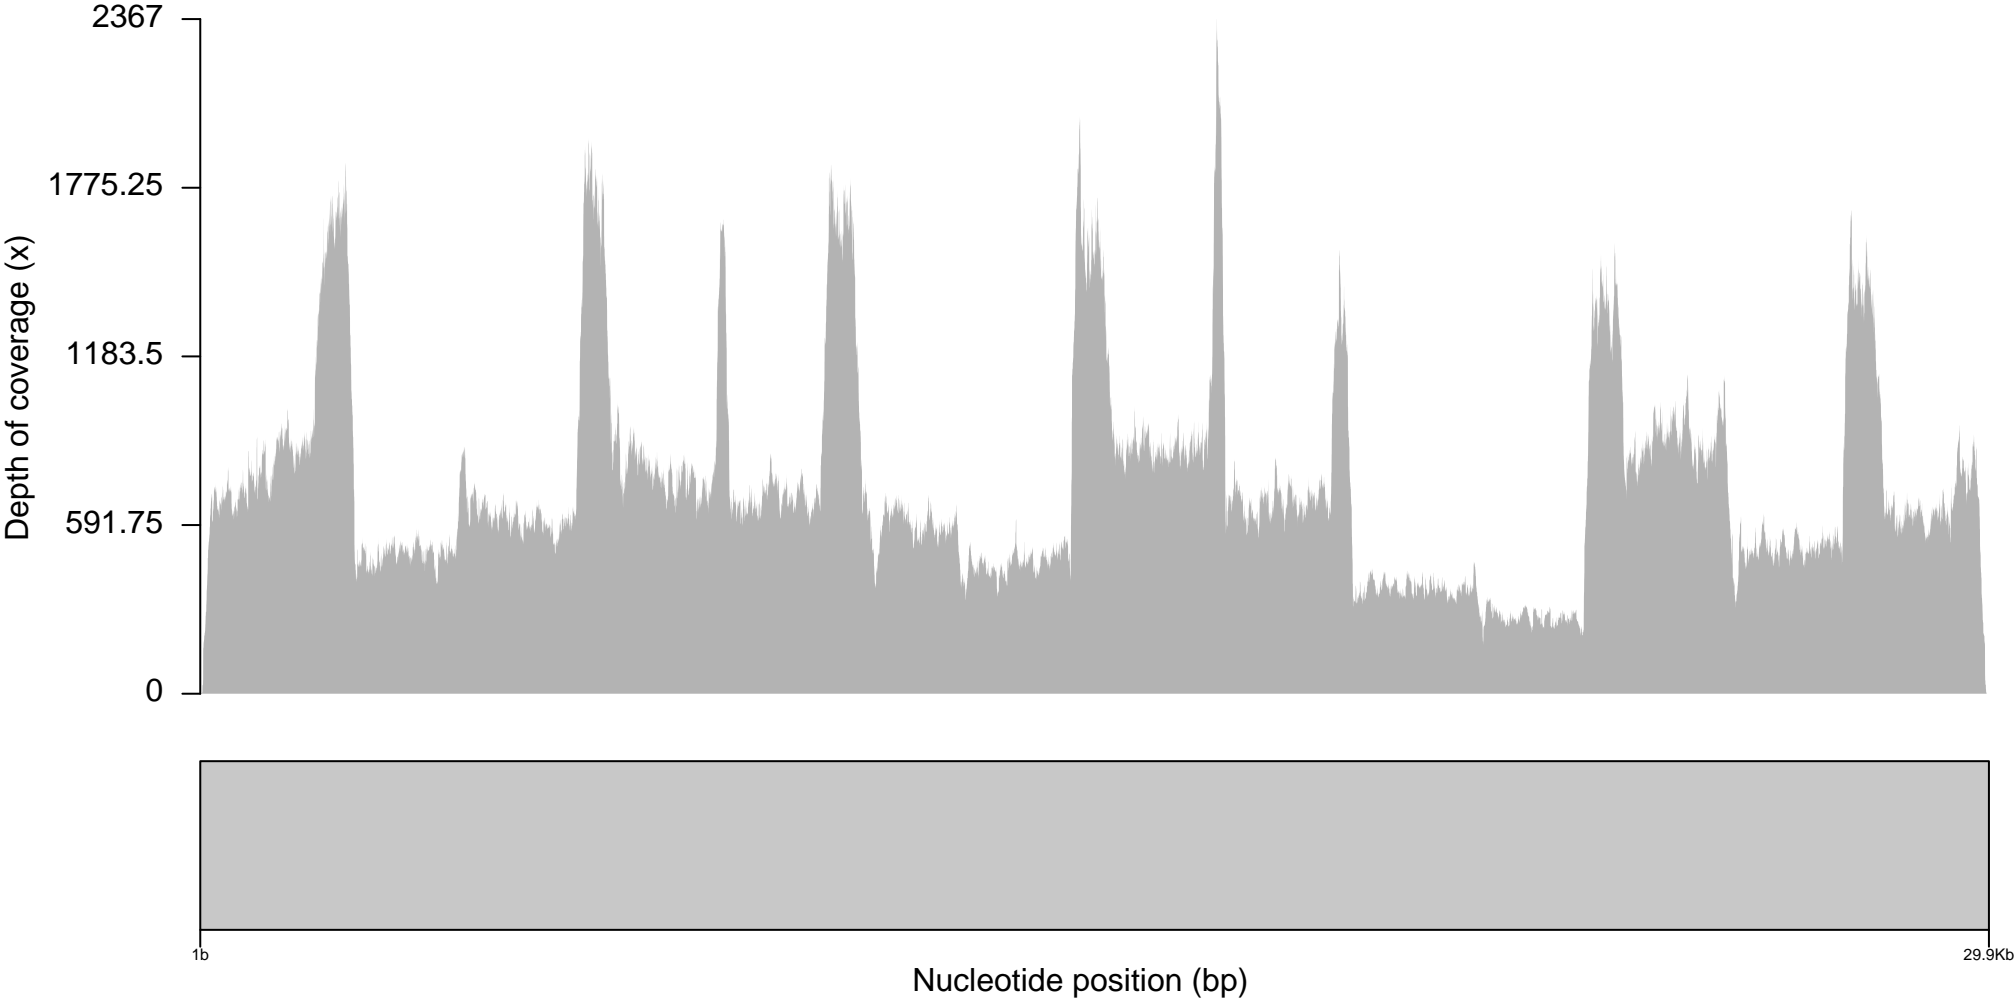

Sequencing depth of coverage for Sample: hCoV-19\_Brazil\_RS-HBM-39515\_2021

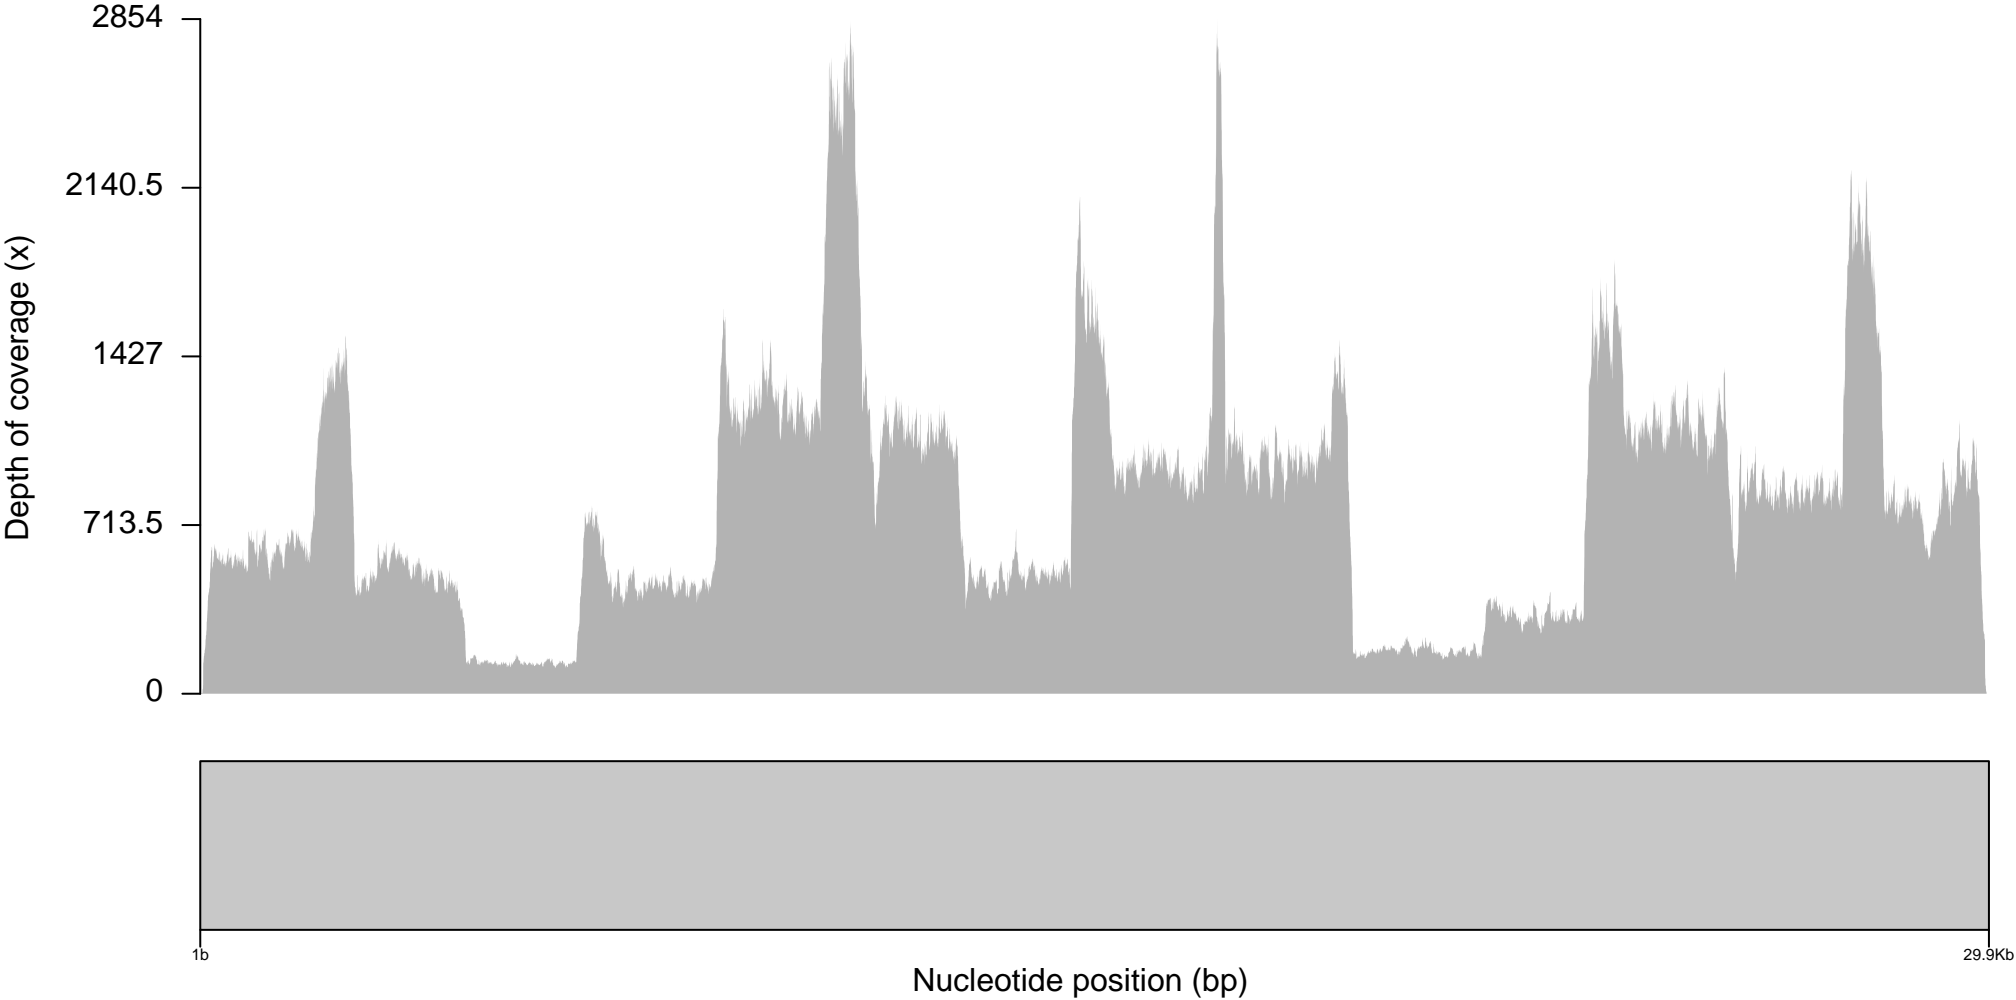

Sequencing depth of coverage for Sample: hCoV-19\_Brazil\_RS-HBM-39516\_2021

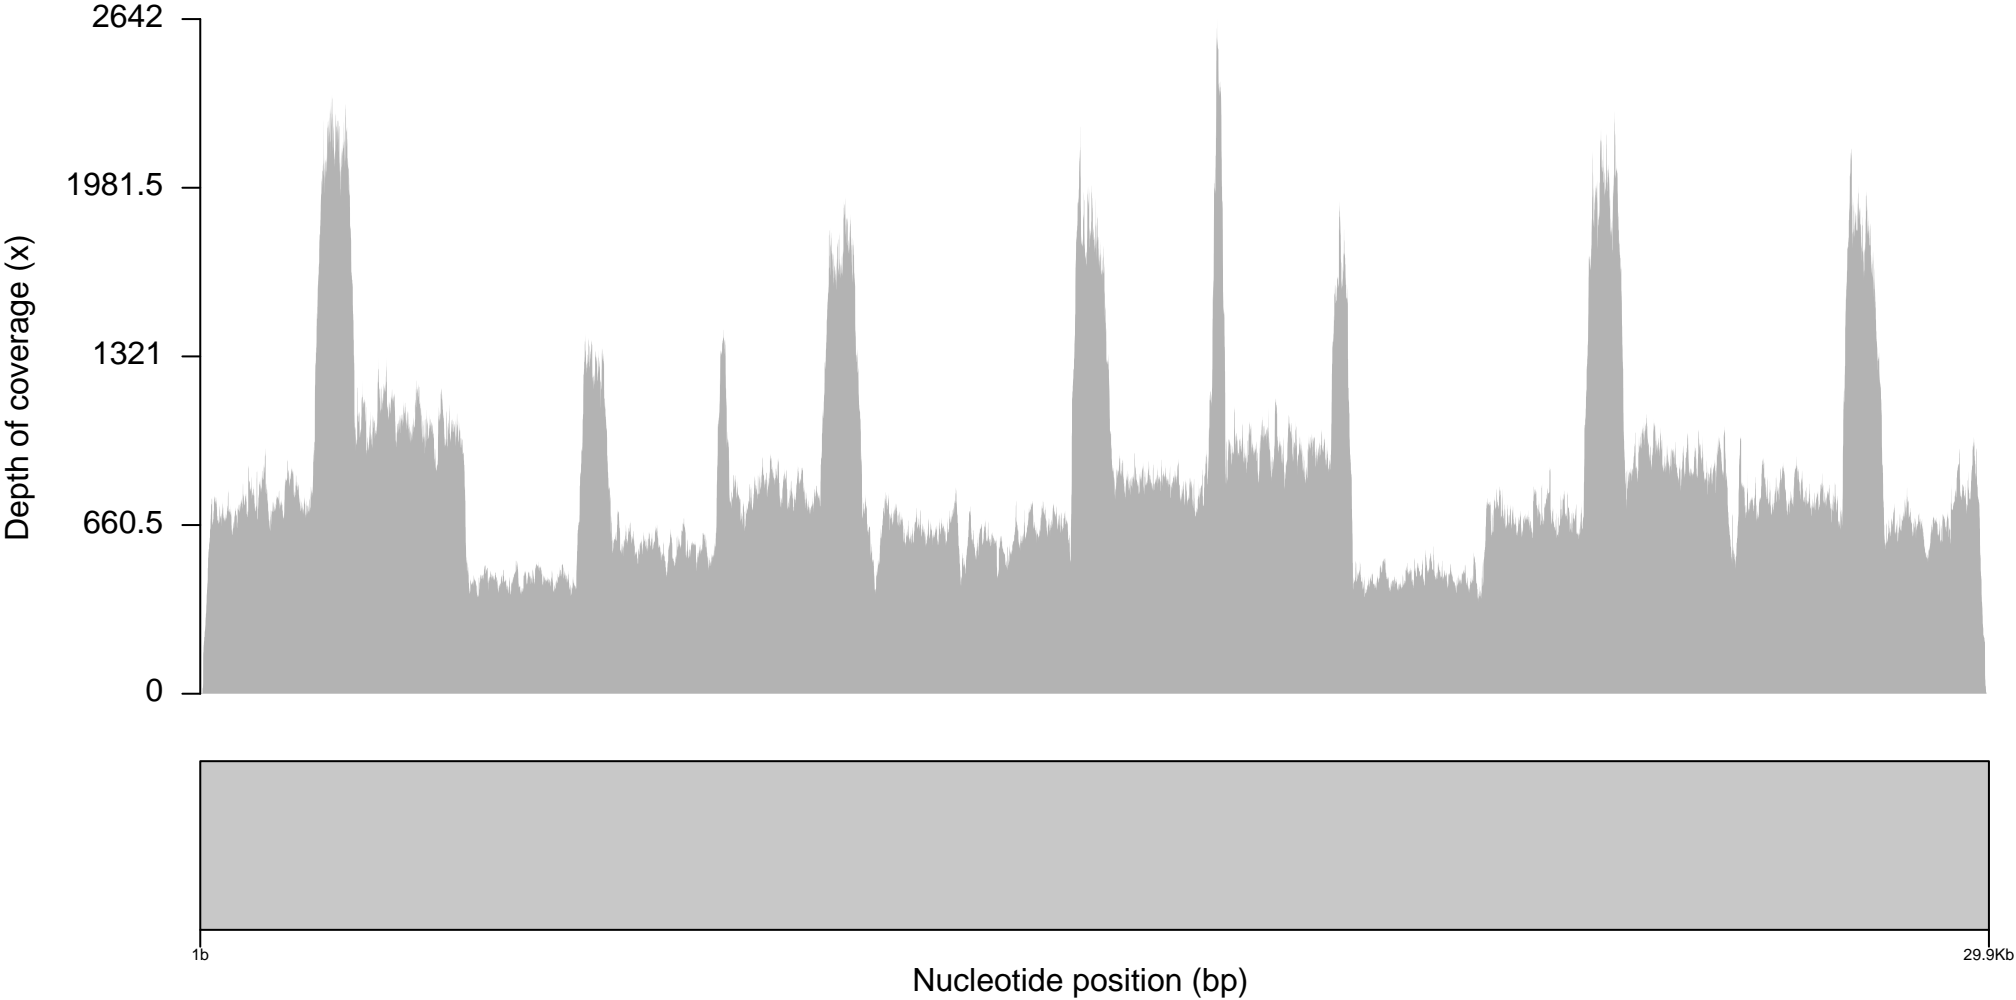

Sequencing depth of coverage for Sample: hCoV-19\_Brazil\_RS-HBM-39517\_2021

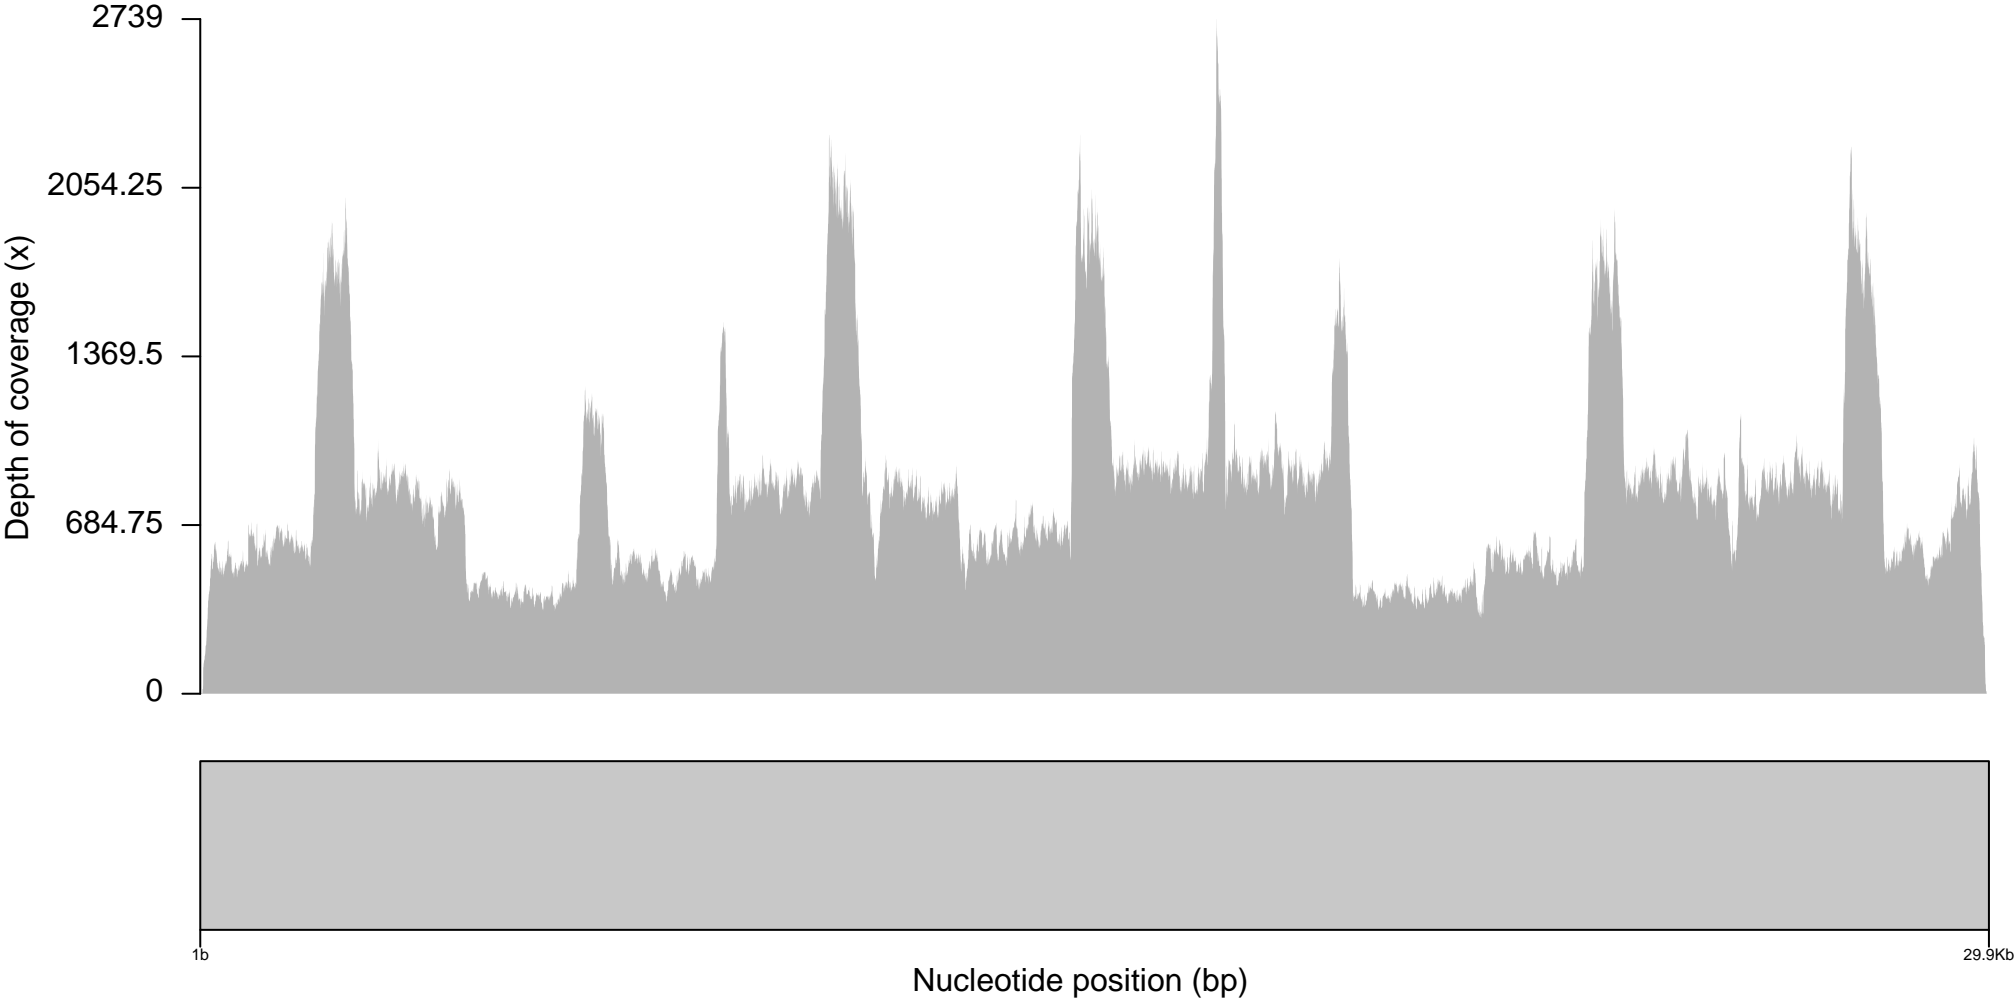

Sequencing depth of coverage for Sample: hCoV-19\_Brazil\_RS-HBM-39518\_2021

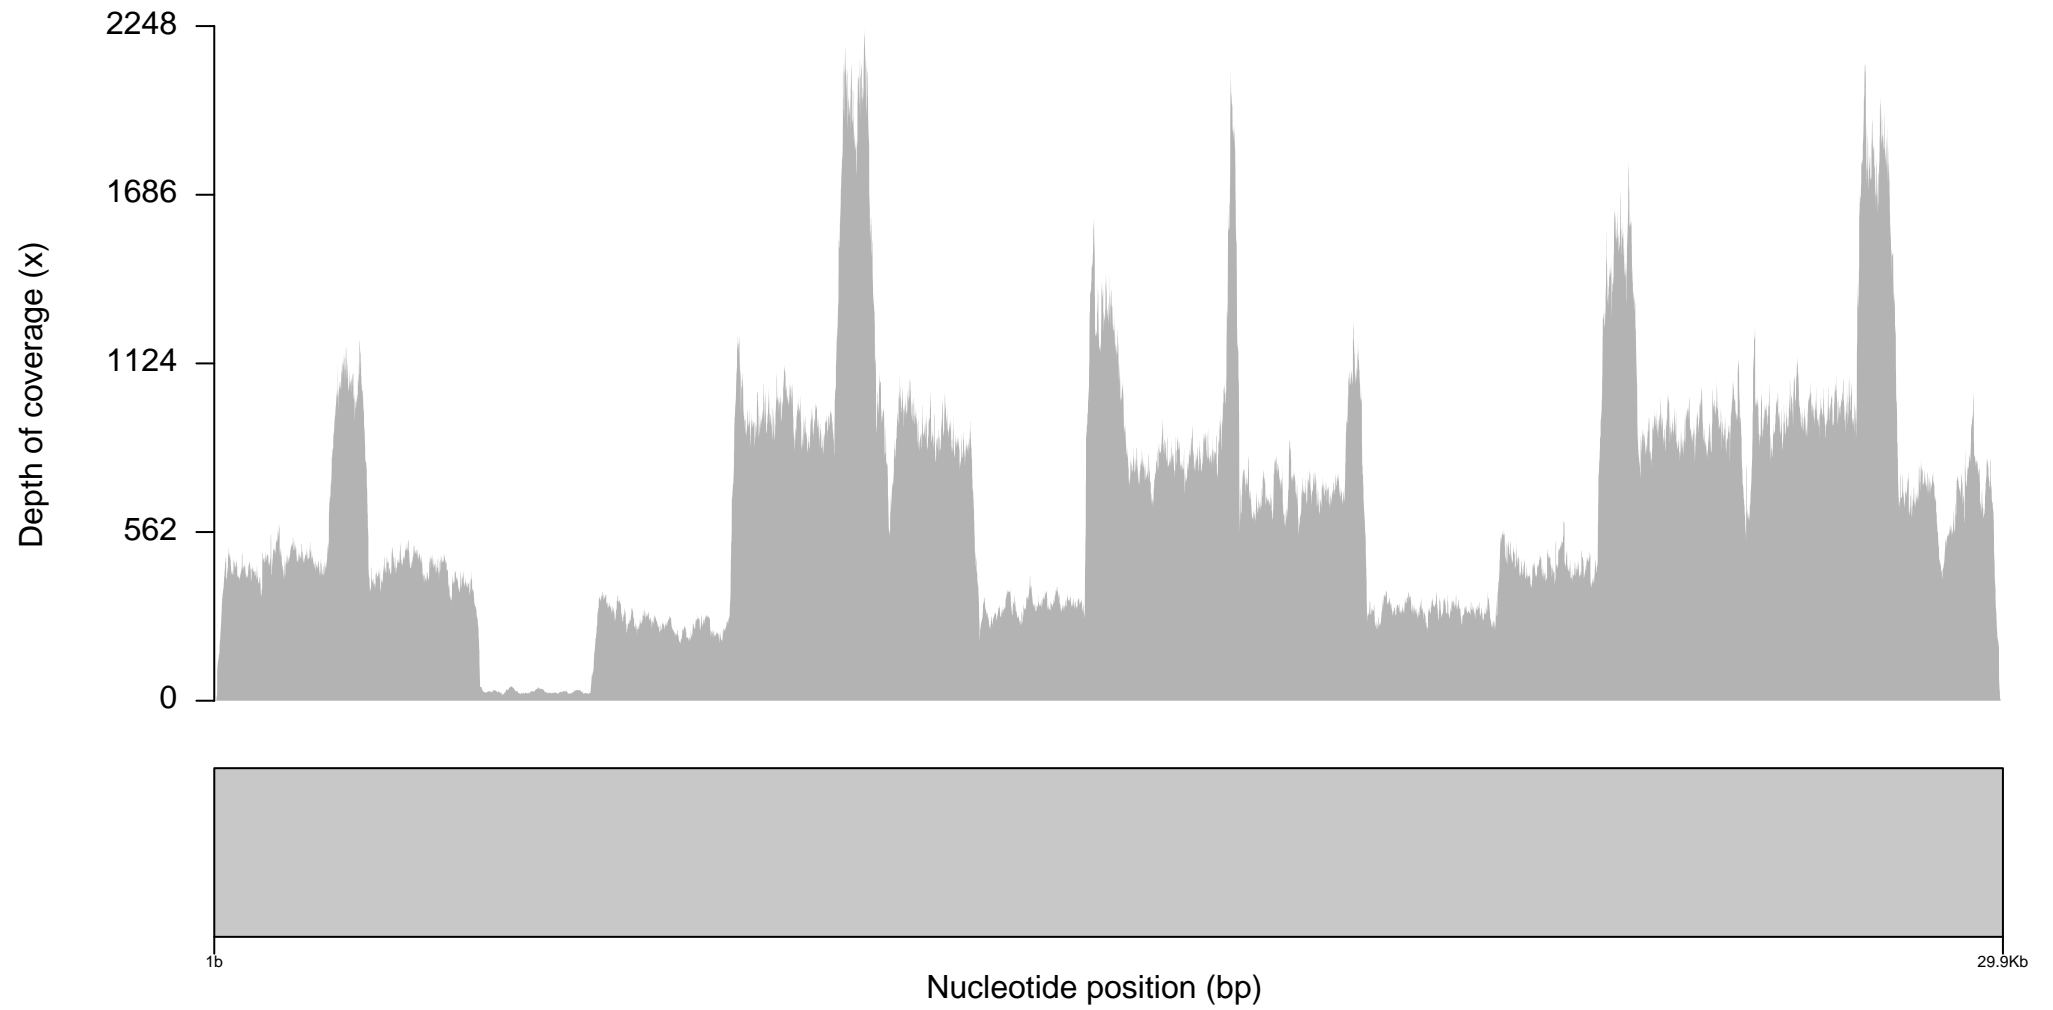

Sequencing depth of coverage for Sample: hCoV-19\_Brazil\_RS-HBM-39519\_2021

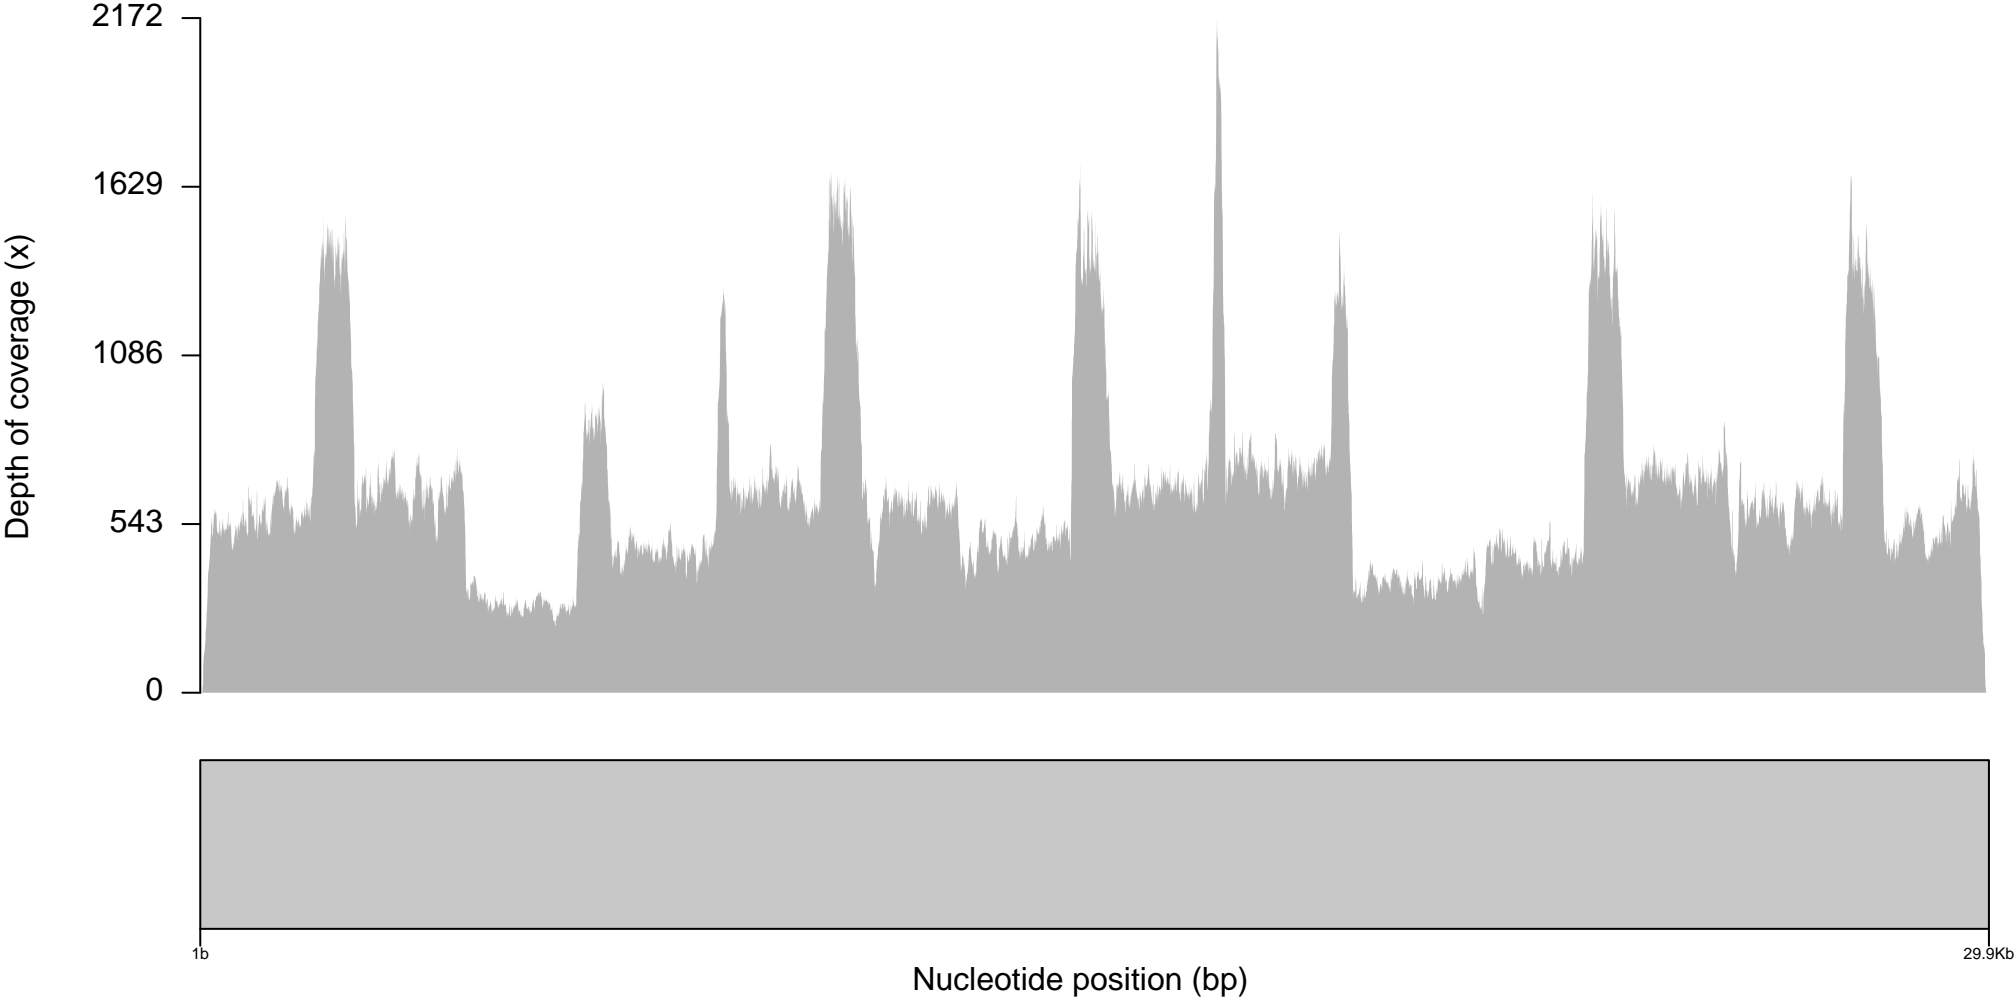

Sequencing depth of coverage for Sample: hCoV-19\_Brazil\_RS-HBM-39520\_2021

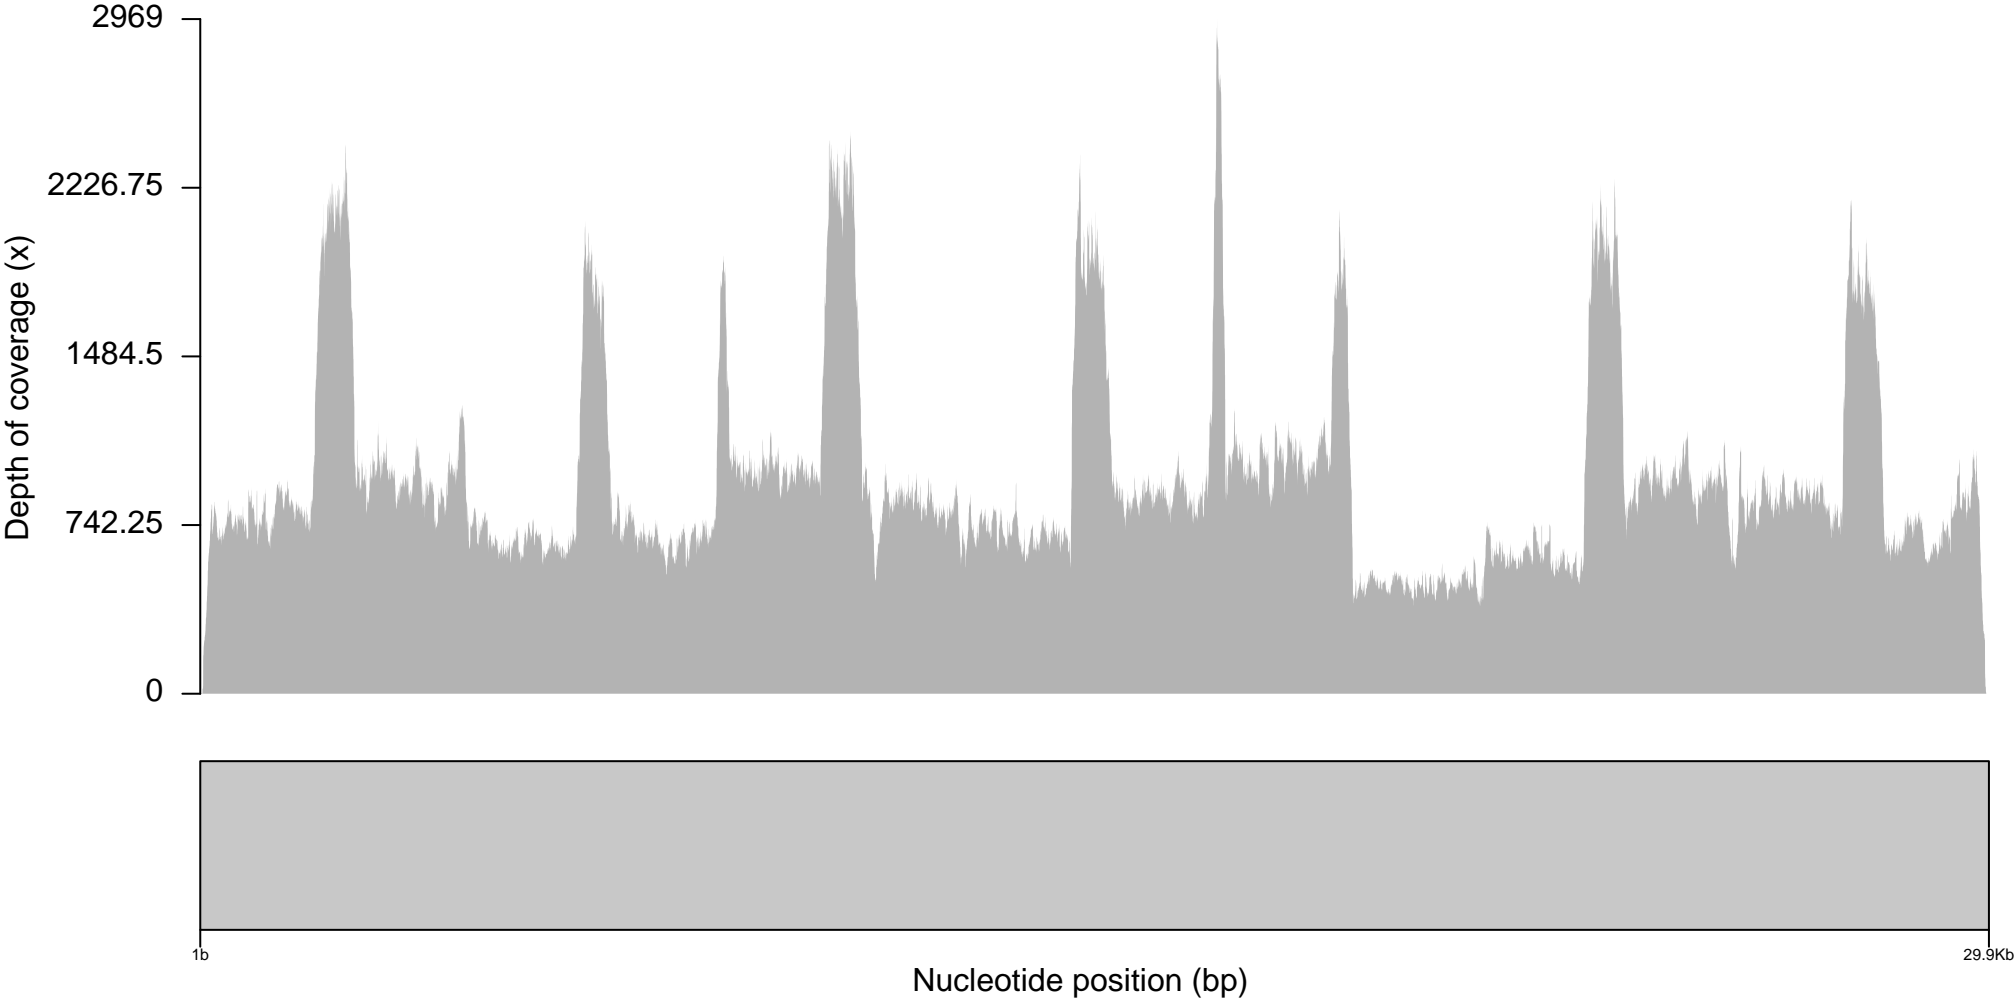

Sequencing depth of coverage for Sample: hCoV-19\_Brazil\_RS-HBM-39521\_2021

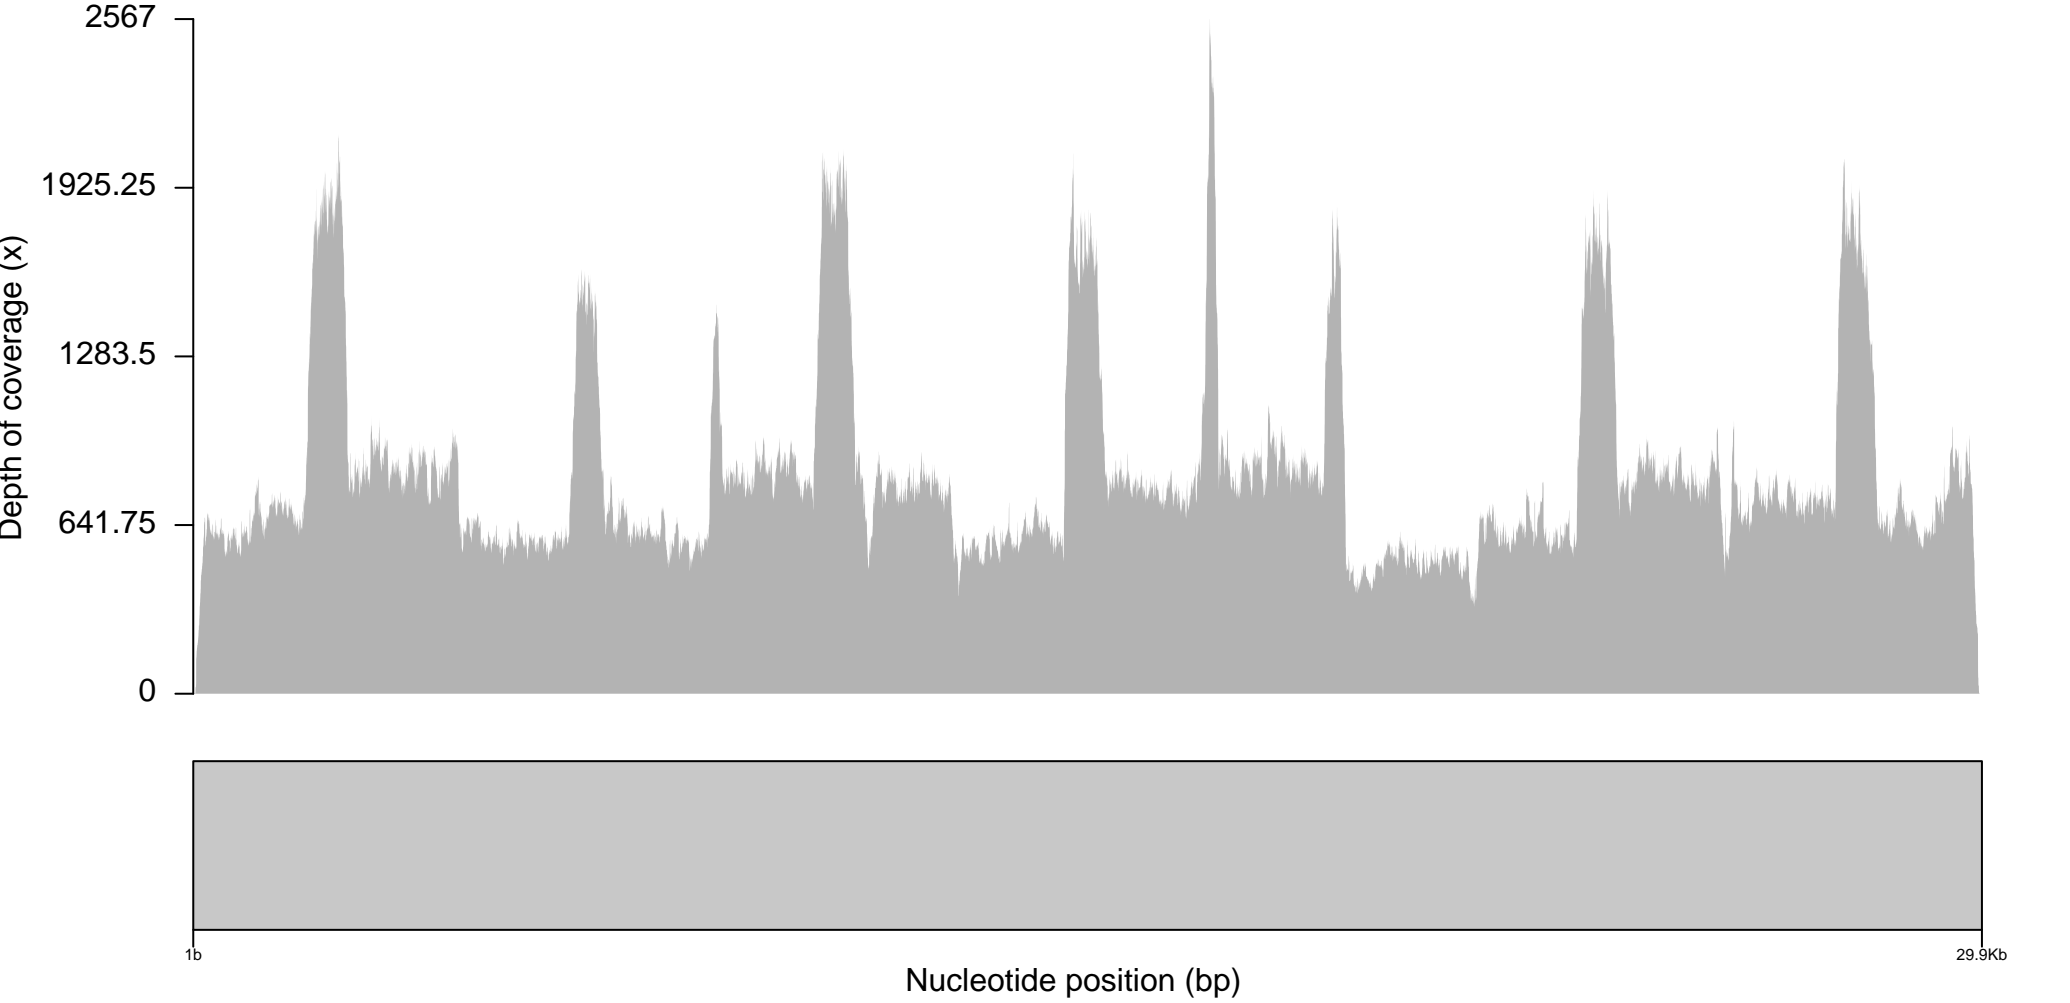

Sequencing depth of coverage for Sample: hCoV-19\_Brazil\_RS-HBM-39522\_2021

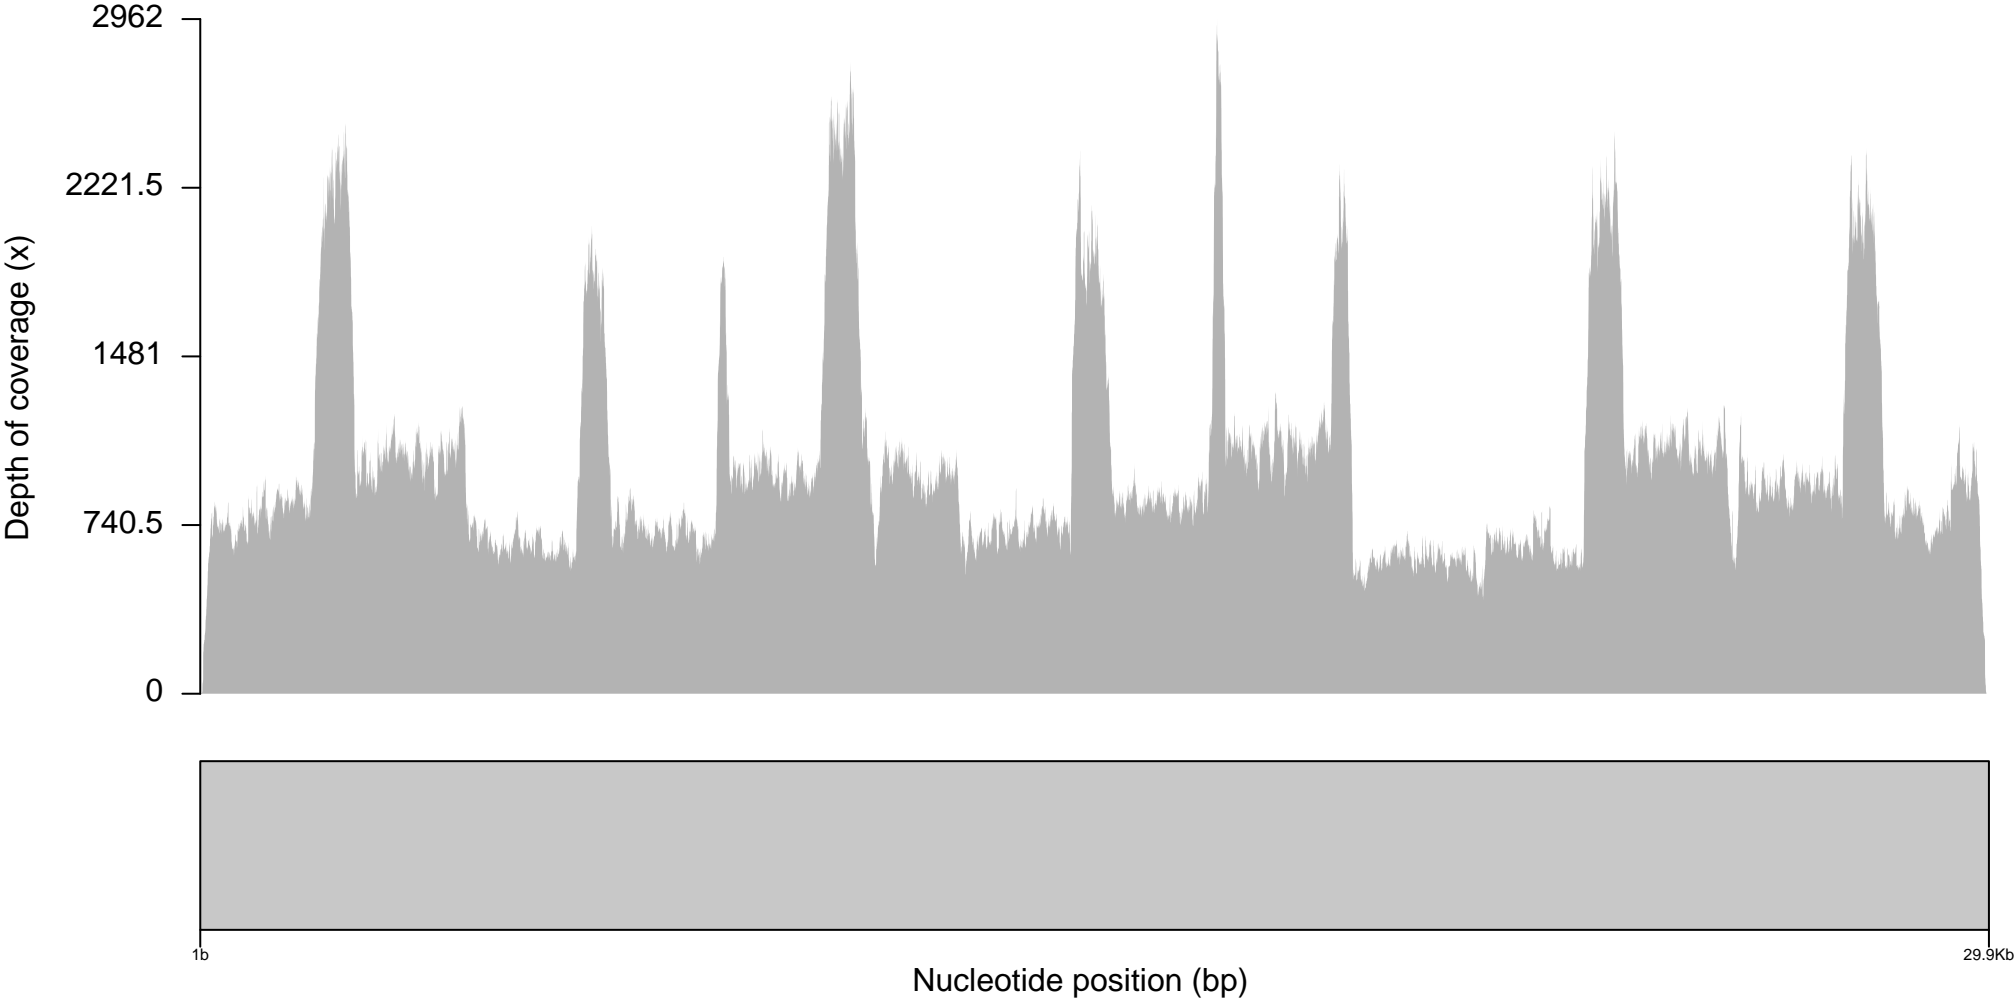

Sequencing depth of coverage for Sample: hCoV-19\_Brazil\_RS-HBM-39523\_2021

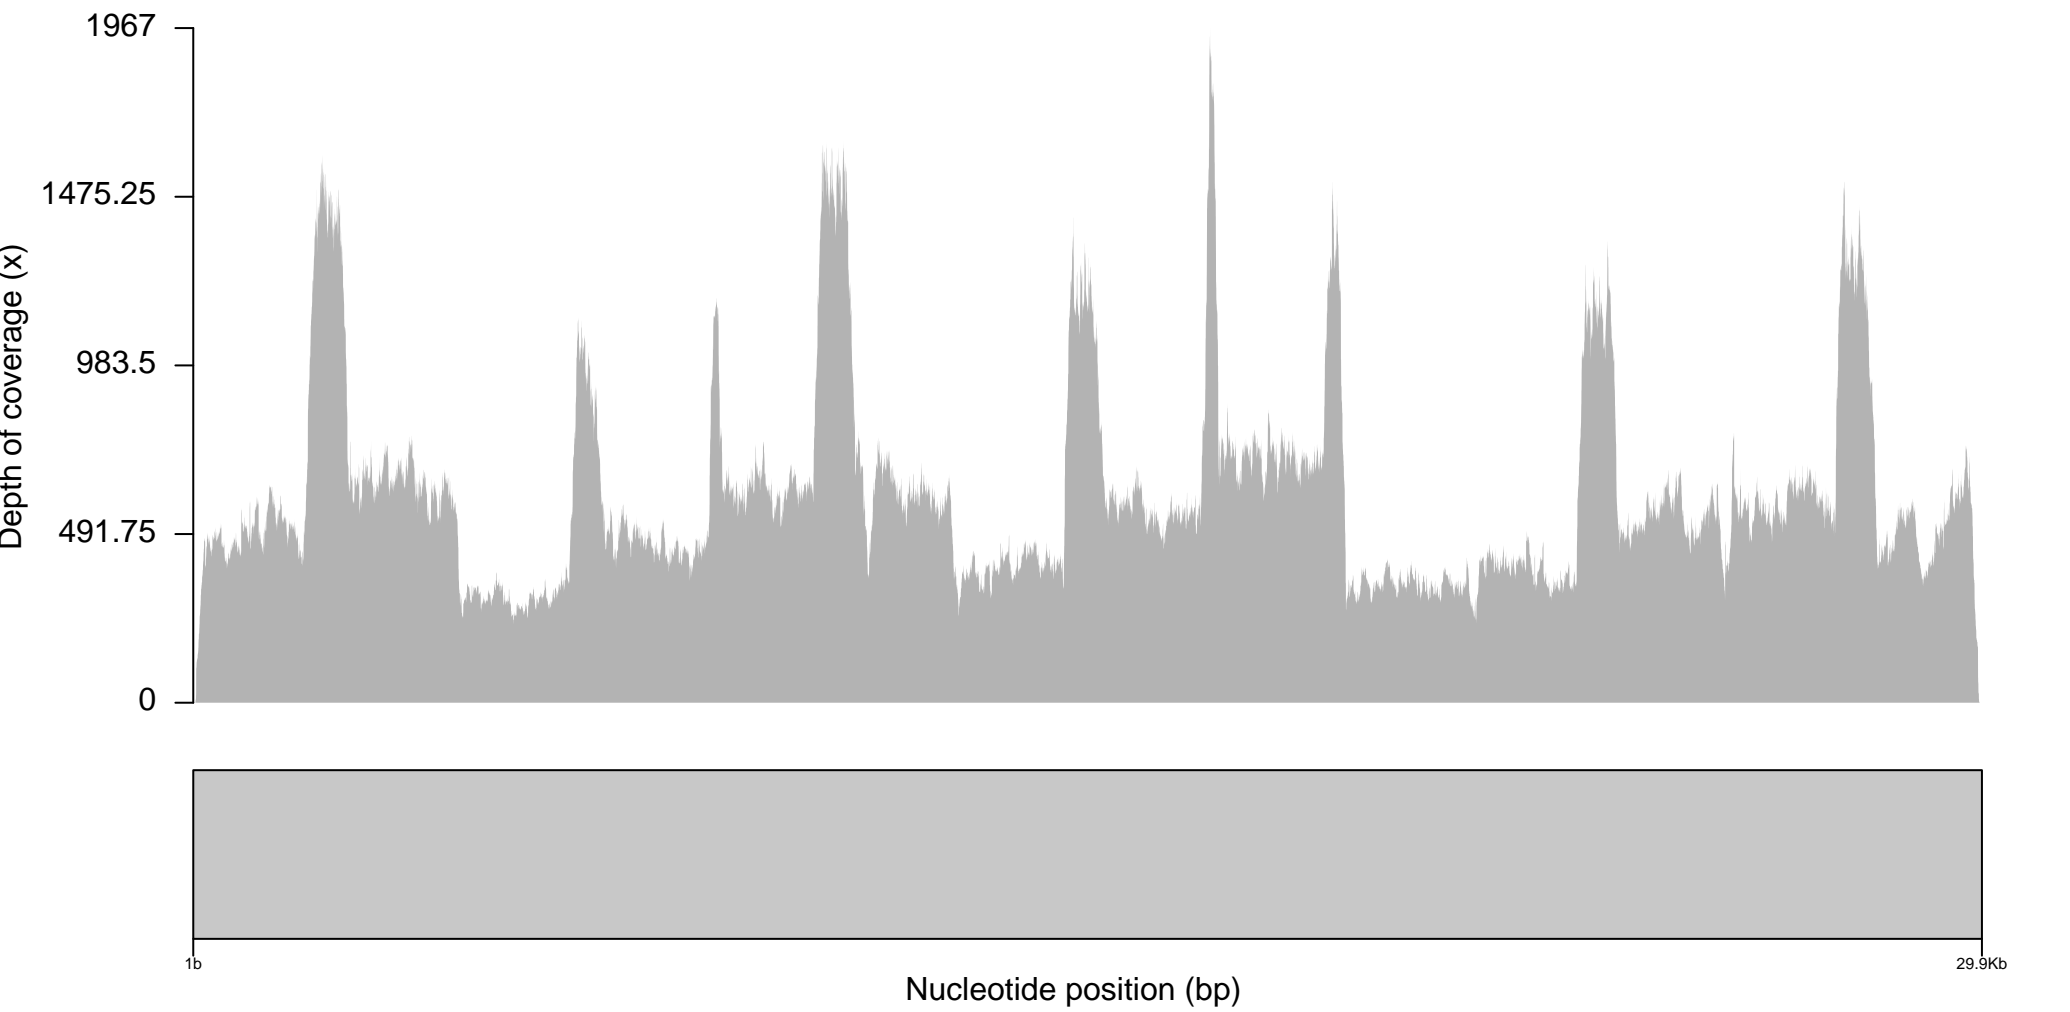

Supplement: Supplementary file 1 [file pathogens-10-00988-s001.zip › FigureS6.pdf]
