# Supplementary material for: Predominance of the SARS-CoV-2 Lineage P.1 and Its Sublineage P.1.2 in Patients from the Metropolitan Region of Porto Alegre, Southern Brazil in March 2021
Source: Pathogens. 2021 Aug 5;10(8):988. doi: 10.3390/pathogens10080988 (PMC8402156; doi:10.3390/pathogens10080988)
Supplement: Supplementary file 1 [file pathogens-10-00988-s001.zip › TableS1.pdf]

| Genomic position | Reference nt         | Changed nt | Gene / region | Effect, position inside gene and amino acid replacement                     | Mutation count | Frequency (%) |
|------------------|----------------------|------------|---------------|-----------------------------------------------------------------------------|----------------|---------------|
| 241              | C                    | T          | 5' UTR        | intergenic_region n.241C>T                                                  | 56             | 100.0         |
| 507              | ATGGTCATGTT<br>ATGGT | A          | ORF1ab        | disruptive_inframe_deletion<br>c.245_259delGTCATGTTATGGTTG p.Gly82_Val86del | 1              | 1.8           |
| 733              | T                    | C          |               | synonymous_variant c.468T>C p.Asp156Asp                                     | 54             | 96.4          |
| 775              | C                    | T          |               | synonymous_variant c.510C>T p.Thr170Thr                                     | 1              | 1.8           |
| 792              | A                    | G          |               | missense_variant c.527A>G p.Glu176Gly                                       | 1              | 1.8           |
| 843              | C                    | T          |               | missense_variant c.578C>T p.Pro193Leu                                       | 1              | 1.8           |
| 851              | T                    | C          |               | missense_variant c.586T>C p.Tyr196His                                       | 1              | 1.8           |
| 1395             | A                    | G          |               | missense_variant c.1130A>G p.Glu377Gly                                      | 1              | 1.8           |
| 1420             | C                    | T          |               | synonymous_variant c.1155C>T p.Ala385Ala                                    | 2              | 3.6           |
| 1463             | G                    | A          |               | missense_variant c.1198G>A p.Gly400Ser                                      | 3              | 5.4           |
| 1471             | C                    | T          |               | synonymous_variant c.1206C>T p.Arg402Arg                                    | 2              | 3.6           |
| 1757             | G                    | T          |               | missense_variant c.1492G>T p.Ala498Ser                                      | 1              | 1.8           |
| 1912             | C                    | T          |               | synonymous_variant c.1647C>T p.Ser549Ser                                    | 11             | 19.6          |
| 1942             | G                    | T          |               | synonymous_variant c.1677G>T p.Val559Val                                    | 1              | 1.8           |
| 2113             | C                    | T          |               | synonymous_variant c.1848C>T p.Ile616Ile                                    | 1              | 1.8           |
| 2445             | C                    | T          |               | missense_variant c.2180C>T p.Thr727Ile                                      | 1              | 1.8           |
| 2550             | A                    | G          |               | missense_variant c.2285A>G p.Asp762Gly                                      | 11             | 19.6          |
| 2749             | C                    | T          |               | synonymous_variant c.2484C>T p.Asp828Asp                                    | 53             | 94.6          |
| 2783             | A                    | G          |               | missense_variant c.2518A>G p.Asn840Asp                                      | 1              | 1.8           |
| 2890             | G                    | T          |               | synonymous_variant c.2625G>T p.Val875Val                                    | 1              | 1.8           |
| 3037             | C                    | T          |               | synonymous_variant c.2772C>T p.Phe924Phe                                    | 56             | 100.0         |
| 3096             | C                    | T          |               | missense_variant c.2831C>T p.Ser944Leu                                      | 1              | 1.8           |
| 3411             | C                    | T          |               | missense_variant c.3146C>T p.Ala1049Val                                     | 2              | 3.6           |

|      |   |   |                                           |    |      |
|------|---|---|-------------------------------------------|----|------|
| 3766 | T | C | synonymous_variant c.3501T>C p.Asp1167Asp | 1  | 1.8  |
| 3783 | T | C | missense_variant c.3518T>C p.Val1173Ala   | 1  | 1.8  |
| 3787 | C | T | synonymous_variant c.3522C>T p.Tyr1174Tyr | 1  | 1.8  |
| 3828 | C | T | missense_variant c.3563C>T p.Ser1188Leu   | 54 | 96.4 |
| 4655 | C | T | missense_variant c.4390C>T p.Arg1464Trp   | 1  | 1.8  |
| 4705 | T | C | synonymous_variant c.4440T>C p.Pro1480Pro | 3  | 5.4  |
| 4708 | T | C | synonymous_variant c.4443T>C p.Asp1481Asp | 1  | 1.8  |
| 4901 | C | T | synonymous_variant c.4636C>T p.Leu1546Leu | 1  | 1.8  |
| 5063 | G | A | missense_variant c.4798G>A p.Asp1600Asn   | 2  | 3.6  |
| 5407 | C | T | synonymous_variant c.5142C>T p.Ile1714Ile | 1  | 1.8  |
| 5648 | A | C | missense_variant c.5383A>C p.Lys1795Gln   | 48 | 85.7 |
| 5724 | C | T | missense_variant c.5459C>T p.Thr1820Ile   | 10 | 17.9 |
| 5986 | C | T | synonymous_variant c.5721C>T p.Phe1907Phe | 1  | 1.8  |
| 6218 | T | C | synonymous_variant c.5953T>C p.Leu1985Leu | 1  | 1.8  |
| 6319 | A | G | synonymous_variant c.6054A>G p.Pro2018Pro | 49 | 87.5 |
| 6363 | C | T | missense_variant c.6098C>T p.Ala2033Val   | 1  | 1.8  |
| 6525 | C | T | missense_variant c.6260C>T p.Thr2087Ile   | 1  | 1.8  |
| 6576 | G | T | missense_variant c.6311G>T p.Ser2104Ile   | 1  | 1.8  |
| 6613 | A | G | synonymous_variant c.6348A>G p.Val2116Val | 54 | 96.4 |
| 6840 | C | T | missense_variant c.6575C>T p.Ala2192Val   | 1  | 1.8  |
| 7201 | A | G | synonymous_variant c.6936A>G p.Ser2312Ser | 1  | 1.8  |
| 8092 | C | T | synonymous_variant c.7827C>T p.Leu2609Leu | 1  | 1.8  |
| 8128 | A | T | synonymous_variant c.7863A>T p.Ala2621Ala | 1  | 1.8  |
| 8392 | T | A | synonymous_variant c.8127T>A p.Ile2709Ile | 2  | 3.6  |
| 8849 | G | T | missense_variant c.8584G>T p.Val2862Leu   | 4  | 7.1  |
| 8905 | C | T | synonymous_variant c.8640C>T p.Asp2880Asp | 1  | 1.8  |
| 9042 | C | T | missense_variant c.8777C>T p.Ser2926Phe   | 1  | 1.8  |

|       |            |   |                                                                                 |    |      |
|-------|------------|---|---------------------------------------------------------------------------------|----|------|
| 9052  | A          | G | synonymous_variant c.8787A>G p.Pro2929Pro                                       | 1  | 1.8  |
| 9203  | G          | C | missense_variant c.8938G>C p.Asp2980His                                         | 1  | 1.8  |
| 9329  | G          | A | missense_variant c.9064G>A p.Asp3022Asn                                         | 1  | 1.8  |
| 9532  | C          | T | synonymous_variant c.9267C>T p.Phe3089Phe                                       | 1  | 1.8  |
| 9856  | G          | T | synonymous_variant c.9591G>T p.Val3197Val                                       | 1  | 1.8  |
| 10096 | G          | A | synonymous_variant c.9831G>A p.Glu3277Glu                                       | 2  | 3.6  |
| 10138 | C          | T | synonymous_variant c.9873C>T p.Asn3291Asn                                       | 1  | 1.8  |
| 10369 | C          | T | synonymous_variant c.10104C>T p.Arg3368Arg                                      | 1  | 1.8  |
| 10507 | C          | T | synonymous_variant c.10242C>T p.Asn3414Asn                                      | 4  | 7.1  |
| 10525 | C          | T | synonymous_variant c.10260C>T p.Val3420Val                                      | 1  | 1.8  |
| 10667 | T          | G | missense_variant c.10402T>G p.Leu3468Val                                        | 1  | 1.8  |
| 10851 | C          | T | missense_variant c.10586C>T p.Ala3529Val                                        | 1  | 1.8  |
| 10885 | T          | C | synonymous_variant c.10620T>C p.Asn3540Asn                                      | 1  | 1.8  |
| 10981 | G          | T | synonymous_variant c.10716G>T p.Val3572Val                                      | 1  | 1.8  |
| 11095 | C          | T | synonymous_variant c.10830C>T p.Ala3610Ala                                      | 3  | 5.4  |
| 11287 | GTCTGGTTTT | G | conservative_inframe_deletion<br>c.11023_11031delTCTGGTTTT p.Ser3675_Phe3677del | 4  | 7.1  |
| 11291 | G          | A | missense_variant c.11026G>A p.Gly3676Ser                                        | 6  | 10.7 |
| 11296 | T          | G | missense_variant c.11031T>G p.Phe3677Leu                                        | 17 | 30.4 |
| 11518 | C          | T | synonymous_variant c.11253C>T p.Val3751Val                                      | 3  | 5.4  |
| 11750 | C          | T | missense_variant c.11485C>T p.Leu3829Phe                                        | 1  | 1.8  |
| 11824 | C          | T | synonymous_variant c.11559C>T p.Ile3853Ile                                      | 1  | 1.8  |
| 12053 | C          | T | missense_variant c.11788C>T p.Leu3930Phe                                        | 2  | 3.6  |
| 12174 | A          | G | missense_variant c.11909A>G p.Asn3970Ser                                        | 1  | 1.8  |
| 12191 | G          | T | missense_variant c.11926G>T p.Val3976Phe                                        | 1  | 1.8  |
| 12778 | C          | T | synonymous_variant c.12513C>T p.Tyr4171Tyr                                      | 53 | 94.6 |
| 12809 | C          | T | missense_variant c.12544C>T p.Leu4182Phe                                        | 1  | 1.8  |

|       |   |   |                                            |    |      |
|-------|---|---|--------------------------------------------|----|------|
| 12964 | A | G | synonymous_variant c.12699A>G p.Gly4233Gly | 1  | 1.8  |
| 13059 | C | T | missense_variant c.12794C>T p.Thr4265Ile   | 1  | 1.8  |
| 13176 | C | T | missense_variant c.12911C>T p.Thr4304Ile   | 1  | 1.8  |
| 13459 | G | T | synonymous_variant c.13194G>T p.Ser4398Ser | 1  | 1.8  |
| 13536 | C | T | missense_variant c.13271C>T p.Thr4424Ile   | 1  | 1.8  |
| 13572 | T | C | missense_variant c.13307T>C p.Val4436Ala   | 1  | 1.8  |
| 13724 | C | T | synonymous_variant c.13459C>T p.Leu4487Leu | 1  | 1.8  |
| 13860 | C | T | missense_variant c.13595C>T p.Thr4532Ile   | 53 | 94.6 |
| 14408 | C | T | synonymous_variant c.14143C>T p.Leu4715Leu | 55 | 98.2 |
| 15043 | G | A | missense_variant c.14778G>A p.Met4926Ile   | 1  | 1.8  |
| 15082 | A | G | synonymous_variant c.14817A>G p.Pro4939Pro | 1  | 1.8  |
| 15708 | G | T | stop_lost c.15443G>T p.Ter5148Leuext*?     | 1  | 1.8  |
| 15903 | A | G | missense_variant c.15638A>G p.Asn5213Ser   | 1  | 1.8  |
| 16611 | C | T | missense_variant c.16346C>T p.Pro5449Leu   | 1  | 1.8  |
| 16794 | T | C | missense_variant c.16529T>C p.Val5510Ala   | 1  | 1.8  |
| 16887 | C | T | missense_variant c.16622C>T p.Thr5541Ile   | 3  | 5.4  |
| 16954 | C | T | synonymous_variant c.16689C>T p.His5563His | 1  | 1.8  |
| 17259 | G | T | missense_variant c.16994G>T p.Ser5665Ile   | 53 | 94.6 |
| 17562 | G | T | missense_variant c.17297G>T p.Gly5766Val   | 1  | 1.8  |
| 17706 | G | A | missense_variant c.17441G>A p.Gly5814Asp   | 1  | 1.8  |
| 17889 | A | G | missense_variant c.17624A>G p.Lys5875Arg   | 1  | 1.8  |
| 18973 | G | A | synonymous_variant c.18708G>A p.Arg6236Arg | 1  | 1.8  |
| 20149 | A | C | synonymous_variant c.19884A>C p.Ser6628Ser | 1  | 1.8  |
| 20730 | G | T | missense_variant c.20465G>T p.Ser6822Ile   | 3  | 5.4  |
| 20877 | T | C | missense_variant c.20612T>C p.Val6871Ala   | 1  | 1.8  |
| 20931 | G | A | missense_variant c.20666G>A p.Arg6889Gln   | 1  | 1.8  |
| 21519 | A | C | missense_variant c.21254A>C p.Glu7085Ala   | 1  | 1.8  |

---

|       |   |   |       |                                           |    |       |
|-------|---|---|-------|-------------------------------------------|----|-------|
| 21614 | C | T | Spike | missense_variant c.52C>T p.Leu18Phe       | 54 | 96.4  |
| 21621 | C | A |       | missense_variant c.59C>A p.Thr20Asn       | 53 | 94.6  |
| 21638 | C | T |       | missense_variant c.76C>T p.Pro26Ser       | 54 | 96.4  |
| 21974 | G | T |       | missense_variant c.412G>T p.Asp138Tyr     | 54 | 96.4  |
| 22020 | T | C |       | missense_variant c.458T>C p.Met153Thr     | 1  | 1.8   |
| 22132 | G | T |       | missense_variant c.570G>T p.Arg190Ser     | 54 | 96.4  |
| 22336 | G | T |       | missense_variant c.774G>T p.Trp258Cys     | 1  | 1.8   |
| 22413 | C | T |       | missense_variant c.851C>T p.Thr284Ile     | 1  | 1.8   |
| 22487 | G | A |       | missense_variant c.925G>A p.Glu309Lys     | 1  | 1.8   |
| 22812 | A | C |       | missense_variant c.1250A>C p.Lys417Thr    | 54 | 96.4  |
| 23012 | G | A |       | missense_variant c.1450G>A p.Glu484Lys    | 54 | 96.4  |
| 23063 | A | T |       | missense_variant c.1501A>T p.Asn501Tyr    | 54 | 96.4  |
| 23403 | A | G |       | missense_variant c.1841A>G p.Asp614Gly    | 56 | 100.0 |
| 23417 | G | C |       | missense_variant c.1855G>C p.Glu619Gln    | 1  | 1.8   |
| 23525 | C | T |       | missense_variant c.1963C>T p.His655Tyr    | 54 | 96.4  |
| 23628 | G | T |       | missense_variant c.2066G>T p.Ser689Ile    | 1  | 1.8   |
| 23639 | A | T |       | missense_variant c.2077A>T p.Ile693Phe    | 1  | 1.8   |
| 24023 | C | T |       | synonymous_variant c.2461C>T p.Leu821Leu  | 1  | 1.8   |
| 24616 | C | T |       | synonymous_variant c.3054C>T p.Ile1018Ile | 1  | 1.8   |
| 24642 | C | T |       | missense_variant c.3080C>T p.Thr1027Ile   | 54 | 96.4  |
| 25088 | G | T |       | missense_variant c.3526G>T p.Val1176Phe   | 56 | 100.0 |
| 25158 | A | G |       | missense_variant c.3596A>G p.Asp1199Gly   | 1  | 1.8   |
| 25294 | C | T |       | synonymous_variant c.3732C>T p.Leu1244Leu | 1  | 1.8   |
| 25314 | G | T |       | missense_variant c.3752G>T p.Gly1251Val   | 1  | 1.8   |
| 25423 | G | C | ORF3a | missense_variant c.31G>C p.Gly11Arg       | 1  | 1.8   |
| 25471 | G | T |       | missense_variant c.79G>T p.Asp27Tyr       | 1  | 1.8   |
| 25483 | G | A |       | missense_variant c.91G>A p.Ala31Thr       | 1  | 1.8   |

|       |      |      |              |                                                  |    |      |
|-------|------|------|--------------|--------------------------------------------------|----|------|
| 25563 | G    | T    |              | missense_variant c.171G>T p.Gln57His             | 1  | 1.8  |
| 25641 | G    | T    |              | missense_variant c.249G>T p.Leu83Phe             | 8  | 14.3 |
| 25658 | C    | T    |              | missense_variant c.266C>T p.Thr89Ile             | 1  | 1.8  |
| 25725 | A    | G    |              | synonymous_variant c.333A>G p.Leu111Leu          | 1  | 1.8  |
| 25728 | C    | T    |              | synonymous_variant c.336C>T p.Val112Val          | 2  | 3.6  |
| 25771 | C    | T    |              | missense_variant c.379C>T p.Leu127Phe            | 1  | 1.8  |
| 25855 | G    | T    |              | missense_variant c.463G>T p.Asp155Tyr            | 11 | 19.6 |
| 26063 | G    | T    |              | missense_variant c.671G>T p.Gly224Val            | 1  | 1.8  |
| 26149 | T    | C    |              | missense_variant c.757T>C p.Ser253Pro            | 53 | 94.6 |
| 26149 | TCCG | CCCT |              | stop_gained c.757_760delTCCGinsCCCT p.SerGly253* | 1  | 1.8  |
| 26171 | T    | A    |              | missense_variant c.779T>A p.Met260Lys            | 4  | 7.1  |
| 26861 | T    | C    |              | synonymous_variant c.339T>C p.Asn113Asn          | 3  | 5.4  |
| 26936 | C    | T    | Membrane     | synonymous_variant c.414C>T p.Leu138Leu          | 1  | 1.8  |
| 26988 | C    | T    |              | synonymous_variant c.466C>T p.Leu156Leu          | 1  | 1.8  |
| 27441 | G    | T    |              | missense_variant c.48G>T p.Glu16Asp              | 3  | 5.4  |
| 27467 | G    | T    |              | missense_variant c.74G>T p.Arg25Ile              | 1  | 1.8  |
| 27496 | T    | A    | ORF7a        | missense_variant c.103T>A p.Cys35Ser             | 1  | 1.8  |
| 27506 | G    | T    |              | missense_variant c.113G>T p.Gly38Val             | 1  | 1.8  |
| 27513 | C    | T    |              | synonymous_variant c.120C>T p.Tyr40Tyr           | 1  | 1.8  |
| 27684 | C    | T    |              | synonymous_variant c.291C>T p.Tyr97Tyr           | 1  | 1.8  |
| 27982 | C    | T    |              | missense_variant c.89C>T p.Pro30Leu              | 1  | 1.8  |
| 28003 | G    | T    |              | missense_variant c.110G>T p.Cys37Phe             | 1  | 1.8  |
| 28167 | G    | A    | ORF8         | missense_variant c.274G>A p.Glu92Lys             | 53 | 94.6 |
| 28199 | T    | C    |              | synonymous_variant c.306T>C p.Cys102Cys          | 1  | 1.8  |
| 28253 | C    | T    |              | synonymous_variant c.360C>T p.Phe120Phe          | 2  | 3.6  |
| 28333 | C    | T    |              | synonymous_variant c.60C>T p.Pro20Pro            | 1  | 1.8  |
| 28436 | G    | T    | Nucleocapsid | missense_variant c.163G>T p.Ala55Ser             | 1  | 1.8  |

|       |         |         |        |                                                                     |    |      |
|-------|---------|---------|--------|---------------------------------------------------------------------|----|------|
| 28512 | C       | G       |        | missense_variant c.239C>G p.Pro80Arg                                | 54 | 96.4 |
| 28603 | C       | T       |        | synonymous_variant c.330C>T p.Phe110Phe                             | 1  | 1.8  |
| 28628 | G       | T       |        | missense_variant c.355G>T p.Ala119Ser                               | 1  | 1.8  |
| 28705 | T       | C       |        | synonymous_variant c.432T>C p.Asp144Asp                             | 1  | 1.8  |
| 28789 | C       | T       |        | synonymous_variant c.516C>T p.Tyr172Tyr                             | 11 | 19.6 |
| 28806 | G       | T       |        | missense_variant c.533G>T p.Gly178Val                               | 1  | 1.8  |
| 28817 | G       | T       |        | missense_variant c.544G>T p.Ala182Ser                               | 1  | 1.8  |
| 28877 | AGTAGGG | TCTAAAC |        | missense_variant c.604_610delAGTAGGGinsTCTAAAC<br>p.ArgGly203LysArg | 54 | 96.4 |
| 28881 | GGG     | AAC     |        | missense_variant c.608_610delGGGinsAAC<br>p.ArgGly203LysArg         | 2  | 3.6  |
| 28893 | C       | T       |        | missense_variant c.620C>T p.Pro207Leu                               | 1  | 1.8  |
| 28975 | G       | T       |        | missense_variant c.702G>T p.Met234Ile                               | 1  | 1.8  |
| 29095 | C       | T       |        | synonymous_variant c.822C>T p.Phe274Phe                             | 3  | 5.4  |
| 29160 | C       | T       |        | missense_variant c.887C>T p.Thr296Ile                               | 1  | 1.8  |
| 29197 | C       | T       |        | synonymous_variant c.924C>T p.Ala308Ala                             | 1  | 1.8  |
| 29421 | C       | T       |        | missense_variant c.1148C>T p.Pro383Leu                              | 1  | 1.8  |
| 29511 | G       | T       |        | missense_variant c.1238G>T p.Ser413Ile                              | 1  | 1.8  |
| 29688 | G       | T       | 3' UTR | intergenic_region n.29688G>T                                        | 1  | 1.8  |
| 29736 | G       | T       |        | intergenic_region n.29736G>T                                        | 1  | 1.8  |
